# Supplementary material for: BEAT CF pulmonary exacerbations core protocol for evaluating the management of pulmonary exacerbations in people with cystic fibrosis
Source: Springer Nature journal article supplement (doi:10.1186/s13063-023-07076-8), 2023-03-22
Supplement: MOESM2 [file 24662052]

| form_number | form_name | number | name      | prompt                | description | type   | units | default | values                                                                                                                                                                                                                                                                                                                                                                                                                                                                                                                                                                                                                                                                                                                                                                                                                                                                                                                                                                                                                                                                                                                                                                                                                                                                                                                                                                                                                                                                                                                                                                                                                                                                                                                                                                                                                                                                                                                                                                                                                                                                                                                                                                                                                                                                                                                                                                                                                                                                                                                                                                                                                                                                                                                                                                                                                                                                                                                                                                                                                                                                                                                                                                                                                                                                                                                                                                                                                                                                                                                                                                                                                                                                                                                                                                                                                                                                                                                                                                                                                                                                                                                                                                                                                                                                                                                                                                                                                                                                                                                                                                                                                                                                                                                                                                                                                                                                                                                                                                                                                                                                                                                                                                                                                                                                                                                                                                                                                                                                                                                                                                                                                                                                                                                                                                                                                                                                                                                                                                                                                                                                                                                                                                                                                                                                                                                                                                                                                                                                                                                                                                                                                                                                                                                                                                                                                                                                                                                                                                                                                                                                                                                                                                                                                                                                                                                                                                                                                                                                                                                                                                                                                                                                                                                                                                                                                                                                                                                                                                                                                                                                                                                                                                                                                                                                                                                                                                                                                                                                                                                                                                                                                                                                                                                                                                                                                                                                                                                                                                                                                                                                                                                                                                                                                                                                                                                                                                                                                                                                                                                                                                                                                                                                                                                                                                                                                                                                                                                                                                                                                                                                                                                                                                                                                                                                                                                                                                                                                                                                                                                                                                                                                                                                                                                                                                                                                                                                                                                                   |
|-------------|-----------|--------|-----------|-----------------------|-------------|--------|-------|---------|------------------------------------------------------------------------------------------------------------------------------------------------------------------------------------------------------------------------------------------------------------------------------------------------------------------------------------------------------------------------------------------------------------------------------------------------------------------------------------------------------------------------------------------------------------------------------------------------------------------------------------------------------------------------------------------------------------------------------------------------------------------------------------------------------------------------------------------------------------------------------------------------------------------------------------------------------------------------------------------------------------------------------------------------------------------------------------------------------------------------------------------------------------------------------------------------------------------------------------------------------------------------------------------------------------------------------------------------------------------------------------------------------------------------------------------------------------------------------------------------------------------------------------------------------------------------------------------------------------------------------------------------------------------------------------------------------------------------------------------------------------------------------------------------------------------------------------------------------------------------------------------------------------------------------------------------------------------------------------------------------------------------------------------------------------------------------------------------------------------------------------------------------------------------------------------------------------------------------------------------------------------------------------------------------------------------------------------------------------------------------------------------------------------------------------------------------------------------------------------------------------------------------------------------------------------------------------------------------------------------------------------------------------------------------------------------------------------------------------------------------------------------------------------------------------------------------------------------------------------------------------------------------------------------------------------------------------------------------------------------------------------------------------------------------------------------------------------------------------------------------------------------------------------------------------------------------------------------------------------------------------------------------------------------------------------------------------------------------------------------------------------------------------------------------------------------------------------------------------------------------------------------------------------------------------------------------------------------------------------------------------------------------------------------------------------------------------------------------------------------------------------------------------------------------------------------------------------------------------------------------------------------------------------------------------------------------------------------------------------------------------------------------------------------------------------------------------------------------------------------------------------------------------------------------------------------------------------------------------------------------------------------------------------------------------------------------------------------------------------------------------------------------------------------------------------------------------------------------------------------------------------------------------------------------------------------------------------------------------------------------------------------------------------------------------------------------------------------------------------------------------------------------------------------------------------------------------------------------------------------------------------------------------------------------------------------------------------------------------------------------------------------------------------------------------------------------------------------------------------------------------------------------------------------------------------------------------------------------------------------------------------------------------------------------------------------------------------------------------------------------------------------------------------------------------------------------------------------------------------------------------------------------------------------------------------------------------------------------------------------------------------------------------------------------------------------------------------------------------------------------------------------------------------------------------------------------------------------------------------------------------------------------------------------------------------------------------------------------------------------------------------------------------------------------------------------------------------------------------------------------------------------------------------------------------------------------------------------------------------------------------------------------------------------------------------------------------------------------------------------------------------------------------------------------------------------------------------------------------------------------------------------------------------------------------------------------------------------------------------------------------------------------------------------------------------------------------------------------------------------------------------------------------------------------------------------------------------------------------------------------------------------------------------------------------------------------------------------------------------------------------------------------------------------------------------------------------------------------------------------------------------------------------------------------------------------------------------------------------------------------------------------------------------------------------------------------------------------------------------------------------------------------------------------------------------------------------------------------------------------------------------------------------------------------------------------------------------------------------------------------------------------------------------------------------------------------------------------------------------------------------------------------------------------------------------------------------------------------------------------------------------------------------------------------------------------------------------------------------------------------------------------------------------------------------------------------------------------------------------------------------------------------------------------------------------------------------------------------------------------------------------------------------------------------------------------------------------------------------------------------------------------------------------------------------------------------------------------------------------------------------------------------------------------------------------------------------------------------------------------------------------------------------------------------------------------------------------------------------------------------------------------------------------------------------------------------------------------------------------------------------------------------------------------------------------------------------------------------------------------------------------------------------------------------------------------------------------------------------------------------------------------------------------------------------------------------------------------------------------------------------------------------------------------------------------------------------------------------------------------------------------------------------------------------------------------------------------------------------------------------------------------------------------------------------------------------------------------------------------------------------------------------------------------------------------------------------------------------------------------------------------------------------------------------------------------------------------------------------------------------------------------------------------------------------------------------------------------------------------------------------------------------------------------------------------------------------------------------------------------------------------------------------------------------------------------------------------------------------------------------------------------------------------------------------------------------------------------------------------------------------------------------------------------------------------------------------------------------------------------------------------------------------------------------------------------------------------------------------------------------------------------------------------------------------------------------------------------------------------------------------------------------------------------------------------------------------------------------------------------------------------------------------------------------------------|
| 1           | Baseline  | 1.1    | genotype1 | Genotype (Mutation 1) |             | option |       |         | 1 = F30del -- p.Phe30del -- c.1321_1523delCTT<br>2 = G54GX -- p.Gly54GX -- c.624G>T<br>3 = G551D -- p.Gly551Asp -- c.1652G>A<br>4 = W1302K -- p.Arg1302Lys -- c.3906C>G<br>5 = W1292K -- p.Trp1292X -- c.3846G>A<br>6 = R117H;ST -- p.Arg117His;None(ST) -- c.[350G>A<br>7 = R117H;T -- p.Arg117His;None(T) -- c.[350G>A<br>8 = R117H -- p.Arg117His -- c.350G>A<br>9 = R553X -- p.Arg553X -- c.1657C>T<br>10 = 1717-1G>A -- None -- c.1585-1G>A<br>11 = 821+1G>T -- None -- c.489-1G>T<br>12 = 2789+5G>A -- None -- c.2657+5G>A<br>13 = 3849+10RkC>T -- None -- c.3717+12191C>T<br>14 = R1162T -- p.Arg1162X -- c.3484C>T<br>15 = 2183AA-G or 2183deAA-G -- p.Lys684Serfs<br>16 = CFTRdel2-3 -- p.Ser18ArgfsX18 -- c.54-59del<br>17 = G8E -- p.Gly8G -- c.254G>A<br>18 = 3120+1G>A -- None -- c.2988+1G>A<br>19 = 1501del -- p.Ile507del -- c.1519_1521delATC<br>20 = 1898+1G>A -- None -- c.1766+1G>A<br>21 = 3659delC -- p.Lys1177SerfsX15 -- c.3528delC<br>22 = R34T -- p.Arg34T -- c.1040G>C<br>23 = D1152H -- p.Asp1152His -- c.3454G>C<br>24 = R560T -- p.Arg560Thr -- c.1679G>C<br>25 = 3272-28A>G -- None -- c.3140-28A>G<br>26 = Q493X -- p.Gln493X -- c.1477C>T<br>27 = E50X -- p.Glu50X -- c.178G>T<br>28 = R334W -- p.Arg334Trp -- c.1000C>T<br>29 = 394delTT -- p.Leu818IlefsX22 -- c.282_283delTT<br>30 = 2184insA -- p.Gln657ThrfsX4 -- c.2052_2053inA<br>31 = S71G11 -- None -- c.[1210-125];1210-34T(G)1<br>32 = S71G12 -- None -- c.[1210-125];1210-34T(G)1<br>33 = S71G13 -- None -- c.[1210-125];1210-34T(G)1<br>34 = S71G not specified -- None -- c.[1210-125]<br>35 = 3905insT -- p.Leu1258PhefsX7 -- c.3773_3774inT<br>36 = Y1092X -- p.Tyr1092X -- c.3276C>G<br>37 = Y1092X -- p.Tyr1092X -- c.3276C>G<br>38 = Y1092X -- p.Tyr1092X -- cDNA variant not spec<br>39 = A455E -- p.Ala455Glu -- c.1364C>A<br>40 = 2184delA -- p.Lys684SerfsX8 -- c.2052delA<br>41 = R1066C -- p.Arg1066Cys -- c.3196C>T<br>42 = 1078delT -- p.Phe316LeufsX12 -- c.948delT<br>43 = 1154insT -- p.Phe342HisfsX28 -- c.1022_1023inT<br>44 = R1158X -- p.Arg1158X -- c.3472C>T<br>45 = R347H -- p.Arg347His -- c.1040G>A<br>46 = S1251N -- p.Ser1251Asn -- c.3753G>A<br>47 = L206W -- p.Leu206Trp -- c.617T>G<br>48 = S549R -- p.Ser549Arg -- c.1645A>C<br>49 = M1101K -- p.Met1101Lys -- c.3302T>A<br>50 = 711+1G>T -- None -- c.579+1G>T<br>51 = Y122X -- p.Tyr122X -- c.366T>A<br>52 = 214delT -- p.Leu677X -- c.2012delT<br>53 = S945L -- p.Ser945Leu -- c.2834C>T<br>54 = 1148T -- p.Ile148Thr -- c.443T>C<br>55 = R117G -- p.Arg117G -- c.348C>T<br>56 = V520F -- p.Val520Phe -- c.1558G>T<br>57 = S1235R -- p.Ser1235Arg -- c.3705T>G<br>58 = T338L -- p.Trp338Leu -- c.1013C>T<br>59 = P67L -- p.Pro67Leu -- c.200C>T<br>60 = G124E -- p.Gly124Glu -- c.3731G>A<br>61 = G178R -- p.Gly178Arg -- c.532G>C<br>62 = 1677delTA -- p.Tyr515X -- c.1545_1546delTA<br>63 = R392Q -- p.Arg392Gln -- c.1055G>A<br>64 = 711+5G>A -- None -- c.579+5G>A<br>65 = R668C -- p.Arg668Cys -- c.2002C>T<br>66 = S549R -- p.Ser549Arg -- c.1645A>C<br>67 = S549R -- p.Ser549Arg -- c.1645T>G<br>68 = S549R -- p.Ser549Arg -- cDNA variant not spec<br>69 = A597T -- p.Ala597Thr -- c.1675G>A<br>70 = L1077P -- p.Leu1077Pro -- c.3201C>C<br>71 = W1089X -- p.Trp1089X -- c.3266G>A<br>72 = I1027T -- p.Ile1027Thr -- c.3080T>C<br>73 = G576A -- p.Gly576Asp -- c.1727G>C<br>74 = M470V -- p.Met470Val -- c.1408A>G<br>75 = 3120G>A -- None -- c.2988G>A<br>76 = R70X -- p.Arg70X -- c.223C>T<br>77 = W848X -- p.Trp848X -- c.2537G>A<br>78 = E58X -- p.Glu58X -- c.1753T>C<br>79 = 1811+1RkA>G -- None -- c.1879+1RkA>G<br>80 = 3876delA -- p.Lys1250ArgfsX9 -- c.3744delA<br>81 = D1270N -- p.Asp1270Asn -- c.3808G>A<br>82 = Q220X -- p.Gln220X -- c.696C>T<br>83 = 2307insA -- p.Glu268ArgfsX4 -- c.2175_2176inA<br>84 = D110H -- p.Asp110His -- c.328G>C<br>85 = 4016insT -- p.Ser1237PhefsX5 -- c.3884_3885inT<br>86 = 4382delA -- p.Glu1418ArgfsX14 -- c.4251delA<br>87 = I336R -- p.Ile336Arg -- c.1007T>A<br>88 = R1066H -- p.Arg1066His -- c.3197G>A<br>89 = 2347delG -- p.Val739TyrfsX16 -- c.2215delG<br>90 = L997F -- p.Leu997Phe -- c.2991G>C<br>91 = K710X -- p.Lys710X -- c.2139A>T<br>92 = E822X -- p.Glu822X -- c.2464G>T<br>93 = 1106SP -- p.Leu1065Pro -- c.3194T>C<br>94 = Q522X -- p.Gln522X -- c.1654C>T<br>95 = R74W -- p.Arg74Trp -- c.220C>T<br>96 = 2622+1G>A -- None -- c.2490+1G>A<br>97 = 2789-2insA -- None -- c.2657-2_2657-3insA<br>98 = E92X -- p.Glu92X -- c.274G>T<br>99 = Q38X -- p.Gln38X -- c.119C>T<br>100 = R175Q -- p.Arg175Gln -- c.224G>A<br>101 = D579G -- p.Asp579Gly -- c.1738A>G<br>102 = E631X -- p.Glu631X -- c.2491G>T<br>103 = 3007delG -- p.Ala659HisfsX9 -- c.2875delG<br>104 = 405+1G>A -- None -- c.273+1G>A<br>105 = 405-1G>A -- None -- c.274-1G>A<br>106 = 711+3A>G -- None -- c.579+3A>G<br>107 = Q131X -- p.Gln131X -- c.3937C>T<br>108 = R709R -- p.Arg709X -- c.2125C>T<br>109 = 2711delT -- p.Phe861LeufsX3 -- c.2583delT<br>110 = 4005+1G>A -- None -- c.387+1G>A<br>111 = 571delA -- p.Ile146LeufsX5 -- c.442delA<br>112 = 1525-1G>A -- None -- c.1393-1G>A<br>113 = 1812-1G>A -- None -- c.1686-1G>A<br>114 = 1123del -- p.Ile1234Val -- c.3700A>G<br>115 = R1070Q -- p.Arg1070Gln -- c.3208G>A<br>116 = S466X -- p.Ser466X -- c.1397C>G<br>117 = S466X -- p.Ser466X -- c.1397C>G<br>118 = S466X -- p.Ser466X -- cDNA variant not spec<br>119 = S469X -- p.Ser469X -- c.1466C>A<br>120 = L467P -- p.Leu467Pro -- c.1407C>C<br>121 = S492F -- p.Ser492Phe -- c.1475C>T<br>122 = 3791delC -- p.Thr1220LysfsX9 -- c.3659delC<br>123 = L527P -- p.Leu527Pro -- c.2780T>C<br>124 = 712-1G>T -- None -- c.580-1G>T<br>125 = E92K -- p.Glu92Lys -- c.274G>A<br>126 = Q359K;T360K -- p.Gln359;Lys360;Lys] -- c.223C>T<br>127 = Q890X -- p.Gln890X -- c.2666C>T<br>128 = R764X -- p.Arg764X -- c.2290C>G<br>129 = S1198X -- p.Ser1198X -- c.3587C>G<br>130 = W401X -- p.Trp401X -- c.1202G>A<br>131 = W401X -- p.Trp401X -- c.1202G>A<br>132 = W401X -- p.Trp401X -- cDNA variant not spec<br>133 = 1248+1G>A -- None -- c.1118+1G>A<br>134 = L732X -- p.Leu732X -- c.2195T>G<br>135 = Q88X -- p.Gln88X -- c.292C>T<br>136 = R1070W -- p.Arg1070Trp -- c.3208C>T<br>137 = R31C -- p.Arg31Cys -- c.91C>T<br>138 = R651X -- p.Arg651X -- c.2351C>T<br>139 = W1204X -- p.Trp1204X -- c.3811G>A<br>140 = W1204X -- p.Trp1204X -- c.3812G>A<br>141 = W1204X -- p.Trp1204X -- cDNA variant not spec<br>142 = 663delT -- p.Ile177MetfsX12 -- c.531delT<br>143 = F1652Y -- p.Phe1652Tyr -- c.1514T>G<br>144 = G330X -- p.Gly330X -- c.988C>T<br>145 = P205S -- p.Pro205Ser -- c.613C>T<br>146 = 1259insA -- p.Gln378AlafsX4 -- c.1127_1128inA<br>147 = 2586delT -- p.Leu518TyrfsX3 -- c.2453delT<br>148 = 852del22 -- p.Gly241GlufsX13 -- c.720_741del<br>149 = E1104X -- p.Glu1104X -- c.3310C>T<br>150 = H1591 -- p.His1591Tyr -- c.595C>T<br>151 = Q525X -- p.Gln525X -- c.1573C>T<br>152 = 1461insA -- p.Ile444ArgfsX9 -- c.1329_1330inA<br>153 = 1898-3A>G -- None -- c.1768-3A>G<br>154 = 7T -- None -- c.1210-12T<br>155 = CFTRdel22-23 -- None -- c.3964-78_4242+5<br>156 = D614G -- p.Asp614Gly -- c.1814A>G<br>157 = L227R -- p.Leu227Arg -- c.680T>G<br>158 = L585S -- p.Leu585Ser -- c.1673T>C<br>159 = 1219delT -- p.Trp581GlyfsX9 -- c.1181delT<br>160 = 1341+1G>A -- None -- c.1209+1G>A<br>161 = 1548delG -- p.Gly1730GlufsX4 -- c.1418delG<br>162 = 1717-8G>A -- None -- c.1586-8G>A<br>163 = 3121-1G>A -- None -- c.2988-1G>A<br>164 = 4297GTT>A -- None -- c.4077_4080delTTG<br>165 = 4577A>G -- p.Tyr1092GlyX4 -- c.32_327A<br>166 = G1068R -- p.Gly1068Arg -- c.3205G>A<br>167 = G970R -- p.Gly970Arg -- c.2908G>C<br>168 = M1V -- p.Met1Val -- c.1A>G<br>169 = R1162L -- p.Arg1162Leu -- c.3485G>T<br>170 = R560R -- p.Arg560Lys -- c.1679G>A<br>171 = S341P -- p.Ser341Pro -- c.1021T>C<br>172 = S977F -- p.Ser977Phe -- c.2930C>T<br>173 = V754M -- p.Val754Met -- c.2290G>A<br>174 = Y560D -- p.Tyr560Asp -- c.1701T>G<br>175 = 2594delGT -- p.Ser821ArgfsX4 -- c.2482_2483delGT<br>176 = 4374+1G>T -- None -- c.4242+1G>T<br>177 = R783X -- p.Arg783X -- c.2335C>T<br>178 = 2055del9 -- p.Ser641ArgfsX5 -- c.1923_11<br>179 = 2105-2111del(3n)AGAA -- p.Arg658LysfsX4<br>180 = G531E -- p.Gln531Ser -- c.161G>A<br>181 = A561E -- p.Ala561Glu -- c.1682C>A<br>182 = H1054D -- p.His1054Asp -- c.3160C>G<br>183 = 1288insA -- p.Asp360IlefsX2 -- c.1153_1154inA<br>184 = 1471delA -- p.Lys447ArgfsX2 -- c.1340delA<br>185 = 444delA -- p.Ile105SerfsX2 -- c.1306delA<br>186 = 3667insA -- p.Thr1178MetfsX17 -- c.3535_3536inA<br>187 = 3821delT -- p.Ser1231ProfsX4 -- c.3691delT<br>188 = 4326delTT -- p.Cys1400X -- c.4156_4197delTT<br>189 = R790X -- p.Arg790X -- c.2374C>T<br>190 = S912X -- p.Ser912X -- c.2735C>A<br>191 = C278X -- p.Cys278X -- c.892C>A<br>192 = 1811-1G>C -- None -- c.1679-1G>C<br>193 = 3850-1G>A -- None -- c.3718-1G>A<br>194 = 308insA -- p.Arg58LysfsX10 -- c.174_175insA<br>195 = A46D -- p.Ala46Asp -- c.137C>A<br>196 = 1782delA -- p.Gly531ValfsX9 -- c.1650delA<br>197 = 2118delA -- p.Thr63ArgfsX8 -- c.1986_1989delA<br>198 = 2869insG -- p.Tyr913X -- c.2737_2738insG<br>199 = 2896insA -- p.Val829GlufsX2 -- c.2764_2765inA<br>200 = 3132delTTG -- p.Val1001ArgfsX4 -- c.3022_3023delTTG<br>201 = 3737delA -- p.Asp1202AlafsX9 -- c.3605delA<br>202 = Q414X -- p.Gln414X -- c.1240C>T<br>203 = S1255X -- p.Ser1255X -- c.3764C>A<br>204 = E56K -- p.Glu56Lys -- c.166G>A<br>205 = G1061R -- p.Gly1061Arg -- c.3181G>C<br>206 = F1074L -- p.Phe1074Leu -- c.3222T>A<br>207 = G1349D -- p.Gly1349Asp -- c.4046G>A<br>208 = 4428insA -- p.Ser1435GlyfsX14 -- c.4296_4428inA<br>209 = Y849X -- p.Tyr849X -- c.2547C>A<br>210 = E1371X -- p.Glu1371X -- c.4111G>T<br>211 = 1898+1G>C -- None -- c.1768+1G>C<br>212 = 2790-1G>C -- None -- c.2658-1G>C<br>213 = 297-1G>A -- None -- c.165-1G>A<br>214 = 1824delA -- p.Asp565MetfsX7 -- c.1692delA<br>215 = 2556insAT -- p.Ser609IlefsX13 -- c.2424_2425inA<br>216 = 3121-977_3499+24del2515 -- None -- c.298<br>217 = 4015delA -- p.Ile1295PhefsX33 -- c.3883delA<br>218 = 675delA -- p.Leu163PhefsX5 -- c.543_546delA<br>219 = Y913X -- p.Tyr913X -- c.2739T>A<br>220 = Q1412X -- p.Gln1412X -- c.4234C>T<br>221 = S1255P -- p.Ser1255Pro -- c.3763T>C<br>222 = CFTRdel17a-18 -- None -- c.[2988+1_2989-1<br>223 = CFTRdel2 -- None -- c.([53+1_54+1],184+1)<br>224 = CFTRdel22-24 -- None -- c.([983+1_984+1]<br>225 = L1254X -- p.Leu1254X -- c.3781T>G<br>226 = 1138insG -- p.Ile338SerfsX28 -- c.1006_1007inG<br>227 = 935delA -- p.Asn268IlefsX17 -- c.803delA<br>228 = 1161delC -- p.Cys343X -- c.1029delC<br>229 = 1609delCA -- p.Gln49ValfsX10 -- c.1477_1478delCA<br>230 = CFTRdel14b-17b -- None -- c.([2618+1_2620-1<br>231 = CFTRdel17a-17b -- None -- c.([2988+1_2989-1<br>232 = E193X -- p.Glu193X -- c.577G>T<br>233 = CFTRdel17a-17b -- None -- c.([2988+1_2989-1 |

|   |          |       |           |                        |  |        |  |  |  |
|---|----------|-------|-----------|------------------------|--|--------|--|--|--|
| 1 | Baseline | 1.1.1 | genospec1 | Specify other Genotype |  | string |  |  |  |
|---|----------|-------|-----------|------------------------|--|--------|--|--|--|

| 1 | Baseline | 1.2 | genotype2 | Genotype (Mutation 2) | option                                                                                                                                                                                                                                                                                                                                                                                                                                                                                                                                                                                                                                                                                                                                                                                                                                                                                                                                                                                                                                                                                                                                                                                                                                                                                                                                                                                                                                                                                                                                                                                                                                                                                                                                                                                                                                                                                                                                                                                                                                                                                                                                                                                                                                                                                                                                                                                                                                                                                                                                                                                                                                                                                                                                                                                                                                                                                                                                                                                                                                                                                                                                                                                                                                                                                                                                                                                                                                                                                                                                                                                                                                                                                                                                                                                                                                                                                                                                                                                                                                                                                                                                                                                                                                                                                                                                                                                                                                                                                                                                                                                                                                                                                                                                                                                                                                                                                                                                                                                                                                                                                                                                                                                                                                                                                                                                                                                                                                                                                                                                                                                                                                                                                                                                                                                                                                                                                                                                                                                                                                                                                                                                                                                                                                                                                                                                                                                                                                                                                                                                                                                                                                                                                                                                                                                                                                                                                                                                                                                                                                                                                                                                                                                                                                                                                                                                                                                                                                                                                                                                                                                                                                                                                                                                                                                                                                                                                                                                                                                                                                                                                                                                                                                                                                                                                                                                                                                                                                                                                                                                                                                                                                                                                                                                                                                                                                                                                                                                                                                                                                                                                                                                                                                                                                                                                                                                                                                                                                                                                                                                                                                                                                                                                                                                                                                                                                                                                                                                                                                                                                                                                                                                                                                                                                                                                                                                                                                                                                             |
|---|----------|-----|-----------|-----------------------|----------------------------------------------------------------------------------------------------------------------------------------------------------------------------------------------------------------------------------------------------------------------------------------------------------------------------------------------------------------------------------------------------------------------------------------------------------------------------------------------------------------------------------------------------------------------------------------------------------------------------------------------------------------------------------------------------------------------------------------------------------------------------------------------------------------------------------------------------------------------------------------------------------------------------------------------------------------------------------------------------------------------------------------------------------------------------------------------------------------------------------------------------------------------------------------------------------------------------------------------------------------------------------------------------------------------------------------------------------------------------------------------------------------------------------------------------------------------------------------------------------------------------------------------------------------------------------------------------------------------------------------------------------------------------------------------------------------------------------------------------------------------------------------------------------------------------------------------------------------------------------------------------------------------------------------------------------------------------------------------------------------------------------------------------------------------------------------------------------------------------------------------------------------------------------------------------------------------------------------------------------------------------------------------------------------------------------------------------------------------------------------------------------------------------------------------------------------------------------------------------------------------------------------------------------------------------------------------------------------------------------------------------------------------------------------------------------------------------------------------------------------------------------------------------------------------------------------------------------------------------------------------------------------------------------------------------------------------------------------------------------------------------------------------------------------------------------------------------------------------------------------------------------------------------------------------------------------------------------------------------------------------------------------------------------------------------------------------------------------------------------------------------------------------------------------------------------------------------------------------------------------------------------------------------------------------------------------------------------------------------------------------------------------------------------------------------------------------------------------------------------------------------------------------------------------------------------------------------------------------------------------------------------------------------------------------------------------------------------------------------------------------------------------------------------------------------------------------------------------------------------------------------------------------------------------------------------------------------------------------------------------------------------------------------------------------------------------------------------------------------------------------------------------------------------------------------------------------------------------------------------------------------------------------------------------------------------------------------------------------------------------------------------------------------------------------------------------------------------------------------------------------------------------------------------------------------------------------------------------------------------------------------------------------------------------------------------------------------------------------------------------------------------------------------------------------------------------------------------------------------------------------------------------------------------------------------------------------------------------------------------------------------------------------------------------------------------------------------------------------------------------------------------------------------------------------------------------------------------------------------------------------------------------------------------------------------------------------------------------------------------------------------------------------------------------------------------------------------------------------------------------------------------------------------------------------------------------------------------------------------------------------------------------------------------------------------------------------------------------------------------------------------------------------------------------------------------------------------------------------------------------------------------------------------------------------------------------------------------------------------------------------------------------------------------------------------------------------------------------------------------------------------------------------------------------------------------------------------------------------------------------------------------------------------------------------------------------------------------------------------------------------------------------------------------------------------------------------------------------------------------------------------------------------------------------------------------------------------------------------------------------------------------------------------------------------------------------------------------------------------------------------------------------------------------------------------------------------------------------------------------------------------------------------------------------------------------------------------------------------------------------------------------------------------------------------------------------------------------------------------------------------------------------------------------------------------------------------------------------------------------------------------------------------------------------------------------------------------------------------------------------------------------------------------------------------------------------------------------------------------------------------------------------------------------------------------------------------------------------------------------------------------------------------------------------------------------------------------------------------------------------------------------------------------------------------------------------------------------------------------------------------------------------------------------------------------------------------------------------------------------------------------------------------------------------------------------------------------------------------------------------------------------------------------------------------------------------------------------------------------------------------------------------------------------------------------------------------------------------------------------------------------------------------------------------------------------------------------------------------------------------------------------------------------------------------------------------------------------------------------------------------------------------------------------------------------------------------------------------------------------------------------------------------------------------------------------------------------------------------------------------------------------------------------------------------------------------------------------------------------------------------------------------------------------------------------------------------------------------------------------------------------------------------------------------------------------------------------------------------------------------------------------------------------------------------------------------------------------------------------------------------------------------------------------------------------------------------------------------------------------------------------------------------------------------------------------------------------------------------------------------------------------------------------------------------------------------------------------------------------------------------------------------------------------------------------------------------------------------------------------------------------------------------------------------------------------------------------------------------------------------------------------------------------------------------------------------------------------------------------------------------------------------------------------------------------|
|   |          |     |           |                       | 1 = F508del---p.Phe508del---c.1521_1523delCTT<br>2 = G542X---p.Gly542X---c.1624G>T<br>3 = G551D---p.Gly551Asp---c.1658G>A<br>4 = N1303K---p.Asn1303Lys---c.3909C>G<br>5 = W1282X---p.Trp1282X---c.3849G>A---<br>6 = R1117H/5T---p.Arg1177His/None(5T)---c.3550G>A<br>7 = R1174H/7T---p.Arg1177His/None(7T)---c.3550G>A<br>8 = R1174H---p.Arg1177His---c.3550C>A<br>9 = R553X---p.Arg553X---c.1657G>T<br>10 = 1717-1G>A---None---c.1585-1G>A<br>11 = 621+1G>T---None---c.489+1G>T<br>12 = 2789+5G>A---None---c.2827+5G>A<br>13 = 3849+10kC>T---None---c.3717+12191C>T<br>14 = R1162X---p.Arg1162X---c.3484C>T<br>15 = 2183A>G or 2185G>A---p.Lys1845Asp/c.2183A>G or 2185G>A<br>16 = CFTRdel23-3---p.Ser1848Arg/c.154-594G<br>17 = G85E---p.Gly85Glu---c.254G>C<br>18 = 3120+1G>A---None---c.2989+1G>A<br>19 = I507del---p.Ile507del---c.1519_1521delATC<br>20 = R898+1G>A---None---c.1769+1G>A<br>21 = R659delC---p.Lys1175Ser/c.151---c.8528delC<br>22 = R347P---p.Arg347Pro---c.1040G>C<br>23 = D1152H---p.Asp1152His---c.3454G>C<br>24 = R560T---p.Arg560Thr---c.1879G>C<br>25 = 3272-28A>G---None---c.3140-28A>G<br>26 = G493X---p.Gln493X---c.1477C>T<br>27 = E90X---p.Glu90X---c.1763T<br>28 = R334W---p.Arg334Trp---c.1000C>T<br>29 = 394delT---p.Leu881His/c.262_263delTT<br>30 = 2184delA---p.Gln851Met/c.2092_2093delTT<br>31 = 5T1G11---None---c.[1210-125];[1210-34TQ]1<br>32 = 5T1G12---None---c.[1210-125];[1210-34TQ]2<br>33 = 5T1G13---None---c.[1210-125];[1210-34TQ]3<br>34 = 5T1G not specified---None---c.1210-125<br>35 = 3905insT---p.Leu1258Phe/c.3773_3774insT<br>36 = Y1092X---p.Tyr1092X---c.3276C>G<br>37 = Y1092X---p.Tyr1092X---c.3276C>G<br>38 = Y1092X---p.Tyr1092X---cDNA variant not spec<br>39 = A45E---p.Ala45Glu---c.1364C>A<br>40 = 2184delA---p.Lys84Asn/c.2052delA<br>41 = R1066C---p.Arg1066Gly---c.3196C>T<br>42 = I075delT---p.Phe319Leu/c.12---c.94delT<br>43 = 1154insTC---p.Phe342His/c.28---c.1022_102<br>44 = R1158X---p.Arg1158X---c.3472C>T<br>45 = R347H---p.Arg347His---c.1040G>A<br>46 = S1251N---p.Ser1251Asn---c.3782G>A<br>47 = L208W---p.Leu208Trp---c.617T>G<br>48 = S549R---p.Ser549Arg---c.1646G>A<br>49 = M1101K---p.Met1101Lys---c.3302T>A<br>50 = 711-1G>T---None---c.579+1G>T<br>51 = Y122X---p.Tyr122X---c.366T>A<br>52 = 2143delT---p.Leu671X---c.2072delT<br>53 = S945L---p.Ser945Leu---c.2834C>T<br>54 = I148T---p.Ile148Thr---c.443T>C<br>55 = R117C---p.Arg117Cys---c.349C>T<br>56 = V52F---p.Val52Phe---c.1593G>T<br>57 = S1235R---p.Ser1235Arg---c.3705T>G<br>58 = T338I---p.Trp338Ile---c.1013C>T<br>59 = P0T1---p.Phe0T1Leu---c.230C>T<br>60 = G1244E---p.Gly1244Glu---c.3731G>A<br>61 = G178R---p.Gly178Arg---c.532G>A<br>62 = I677delTA---p.Tyr510X---c.1545_1546delTA<br>63 = R352Q---p.Arg352Gln---c.1055G>A<br>64 = 711+5G>A---None---c.579+5G>A<br>65 = R686C---p.Arg686Cys---c.2302C>T<br>66 = S549R---p.Ser549Arg---c.1645A>C<br>67 = S549R---p.Ser549Arg---c.1647T>G<br>68 = S549R---p.Ser549Arg---cDNA variant not spec<br>69 = A559T---p.Ala559Thr---c.1675G>A<br>70 = L1077P---p.Leu1077Pro---c.3207C>C<br>71 = W1282X---p.Trp1282X---c.3286G>A<br>72 = I1027T---p.Ile1027Thr---c.3080T>C<br>73 = G576A---p.Gly576Ala---c.1727G>C<br>74 = M447V---p.Met447Val---c.1408A>G<br>75 = 3120G>A---None---c.2988G>A<br>76 = R75X---p.Arg75X---c.223C>T<br>77 = W848X---p.Trp848X---c.2537G>A<br>78 = E585X---p.Glu585X---c.1753G>T<br>79 = 1811+1.6kA>G---None---c.1679+1.6kA>G<br>80 = 4362delA---p.Lys1525Arg/c.4---c.374delA<br>81 = D1270N---p.Asp1270Asn---c.3808G>A<br>82 = G220X---p.Gln220X---c.658C>T<br>83 = 2307insA---p.Glu2849Gly/c.2175_2176insA<br>84 = D110H---p.Asp110His---c.328G>C<br>85 = 4016insT---p.Ser1297Phe/c.3884_3885insT<br>86 = 4362delA---p.Lys1525Arg/c.4---c.4251delA<br>87 = I336K---p.Ile336Lys---c.1007T>A<br>88 = R1066H---p.Arg1066His---c.3197G>A<br>89 = 2347delG---p.Ile707Phe/c.1---c.2215delG<br>90 = L997F---p.Leu997Phe---c.2991G>C<br>91 = K710X---p.Lys710X---c.2128A>T<br>92 = E92X---p.Glu92X---c.2484G>T<br>93 = L1065P---p.Leu1065Pro---c.3194T>C<br>94 = Q552X---p.Gln552X---c.1654C>T<br>95 = R740V---p.Arg740Val---c.2293C>T<br>96 = 2622+1G>A---None---c.2490+1G>A<br>97 = 2789+2insA---None---c.2657+2_2657+3insA<br>98 = E90X---p.Glu90X---c.2745T<br>99 = Q39X---p.Gln39X---c.115C>T<br>100 = R75Q---p.Arg75Gln---c.224G>A<br>101 = D578G---p.Asp578Gly---c.1786G>A<br>102 = E831X---p.Glu831X---c.2491G>T<br>103 = 3007delG---p.Ala959His/c.1---c.2875delG<br>104 = 405+1G>A---None---c.274+1G>A<br>105 = 406+1G>A---None---c.274+1G>A<br>106 = 711+3A>G---None---c.579+3A>G<br>107 = Q131X---p.Gln131X---c.3937C>T<br>108 = R709X---p.Arg709X---c.2125C>T<br>109 = 271delT---p.Phe61Leu/c.3---c.2583delT<br>110 = 405+1G>A---None---c.274+1G>A<br>111 = 574delA---p.Ile148Leu/c.5---c.442delA<br>112 = 1525-1G>A---None---c.1393-1G>A<br>113 = 1812-1G>A---None---c.1683-1G>A<br>114 = I1234V---p.Ile1234Val---c.3700A>G<br>115 = R1670Q---p.Arg1670Gln---c.3209G>A<br>116 = S46X---p.Ser46X---c.1397C>G<br>117 = S466X---p.Ser466X---c.1397C>G<br>118 = S466X---p.Ser466X---cDNA variant not spec<br>119 = S466X---p.Ser466X---c.1466C>A<br>120 = L467P---p.Leu467Pro---c.1400T>C<br>121 = S492F---p.Ser492Phe---c.1475C>T<br>122 = 3731delC---p.Trp1220Lys/c.1---c.3599delC<br>123 = L927P---p.Leu927Pro---c.2780T>C<br>124 = 712-1G>T---None---c.580-1G>T<br>125 = E92X---p.Glu92X---c.2745A<br>126 = Q359K/T360K---p.(Gln359Lys/Thr360Lys)---c.1<br>127 = Q890K---p.Gln890X---c.2668C>T<br>128 = R764X---p.Arg764X---c.2290C>T<br>129 = S1196K---p.Ser1196X---c.3587C>G<br>130 = W401X---p.Trp401X---c.1203G>A<br>131 = W401X---p.Trp401X---c.1203G>A<br>132 = W401X---p.Trp401X---cDNA variant not spec<br>133 = 1248+1G>A---None---c.1116+1G>A<br>134 = L732X---p.Leu732X---c.2195T>G<br>135 = Q98X---p.Gln98X---c.292C>T<br>136 = R1070H---p.Arg1070His---c.3209C>T<br>137 = R31C---p.Arg31Cys---c.81C>T<br>138 = R651X---p.Arg651X---c.2251C>T<br>139 = W1204X---p.Trp1204X---c.3811G>A<br>140 = W1204X---p.Trp1204X---c.3812G>A<br>141 = W1204X---p.Trp1204X---cDNA variant not spec<br>142 = 663delT---p.Ile177Met/c.12---c.531delT<br>143 = F1052V---p.Phe1052Val---c.3154T>G<br>144 = G330X---p.Gly330X---c.989C>T<br>145 = P205S---p.Phe205Ser---c.619C>T<br>146 = 1259insA---p.Gln378Ala/c.4---c.1127_1128insA<br>147 = 2585delT---p.Leu819Trp/c.3---c.2453delT<br>148 = 852delE2---p.Gly41Glu/c.13---c.720_741delE2<br>149 = E1104X---p.Glu1104X---c.3310G>T<br>150 = H199Y---p.His199Tyr---c.659C>T<br>151 = Q252X---p.Gln252X---c.1573G>T<br>152 = 1461ins4---p.Ile444Arg/c.3---c.1329_1330ins4<br>153 = 1898+3A>G---None---c.1766+3A>G<br>154 = 7T---None---c.1210-10T<br>155 = CFTRdel22-23---None---c.3964-78_4242+5del<br>156 = D614G---p.Asp614Gly---c.1814A>G<br>157 = L227R---p.Leu227Arg---c.680T>G<br>158 = L585S---p.Leu585Ser---c.1673T>C<br>159 = 1213delT---p.Trp361Gly/c.8---c.1091delT<br>160 = 1341+1G>A---None---c.1209+1G>A<br>161 = 1548delG---p.Gly473Glu/c.54---c.1418delG<br>162 = 1717-8G>A---None---c.1586-8G>A<br>163 = 3121-1G>A---None---c.2989-1G>A<br>164 = 4209TGT>AA---None---c.4077_4080delTGT<br>165 = 457TAT>G---p.Tyr109Gly/c.4---c.325_327GAT<br>166 = G1066R---p.Gly1066Arg---c.3205G>A<br>167 = G970R---p.Gly970Arg---c.2908C>G<br>168 = M1V---p.Met1Val---c.1A>G<br>169 = R1162L---p.Arg1162Leu---c.3485G>T<br>170 = R560K---p.Arg560Lys---c.1679G>A<br>171 = S341P---p.Ser341Pro---c.1021T>C<br>172 = S977F---p.Ser977Phe---c.2930C>T<br>173 = V754M---p.Val754Met---c.2260C>A<br>174 = Y569D---p.Tyr569Asp---c.1705T>G<br>175 = 2594delGT---p.Ser82Arg/c.4---c.2482_248delGT<br>176 = 4374+1G>T---None---c.4242+1G>T<br>177 = R786X---p.Arg786X---c.2935C>T<br>178 = 2055delA---p.Ser41Arg/c.5---c.1823_1179insA<br>179 = 2105-2117del13insAGAAA---p.Arg658Lys/c.4<br>180 = G515T---p.Gly515Ser---c.1651G>A<br>181 = A581E---p.Ala581Glu---c.1862C>A<br>182 = H1054D---p.His1054Asp---c.3160C>G<br>183 = 1288insTA---p.Asn389Ile/c.3---c.1153_1154insTA<br>184 = 1471delA---p.Lys147Arg/c.2---c.1340delA<br>185 = 444delA---p.Ile105Ser/c.2---c.313delA<br>186 = 3667ins4---p.Trp1179Ile/c.17---c.3535_3537ins4<br>187 = 3621delT---p.Ser1231Pro/c.4---c.3611delT<br>188 = 4326delTC---p.Cys1400X---c.4196_4197delTC<br>189 = R792X---p.Arg792X---c.2734C>T<br>190 = S612X---p.Ser612X---c.2735C>A<br>191 = C276X---p.Cys276X---c.828C>A<br>192 = 1811+1G>C---None---c.1679+1G>C<br>193 = 3650+1G>A---None---c.3718+1G>A<br>194 = 306insA---p.Arg59Lys/c.10---c.174_175insA<br>195 = A46D---p.Ala46Asp---c.137C>A<br>196 = 1782delA---p.Gly531Val/c.8---c.1650delA<br>197 = 2118del4---p.Trp663Arg/c.8---c.1986_1988del4<br>198 = 2869insG---p.Tyr193X---c.2737_2738insG<br>199 = 2869insAG---p.Val92Glu/c.5---c.2784_2786insAG<br>200 = 3133delTG---p.Val1001Asp/c.45---c.3002_3133delTG<br>201 = 3737delA---p.Asp1202Ala/c.9---c.3605delA<br>202 = Q144X---p.Gln144X---c.1540C>G<br>203 = S1255X---p.Ser1255X---c.3764C>A<br>204 = E50K---p.Glu50Lys---c.1680A>G<br>205 = G1061R---p.Gly1061Arg---c.3181G>C<br>206 = F1074L---p.Phe1074Leu---c.3222T>A<br>207 = G1349D---p.Gly1349Asp---c.4046G>A<br>208 = 4428insdA---p.Ser1453Gly/c.14---c.4296_4428insdA<br>209 = Y649X---p.Tyr649X---c.2547C>A<br>210 = E1371X---p.Glu1371X---c.4111G>T<br>211 = 1898+1G>C---None---c.1768+1G>C<br>212 = 2790-1G>C---None---c.2658-1G>C<br>213 = 287-1G>A---None---c.165-1G>A<br>214 = 1624delA---p.Asp666Met/c.7---c.1692delA<br>215 = 2559insAT---p.Ser809Ile/c.13---c.2424_2426insAT<br>216 = 3121-8T_3499+3del62915---None---c.2989_3121-8T_3499+3del62915<br>217 = 4015delA---p.Ile1295Phe/c.33---c.3883delA<br>218 = 675del4---p.Leu183Phe/c.5---c.543_546del4<br>219 = Y913X---p.Tyr913X---c.2738T>A<br>220 = Q1412X---p.Gln1412X---c.4234C>T<br>221 = S1255P---p.Ser1255Pro---c.3763T>C<br>222 = CFTRdel17a18---None---c.2989+1_2989+1del17a18<br>223 = CFTRdel2---None---c.[53+1_54-1]_[164+1-1]<br>224 = CFTRdel22-24---None---c.[395+1_396+1]<br>225 = L1254K---p.Leu1254X---c.3761T>G<br>226 = 1138insG---p.Ile536Ser/c.28---c.1006_1007insG<br>227 = 935delA---p.Asn268Ile/c.17---c.803delA<br>228 = 1161delC---p.Cys343X---c.1029delC<br>229 = 1609delCA---p.Gln493Val/c.10---c.1477_1479delCA<br>230 = CFTRdel14b-17b---None---c.[2619+1_2620+1]<br>231 = CFTRdel17a-17b---None---c.[2989+1_2989+1]<br>232 = E193X---p.Glu193X---c.577G>T |

|   |          |       |           |                        |  |        |  |  |  |
|---|----------|-------|-----------|------------------------|--|--------|--|--|--|
| 1 | Baseline | 1.2.1 | genospec2 | Specify other Genotype |  | string |  |  |  |
|---|----------|-------|-----------|------------------------|--|--------|--|--|--|

| 1 | Baseline | 1.3 | genotype3 | Genotype (Mutation 3) | option                                                                                                                                                                                                                                                                                                                                                                                                                                                                                                                                                                                                                                                                                                                                                                                                                                                                                                                                                                                                                                                                                                                                                                                                                                                                                                                                                                                                                                                                                                                                                                                                                                                                                                                                                                                                                                                                                                                                                                                                                                                                                                                                                                                                                                                                                                                                                                                                                                                                                                                                                                                                                                                                                                                                                                                                                                                                                                                                                                                                                                                                                                                                                                                                                                                                                                                                                                                                                                                                                                                                                                                                                                                                                                                                                                                                                                                                                                                                                                                                                                                                                                                                                                                                                                                                                                                                                                                                                                                                                                                                                                                                                                                                                                                                                                                                                                                                                                                                                                                                                                                                                                                                                                                                                                                                                                                                                                                                                                                                                                                                                                                                                                                                                                                                                                                                                                                                                                                                                                                                                                                                                                                                                                                                                                                                                                                                                                                                                                                                                                                                                                                                                                                                                                                                                                                                                                                                                                                                                                                                                                                                                                                                                                                                                                                                                                                                                                                                                                                                                                                                                                                                                                                                                                                                                                                                                                                                                                                                                                                                                                                                                                                                                                                                                                                                                                                                                                                                                                                                                                                                                                                                                                                                                                                                                                                                                                                                                                                                                                                                                                                                                                                                                                                                                                                                                                                                                                                                                                                                                                                                                                                                                                                                                                                                                                                                                                                                                                                                                                                                                                                                                                                                                                                                                                                                                                                                                                                                                                                                                                                                                                                                                                                                                                                                                                                                                                                                                                                                                                                                                                                                                                                                                                                                                                                                                                                                                                                                                                                                                                                                                                                                                                                                                                                                                                                                                                                                                                                                                                        |
|---|----------|-----|-----------|-----------------------|-------------------------------------------------------------------------------------------------------------------------------------------------------------------------------------------------------------------------------------------------------------------------------------------------------------------------------------------------------------------------------------------------------------------------------------------------------------------------------------------------------------------------------------------------------------------------------------------------------------------------------------------------------------------------------------------------------------------------------------------------------------------------------------------------------------------------------------------------------------------------------------------------------------------------------------------------------------------------------------------------------------------------------------------------------------------------------------------------------------------------------------------------------------------------------------------------------------------------------------------------------------------------------------------------------------------------------------------------------------------------------------------------------------------------------------------------------------------------------------------------------------------------------------------------------------------------------------------------------------------------------------------------------------------------------------------------------------------------------------------------------------------------------------------------------------------------------------------------------------------------------------------------------------------------------------------------------------------------------------------------------------------------------------------------------------------------------------------------------------------------------------------------------------------------------------------------------------------------------------------------------------------------------------------------------------------------------------------------------------------------------------------------------------------------------------------------------------------------------------------------------------------------------------------------------------------------------------------------------------------------------------------------------------------------------------------------------------------------------------------------------------------------------------------------------------------------------------------------------------------------------------------------------------------------------------------------------------------------------------------------------------------------------------------------------------------------------------------------------------------------------------------------------------------------------------------------------------------------------------------------------------------------------------------------------------------------------------------------------------------------------------------------------------------------------------------------------------------------------------------------------------------------------------------------------------------------------------------------------------------------------------------------------------------------------------------------------------------------------------------------------------------------------------------------------------------------------------------------------------------------------------------------------------------------------------------------------------------------------------------------------------------------------------------------------------------------------------------------------------------------------------------------------------------------------------------------------------------------------------------------------------------------------------------------------------------------------------------------------------------------------------------------------------------------------------------------------------------------------------------------------------------------------------------------------------------------------------------------------------------------------------------------------------------------------------------------------------------------------------------------------------------------------------------------------------------------------------------------------------------------------------------------------------------------------------------------------------------------------------------------------------------------------------------------------------------------------------------------------------------------------------------------------------------------------------------------------------------------------------------------------------------------------------------------------------------------------------------------------------------------------------------------------------------------------------------------------------------------------------------------------------------------------------------------------------------------------------------------------------------------------------------------------------------------------------------------------------------------------------------------------------------------------------------------------------------------------------------------------------------------------------------------------------------------------------------------------------------------------------------------------------------------------------------------------------------------------------------------------------------------------------------------------------------------------------------------------------------------------------------------------------------------------------------------------------------------------------------------------------------------------------------------------------------------------------------------------------------------------------------------------------------------------------------------------------------------------------------------------------------------------------------------------------------------------------------------------------------------------------------------------------------------------------------------------------------------------------------------------------------------------------------------------------------------------------------------------------------------------------------------------------------------------------------------------------------------------------------------------------------------------------------------------------------------------------------------------------------------------------------------------------------------------------------------------------------------------------------------------------------------------------------------------------------------------------------------------------------------------------------------------------------------------------------------------------------------------------------------------------------------------------------------------------------------------------------------------------------------------------------------------------------------------------------------------------------------------------------------------------------------------------------------------------------------------------------------------------------------------------------------------------------------------------------------------------------------------------------------------------------------------------------------------------------------------------------------------------------------------------------------------------------------------------------------------------------------------------------------------------------------------------------------------------------------------------------------------------------------------------------------------------------------------------------------------------------------------------------------------------------------------------------------------------------------------------------------------------------------------------------------------------------------------------------------------------------------------------------------------------------------------------------------------------------------------------------------------------------------------------------------------------------------------------------------------------------------------------------------------------------------------------------------------------------------------------------------------------------------------------------------------------------------------------------------------------------------------------------------------------------------------------------------------------------------------------------------------------------------------------------------------------------------------------------------------------------------------------------------------------------------------------------------------------------------------------------------------------------------------------------------------------------------------------------------------------------------------------------------------------------------------------------------------------------------------------------------------------------------------------------------------------------------------------------------------------------------------------------------------------------------------------------------------------------------------------------------------------------------------------------------------------------------------------------------------------------------------------------------------------------------------------------------------------------------------------------------------------------------------------------------------------------------------------------------------------------------------------------------------------------------------------------------------------------------------------------------------------------------------------------------------------------------------------------------------------------------------------------------------------------------------------------------------------------------------------------------------------------------------------------------------------------------------------------------------------------------------------------------------------------------------------------------------------------------------------------------------------------------------------------------------------------------------------------------------------------------------------------------------------------------------------------------------------------------------------------------------------------------------------------------------------------------------------------------------------------------------------------------------------------------------------------------------------------------------------------------------------------------------------------------------------------------------------------------------------------------------------------------------------------------------------------------------------------------------------------------------------------------------|
|   |          |     |           |                       | <p>1 = F508del... p.Phe508del... c.1521_1523delCTT<br/> 2 = G542X... p.Gly542X... c.1624G&gt;T<br/> 3 = G551D... p.Gly551Asp... c.1658G&gt;A<br/> 4 = N1303K... p.Asn1303Lys... c.3909C&gt;G<br/> 5 = W1282X... p.Trp1282X... c.3849G&gt;A...<br/> 6 = R1171H... p.Arg1171His... c.3503G&gt;A<br/> 7 = R1174T... p.Arg1174His... c.3503G&gt;A<br/> 8 = R1174T... p.Arg1174His... c.3503G&gt;A<br/> 9 = R553X... p.Arg553X... c.1617G&gt;T<br/> 10 = 1717-1G&gt;A... None... c.1585-1G&gt;A<br/> 11 = 621+1G&gt;T... None... c.489+1G&gt;T<br/> 12 = 2789+5G&gt;A... None... c.2827+5G&gt;A<br/> 13 = 3849+10kC&gt;T... None... c.3717+12191C&gt;T<br/> 14 = R1162X... p.Arg1162X... c.3484C&gt;T<br/> 15 = 2183A&gt;G... p.Val2183Ala... c.1595A&gt;G<br/> 16 = CFTRdel23... p.Ser184ArgfsX16... c.54-5940<br/> 17 = G85E... p.Gly85Glu... c.254G&gt;A<br/> 18 = 3120+1G&gt;A... None... c.2989+1G&gt;A<br/> 19 = I507del... p.Ile507del... c.1519_1521delATC<br/> 20 = 1899+1G&gt;A... None... c.1769+1G&gt;A<br/> 21 = 3659delC... p.Lys1175SerfsX15... c.828delC<br/> 22 = R347P... p.Arg347Pro... c.1040G&gt;C<br/> 23 = D1152H... p.Asp1152His... c.3454G&gt;C<br/> 24 = R560T... p.Arg560Thr... c.1879G&gt;C<br/> 25 = 3272-28A&gt;G... None... c.3140-28A&gt;G<br/> 26 = G493X... p.Gln493X... c.1477C&gt;T<br/> 27 = E20X... p.Glu20X... c.176C&gt;T<br/> 28 = R334W... p.Arg334Trp... c.1000C&gt;T<br/> 29 = 394delT... p.Leu88IlefsX22... c.262_263delTT<br/> 30 = 2184delA... p.Gln831TrpfsX2... c.2092_2093delAA<br/> 31 = 5T1G11... None... c.[1210-125];[1210-34TQ]1<br/> 32 = 5T1G12... None... c.[1210-125];[1210-34TQ]2<br/> 33 = 5T1G13... None... c.[1210-125];[1210-34TQ]3<br/> 34 = 5T1G not specified... None... c.1210-125<br/> 35 = 3905insT... p.Leu1258PhefsX7... c.3773_3774insT<br/> 36 = Y1092X... p.Tyr1092X... c.3278C&gt;G<br/> 37 = Y1092X... p.Tyr1092X... c.3278C&gt;G<br/> 38 = Y1092X... p.Tyr1092X... cDNA variant not spec<br/> 39 = A45E... p.Ala45Glu... c.136C&gt;A<br/> 40 = 2184delA... p.Lys984AsnfsX8... c.2052delA<br/> 41 = R1066C... p.Arg1066Cys... c.3196C&gt;T<br/> 42 = 1075delT... p.Phe319LeuX12... c.94delT<br/> 43 = 1154insTC... p.Phe342HisfsX28... c.1022_102delTC<br/> 44 = R1158X... p.Arg1158X... c.3472C&gt;T<br/> 45 = R347H... p.Arg347His... c.1040G&gt;C<br/> 46 = S1251N... p.Ser1251Asn... c.3782G&gt;A<br/> 47 = L208W... p.Leu208Trp... c.617T&gt;G<br/> 48 = S549R... p.Ser549Arg... c.1646G&gt;A<br/> 49 = M1101K... p.Met1101Lys... c.3302T&gt;A<br/> 50 = 711-1G&gt;T... None... c.579+1G&gt;T<br/> 51 = Y122X... p.Tyr122X... c.367T&gt;A<br/> 52 = 2143delT... p.Leu671X... c.2072delT<br/> 53 = S945L... p.Ser945Leu... c.2834C&gt;T<br/> 54 = I148T... p.Ile148Thr... c.443T&gt;C<br/> 55 = R117C... p.Arg117Cys... c.349C&gt;T<br/> 56 = V52F... p.Val52Phe... c.1593G&gt;T<br/> 57 = S1235R... p.Ser1235Arg... c.3705T&gt;G<br/> 58 = T338I... p.Trp338Ile... c.1013C&gt;T<br/> 59 = P61L... p.Phe61Leu... c.230C&gt;T<br/> 60 = G124E... p.Gly124Glu... c.3731G&gt;A<br/> 61 = G178R... p.Gly178Arg... c.532G&gt;A<br/> 62 = 1677delTA... p.Tyr151X... c.1545_1546delTA<br/> 63 = R352Q... p.Arg352Gln... c.1055G&gt;A<br/> 64 = 711+5G&gt;A... None... c.579+5G&gt;A<br/> 65 = R686C... p.Arg686Cys... c.2302C&gt;T<br/> 66 = S549R... p.Ser549Arg... c.1645A&gt;C<br/> 67 = S549R... p.Ser549Arg... c.1647T&gt;G<br/> 68 = S549R... p.Ser549Arg... cDNA variant not spec<br/> 69 = A559T... p.Ala559Thr... c.1675G&gt;A<br/> 70 = L1077P... p.Leu1077Pro... c.3207C&gt;C<br/> 71 = W1282X... p.Trp1282X... c.3286G&gt;A<br/> 72 = I1027T... p.Ile1027Thr... c.3080T&gt;C<br/> 73 = G576A... p.Gly576Ala... c.1727G&gt;C<br/> 74 = M470V... p.Met470Val... c.1408A&gt;G<br/> 75 = 3120G&gt;A... None... c.2988G&gt;A<br/> 76 = R75X... p.Arg75X... c.223C&gt;T<br/> 77 = W848X... p.Trp848X... c.2537G&gt;A<br/> 78 = E585X... p.Glu585X... c.1753G&gt;T<br/> 79 = 1811+1.6kA&gt;G... None... c.1679+1.6kA&gt;G<br/> 80 = 4362delA... p.Lys1525ArgfsX9... c.374delA<br/> 81 = D1270N... p.Asp1270Asn... c.3808G&gt;A<br/> 82 = G220X... p.Gln220X... c.568C&gt;T<br/> 83 = 2307insA... p.Glu284GlyfsX4... c.2175_2176insA<br/> 84 = D110H... p.Asp110His... c.328G&gt;C<br/> 85 = 4016insT... p.Ser1297PhefsX5... c.3884_3885insT<br/> 86 = 4362delA... p.Lys1525ArgfsX9... c.4251delA<br/> 87 = I336K... p.Ile336Lys... c.1007T&gt;A<br/> 88 = R1066H... p.Arg1066His... c.3197G&gt;A<br/> 89 = 2347delG... p.Leu1079PheX16... c.2215delG<br/> 90 = L997F... p.Leu997Phe... c.2991G&gt;C<br/> 91 = K710X... p.Lys710X... c.2128A&gt;T<br/> 92 = E92X... p.Glu92X... c.2484G&gt;T<br/> 93 = L1065P... p.Leu1065Pro... c.3194T&gt;C<br/> 94 = Q552X... p.Gln552X... c.1654C&gt;T<br/> 95 = R740V... p.Arg740Val... c.2293C&gt;T<br/> 96 = 2622+1G&gt;A... None... c.2490+1G&gt;A<br/> 97 = 2789+2insA... None... c.2657+2_2657+3insA<br/> 98 = E20X... p.Glu20X... c.274G&gt;T<br/> 99 = Q39X... p.Gln39X... c.115C&gt;T<br/> 100 = R75Q... p.Arg75Gln... c.224G&gt;A<br/> 101 = D578G... p.Asp578Gly... c.1786G&gt;A<br/> 102 = E831X... p.Glu831X... c.2491G&gt;T<br/> 103 = 3007delG... p.Ala959IlefsX9... c.2875delG<br/> 104 = 405+1G&gt;A... None... c.273+1G&gt;A<br/> 105 = 406-1G&gt;A... None... c.274-1G&gt;A<br/> 106 = 711+3A&gt;X... None... c.579+3A&gt;X<br/> 107 = Q131X... p.Gln131X... c.3937C&gt;T<br/> 108 = R709X... p.Arg709X... c.2125C&gt;T<br/> 109 = 271delT... p.Phe61LeuX3... c.2583delT<br/> 110 = 405+1G&gt;A... None... c.281+1G&gt;A<br/> 111 = 574delA... p.Ile148LeufsX5... c.442delA<br/> 112 = 1525-1G&gt;A... None... c.1393-1G&gt;A<br/> 113 = 1812-1G&gt;A... None... c.1683-1G&gt;A<br/> 114 = I1234V... p.Ile1234Val... c.3700A&gt;G<br/> 115 = R1670Q... p.Arg1670Gln... c.3209G&gt;A<br/> 116 = S46X... p.Ser46X... c.139T&gt;C<br/> 117 = S466X... p.Ser466X... c.1397C&gt;G<br/> 118 = S466X... p.Ser466X... cDNA variant not spec<br/> 119 = S466X... p.Ser466X... c.1466C&gt;A<br/> 120 = L467P... p.Leu467Pro... c.1400T&gt;C<br/> 121 = S492F... p.Ser492Phe... c.1475C&gt;T<br/> 122 = 3731delC... p.Trp1221LysfsX9... c.3599delC<br/> 123 = L927P... p.Leu927Pro... c.2780T&gt;C<br/> 124 = 712-1G&gt;T... None... c.580-1G&gt;T<br/> 125 = E92X... p.Glu92X... c.274G&gt;T<br/> 126 = Q359K/T360K... p.(Gln359Lys,Thr360Lys)... c.1269C&gt;T<br/> 127 = Q890K... p.Gln890X... c.2668C&gt;T<br/> 128 = R74X... p.Arg74X... c.229C&gt;T<br/> 129 = S1196K... p.Ser1196X... c.3587C&gt;G<br/> 130 = W401X... p.Trp401X... c.1203G&gt;A<br/> 131 = W401X... p.Trp401X... c.1203G&gt;A<br/> 132 = W401X... p.Trp401X... cDNA variant not spec<br/> 133 = 1248-1G&gt;A... None... c.1118-1G&gt;A<br/> 134 = L732X... p.Leu732X... c.2195T&gt;G<br/> 135 = Q98X... p.Gln98X... c.292C&gt;T<br/> 136 = R1070H... p.Arg1070His... c.3209C&gt;T<br/> 137 = R31C... p.Arg31Cys... c.91C&gt;T<br/> 138 = R651X... p.Arg651X... c.2251C&gt;T<br/> 139 = W1204X... p.Trp1204X... c.3811G&gt;A<br/> 140 = W1204X... p.Trp1204X... c.3812G&gt;A<br/> 141 = W1204X... p.Trp1204X... cDNA variant not spec<br/> 142 = 663delT... p.Ile177MetfsX12... c.531delT<br/> 143 = F1052V... p.Phe1052Val... c.3154T&gt;G<br/> 144 = G330X... p.Gly330X... c.989C&gt;T<br/> 145 = P205S... p.Pro205Ser... c.619C&gt;T<br/> 146 = 1259insA... p.Gln378AlafsX4... c.1127_1128insA<br/> 147 = 2585delT... p.Leu819IlefsX3... c.2453delT<br/> 148 = 852delE... p.Gly41GluX13... c.720_741delE<br/> 149 = E1104X... p.Glu1104X... c.3310G&gt;T<br/> 150 = H199Y... p.His199Tyr... c.659C&gt;T<br/> 151 = Q252X... p.Gln252X... c.1573G&gt;T<br/> 152 = 1461ins4... p.Ile444ArgfsX3... c.1329_1330ins4<br/> 153 = 1898+3A&gt;G... None... c.1766+3A&gt;G<br/> 154 = 7T... None... c.1210-10T<br/> 155 = CFTRdel22 23... None... c.3964-78_4242+5<br/> 156 = D614G... p.Asp614Gly... c.1884A&gt;G<br/> 157 = L227R... p.Leu227Arg... c.680T&gt;G<br/> 158 = L585S... p.Leu585Ser... c.1673T&gt;C<br/> 159 = 1213delT... p.Trp326IlefsX8... c.1091delT<br/> 160 = 1341+1G&gt;A... None... c.1209+1G&gt;A<br/> 161 = 1548delG... p.Gly473GluXfsX4... c.1418delG<br/> 162 = 1717-8G&gt;A... None... c.1586-8G&gt;A<br/> 163 = 3121-1G&gt;A... None... c.2989-1G&gt;A<br/> 164 = 4209TGT&gt;AA... None... c.4077_4080delTGT<br/> 165 = 457TAT&gt;G... p.Tyr109GlyfsX4... c.325_327GAT<br/> 166 = G1066R... p.Gly1066Arg... c.3205G&gt;A<br/> 167 = G970R... p.Gly970Arg... c.2908C&gt;G<br/> 168 = M1V... p.Met1Val... c.1A&gt;G<br/> 169 = R1162L... p.Arg1162Leu... c.3485G&gt;T<br/> 170 = R560K... p.Arg560Lys... c.1679G&gt;A<br/> 171 = S341P... p.Ser341Pro... c.1021T&gt;C<br/> 172 = S977F... p.Ser977Phe... c.2930C&gt;T<br/> 173 = V754M... p.Val754Met... c.2260C&gt;A<br/> 174 = Y569D... p.Tyr569Asp... c.1705T&gt;G<br/> 175 = 2594delGT... p.Ser82ArgfsX4... c.2482_248delGT<br/> 176 = 4374+1G&gt;T... None... c.4242+1G&gt;T<br/> 177 = R786X... p.Arg786X... c.2935C&gt;T<br/> 178 = 2055delA... p.Ser41ArgfsX5... c.1823_1824delA<br/> 179 = 2105-2117del13nsAGAAA... p.Arg658LysfsX4<br/> 180 = G515T... p.Gly515Ser... c.1651G&gt;A<br/> 181 = A581E... p.Ala581Glu... c.186C&gt;A<br/> 182 = H1054D... p.His1054Asp... c.3180C&gt;G<br/> 183 = 1288insTA... p.Asn389IlefsX3... c.1153_1154insTA<br/> 184 = 1471delA... p.Lys147ArgfsX2... c.1340delA<br/> 185 = 444delA... p.Ile105SerfsX2... c.313delA<br/> 186 = 3667ins4... p.Trp1179IlefsX17... c.3535_3538ins4<br/> 187 = 3621delT... p.Ser1231ProfsX4... c.3611delT<br/> 188 = 4326delTC... p.Cys1400X... c.4196_4197delTC<br/> 189 = R792X... p.Arg792X... c.2374C&gt;T<br/> 190 = S612X... p.Ser612X... c.2735C&gt;A<br/> 191 = C276X... p.Cys276X... c.828C&gt;A<br/> 192 = 1811+1G&gt;C... None... c.1679+1G&gt;C<br/> 193 = 3650-1G&gt;A... None... c.3718-1G&gt;A<br/> 194 = 306insA... p.Arg59LysfsX10... c.174_175insA<br/> 195 = A46D... p.Ala46Asp... c.137C&gt;A<br/> 196 = 1782delA... p.Gly531IlefsX8... c.1650delA<br/> 197 = 2118del4... p.Trp663ArgfsX8... c.1986_1989del4<br/> 198 = 2869insG... p.Tyr193X... c.2737_2738insG<br/> 199 = 2869insAG... p.Val922GluX5... c.2784_2786insAG<br/> 200 = 3133delTG... p.Val1001AspfsX45... c.3002_3133delTG<br/> 201 = 3737delA... p.Asp1202AlafsX9... c.3605delA<br/> 202 = Q144X... p.Gln144X... c.134G&gt;C<br/> 203 = S1255X... p.Ser1255X... c.3764C&gt;A<br/> 204 = E59K... p.Glu59Lys... c.180G&gt;A<br/> 205 = G1961R... p.Gly1961Arg... c.3181G&gt;C<br/> 206 = F1074L... p.Phe1074Leu... c.3222T&gt;A<br/> 207 = G1349D... p.Gly1349Asp... c.4046G&gt;A<br/> 208 = 4428insdA... p.Ser1453GlyfsX14... c.4296_4428insdA<br/> 209 = Y849X... p.Tyr849X... c.2547C&gt;A<br/> 210 = E1371X... p.Glu1371X... c.4111G&gt;T<br/> 211 = 1898-1G&gt;C... None... c.1768-1G&gt;C<br/> 212 = 2790-1G&gt;C... None... c.2658-1G&gt;C<br/> 213 = 287-1G&gt;A... None... c.165-1G&gt;A<br/> 214 = 1624delA... p.Asp666MetfsX7... c.1692delA<br/> 215 = 2559insAT... p.Ser809IlefsX13... c.2424_2426insAT<br/> 216 = 3121-87T_3499+3del62915... None... c.2989<br/> 217 = 4015delA... p.Ile1295PhefsX33... c.3883delA<br/> 218 = 675del4... p.Leu183PhefsX5... c.543_546del4<br/> 219 = Y913X... p.Tyr913X... c.2738T&gt;A<br/> 220 = Q1412X... p.Gln1412X... c.4234C&gt;T<br/> 221 = S1255P... p.Ser1255Pro... c.3763T&gt;C<br/> 222 = CFTRdel17a18... None... c.2989+1_2989+1del17a18<br/> 223 = CFTRdel2... None... c.[53+1_54-1];[164+1]<br/> 224 = CFTRdel22-24... None... c.[395+1_396+1]<br/> 225 = L1254X... p.Leu1254X... c.3761T&gt;G<br/> 226 = 1138insG... p.Ile536SerfsX28... c.1006_1007insG<br/> 227 = 935delA... p.Asn268IlefsX17... c.803delA<br/> 228 = 1161delC... p.Cys343X... c.1029delC<br/> 229 = 1609delCA... p.Gln493ValfsX10... c.1477_1479delCA<br/> 230 = CFTRdel14b-17b... None... c.[2619+1_2620+1]<br/> 231 = CFTRdel17a-17b... None... c.[2989+1_2989+1]<br/> 232 = E193X... p.Glu193X... c.577G&gt;T</p> |

|     |                                     |          |                                  |                                                                                                                                                          |                        |         |             |        |                                                                                                                                                                                                                                                                                                                                                                                                                                                                                                                                                                                                                                                                                                                                                                                                                                                                                                                                                                               |
|-----|-------------------------------------|----------|----------------------------------|----------------------------------------------------------------------------------------------------------------------------------------------------------|------------------------|---------|-------------|--------|-------------------------------------------------------------------------------------------------------------------------------------------------------------------------------------------------------------------------------------------------------------------------------------------------------------------------------------------------------------------------------------------------------------------------------------------------------------------------------------------------------------------------------------------------------------------------------------------------------------------------------------------------------------------------------------------------------------------------------------------------------------------------------------------------------------------------------------------------------------------------------------------------------------------------------------------------------------------------------|
| 1   | Baseline                            | 1.3.1    | genospec3                        | Specify other Genotype                                                                                                                                   |                        |         | string      |        |                                                                                                                                                                                                                                                                                                                                                                                                                                                                                                                                                                                                                                                                                                                                                                                                                                                                                                                                                                               |
| 1   | Baseline                            | 1.4      | sweat_chloride_level             | Sweat chloride level                                                                                                                                     |                        |         | integer     | mmol/L |                                                                                                                                                                                                                                                                                                                                                                                                                                                                                                                                                                                                                                                                                                                                                                                                                                                                                                                                                                               |
| 1   | Baseline                            | 1.4      | sweat_chloride_level_na          | N/A                                                                                                                                                      |                        |         | checkbox    |        | 0 = Yes<br>1 = No                                                                                                                                                                                                                                                                                                                                                                                                                                                                                                                                                                                                                                                                                                                                                                                                                                                                                                                                                             |
| 1   | Baseline                            | 2.1      | paninsuff                        | Does this patient have pancreatic insufficiency (e.g. faecal elastase < 200)?                                                                            |                        |         | boolean     |        | 1 = Yes<br>0 = No                                                                                                                                                                                                                                                                                                                                                                                                                                                                                                                                                                                                                                                                                                                                                                                                                                                                                                                                                             |
| 1   | Baseline                            | 2.2      | cfdiab                           | Does this patient have CF related diabetes (prescribed regular insulin)?                                                                                 |                        |         | boolean     |        | 1 = Yes<br>0 = No                                                                                                                                                                                                                                                                                                                                                                                                                                                                                                                                                                                                                                                                                                                                                                                                                                                                                                                                                             |
| 1   | Baseline                            | 2.3      | height                           | Height                                                                                                                                                   | Height at presentation | decimal | cm          |        |                                                                                                                                                                                                                                                                                                                                                                                                                                                                                                                                                                                                                                                                                                                                                                                                                                                                                                                                                                               |
| 1   | Baseline                            | 2.4      | weight                           | Weight                                                                                                                                                   | Weight at presentation | decimal | kg          |        |                                                                                                                                                                                                                                                                                                                                                                                                                                                                                                                                                                                                                                                                                                                                                                                                                                                                                                                                                                               |
| 1   | Baseline                            | 3.1      | abxreact                         | Are there any antibiotics contraindicated for this participant because of previous reactions or a high susceptibility to toxicity e.g. renal impairment? |                        |         | boolean     |        | 1 = Yes<br>0 = No                                                                                                                                                                                                                                                                                                                                                                                                                                                                                                                                                                                                                                                                                                                                                                                                                                                                                                                                                             |
| 1   | Baseline                            | 3.1.1    | abxreactrt                       | Has the participant had a reaction relevant to the future safe use of any of the following antibiotics?                                                  |                        |         | boolean     |        | 1 = Yes<br>0 = No                                                                                                                                                                                                                                                                                                                                                                                                                                                                                                                                                                                                                                                                                                                                                                                                                                                                                                                                                             |
| 2   | Clinic Visit                        | 1.1      | cvdat                            | Date of clinic visit                                                                                                                                     |                        |         | date        |        |                                                                                                                                                                                                                                                                                                                                                                                                                                                                                                                                                                                                                                                                                                                                                                                                                                                                                                                                                                               |
| 2   | Clinic Visit                        | 1.2      | cvpladmyn                        | Have any admissions for the near future been planned at this clinic visit?                                                                               |                        |         | boolean     |        | 1 = Yes<br>0 = No                                                                                                                                                                                                                                                                                                                                                                                                                                                                                                                                                                                                                                                                                                                                                                                                                                                                                                                                                             |
| 2   | Clinic Visit                        | 1.2.1    | cvpladmdat                       | Date of planned admission                                                                                                                                |                        |         | date        |        |                                                                                                                                                                                                                                                                                                                                                                                                                                                                                                                                                                                                                                                                                                                                                                                                                                                                                                                                                                               |
| 2   | Clinic Visit                        | 1.3      | cvhgtupdyn                       | Previous height recorded is % [previous_height] cm, does this need to be updated?                                                                        |                        |         | boolean     |        | 1 = Yes<br>0 = No                                                                                                                                                                                                                                                                                                                                                                                                                                                                                                                                                                                                                                                                                                                                                                                                                                                                                                                                                             |
| 2   | Clinic Visit                        | 1.3.1    | cvhgt                            | Height                                                                                                                                                   |                        | decimal | cm          |        |                                                                                                                                                                                                                                                                                                                                                                                                                                                                                                                                                                                                                                                                                                                                                                                                                                                                                                                                                                               |
| 2   | Clinic Visit                        | 1.4      | cvwgtupdyn                       | Previous weight recorded is % [previous_weight] kg, does this need to be updated?                                                                        |                        |         | boolean     |        | 1 = Yes<br>0 = No                                                                                                                                                                                                                                                                                                                                                                                                                                                                                                                                                                                                                                                                                                                                                                                                                                                                                                                                                             |
| 2   | Clinic Visit                        | 1.4.1    | cvwgt                            | Weight                                                                                                                                                   |                        | decimal | kg          |        |                                                                                                                                                                                                                                                                                                                                                                                                                                                                                                                                                                                                                                                                                                                                                                                                                                                                                                                                                                               |
| 2   | Clinic Visit                        | 1.5      | cvpaninsuff                      | Does this patient have pancreatic insufficiency (faecal elastase < 200)?                                                                                 |                        |         | boolean     |        | 1 = Yes<br>0 = No                                                                                                                                                                                                                                                                                                                                                                                                                                                                                                                                                                                                                                                                                                                                                                                                                                                                                                                                                             |
| 2   | Clinic Visit                        | 1.6      | cvctdiab                         | Does this patient have CF related diabetes (prescribed regular insulin)?                                                                                 |                        |         | boolean     |        | 1 = Yes<br>0 = No                                                                                                                                                                                                                                                                                                                                                                                                                                                                                                                                                                                                                                                                                                                                                                                                                                                                                                                                                             |
| 2   | Clinic Visit                        | 2.1      | cvfev1                           | Any FEV1 results since the last visit on % [previous_visit_date], including this current visit?                                                          |                        |         | boolean     |        | 1 = Yes<br>0 = No                                                                                                                                                                                                                                                                                                                                                                                                                                                                                                                                                                                                                                                                                                                                                                                                                                                                                                                                                             |
| 2   | Clinic Visit                        | 3.1      | cvmicrochg                       | Have any new airway samples for microbiology been taken and tested?                                                                                      |                        |         | boolean     |        | 1 = Yes<br>0 = No                                                                                                                                                                                                                                                                                                                                                                                                                                                                                                                                                                                                                                                                                                                                                                                                                                                                                                                                                             |
| 2   | Clinic Visit                        | 3.2      | cvcmchg                          | Have there been any changes to Concomitant Medications?                                                                                                  |                        |         | boolean     |        | 1 = Yes<br>0 = No                                                                                                                                                                                                                                                                                                                                                                                                                                                                                                                                                                                                                                                                                                                                                                                                                                                                                                                                                             |
| 2   | Clinic Visit                        | 3.3      | cvcichg                          | Have there been any changes to Antibiotic Contraindications?                                                                                             |                        |         | boolean     |        | 1 = Yes<br>0 = No                                                                                                                                                                                                                                                                                                                                                                                                                                                                                                                                                                                                                                                                                                                                                                                                                                                                                                                                                             |
| 3.1 | Airway Samples for Microbiology     | 1.1      | sample_date                      | Date                                                                                                                                                     |                        |         | date        |        |                                                                                                                                                                                                                                                                                                                                                                                                                                                                                                                                                                                                                                                                                                                                                                                                                                                                                                                                                                               |
| 3.1 | Airway Samples for Microbiology     | 1.2      | sample_type                      | Type                                                                                                                                                     |                        |         | option      |        | 1 = Expectorated sputum<br>2 = Oropharyngeal swab<br>3 = Bronchoalveolar lavage<br>4 = Induced sputum<br>5 = Laryngopharyngeal suction<br>6 = Nasopharyngeal swab                                                                                                                                                                                                                                                                                                                                                                                                                                                                                                                                                                                                                                                                                                                                                                                                             |
| 3.1 | Airway Samples for Microbiology     | 1.3      | sample_source                    | Source                                                                                                                                                   |                        |         | string      |        |                                                                                                                                                                                                                                                                                                                                                                                                                                                                                                                                                                                                                                                                                                                                                                                                                                                                                                                                                                               |
| 3.1 | Airway Samples for Microbiology     | 1.4      | growth_detected                  | Growth detected                                                                                                                                          |                        |         | boolean     |        | 1 = Yes<br>0 = No                                                                                                                                                                                                                                                                                                                                                                                                                                                                                                                                                                                                                                                                                                                                                                                                                                                                                                                                                             |
| 3.1 | Airway Samples for Microbiology     | 1.4.1    | organism_count                   | No. of distinct organism types detected                                                                                                                  |                        |         | integer     |        |                                                                                                                                                                                                                                                                                                                                                                                                                                                                                                                                                                                                                                                                                                                                                                                                                                                                                                                                                                               |
| 3.2 | Micro-organisms from Airway Samples | 1.1      | sample_id                        | Sample                                                                                                                                                   |                        |         | linked_form |        |                                                                                                                                                                                                                                                                                                                                                                                                                                                                                                                                                                                                                                                                                                                                                                                                                                                                                                                                                                               |
| 3.2 | Micro-organisms from Airway Samples | 1.2      | organism_type                    | Organism type                                                                                                                                            |                        |         | option      |        | 1 = Pseudomonas<br>2 = Staphylococcus<br>3 = Haemophilus<br>4 = Pneumococcus<br>5 = Stenotrophomonas<br>6 = Acinetobacter<br>7 = Burkholderia<br>8 = Mycobacterium<br>9 = Mixed oral flora/URTF<br>99 = Other bacteria<br>101 = Adenovirus<br>102 = Boccavirus<br>103 = Coronavirus (not SARS-CoV-2)<br>107 = COVID-19 (SARS-CoV-2)<br>104 = Enterovirus<br>105 = Influenza (type not specified)<br>106 = Influenza type A<br>108 = Influenza type B<br>109 = Metapneumovirus<br>110 = Parainfluenza (type not specified)<br>111 = Parainfluenza type 1<br>112 = Parainfluenza type 2<br>113 = Parainfluenza type 3<br>114 = Parainfluenza type 4<br>115 = Rhinovirus<br>116 = RSV (Respiratory syncytial virus) (type not spec)<br>117 = RSV (Respiratory syncytial virus) type A<br>118 = RSV (Respiratory syncytial virus) type B<br>199 = Other virus<br>201 = microplasma<br>202 = legionella<br>203 = chlamydia<br>7 = Aspergillus<br>11 = Candida<br>399 = Other fungi |
| 3.2 | Micro-organisms from Airway Samples | 1.2a     | organism_type_oth                | Other                                                                                                                                                    |                        |         | string      |        |                                                                                                                                                                                                                                                                                                                                                                                                                                                                                                                                                                                                                                                                                                                                                                                                                                                                                                                                                                               |
| 3.2 | Micro-organisms from Airway Samples | 1.2b     | organism_description             | Description                                                                                                                                              |                        |         | string      |        |                                                                                                                                                                                                                                                                                                                                                                                                                                                                                                                                                                                                                                                                                                                                                                                                                                                                                                                                                                               |
| 3.2 | Micro-organisms from Airway Samples | 1.2.1    | organism_esbl_detected           | ESBL detected for this organism?                                                                                                                         |                        |         | boolean     |        | 1 = Yes<br>0 = No                                                                                                                                                                                                                                                                                                                                                                                                                                                                                                                                                                                                                                                                                                                                                                                                                                                                                                                                                             |
| 3.2 | Micro-organisms from Airway Samples | 1.2.2    | mucoic_status                    | Mucoid status                                                                                                                                            |                        |         | option      |        | 1 = Mucoid<br>2 = Not mucoid<br>3 = Not reported                                                                                                                                                                                                                                                                                                                                                                                                                                                                                                                                                                                                                                                                                                                                                                                                                                                                                                                              |
| 3.2 | Micro-organisms from Airway Samples | 1.2.3    | mrsa_status                      | MRSA                                                                                                                                                     |                        |         | option      |        | -1 = Not reported<br>0 = No<br>1 = Yes                                                                                                                                                                                                                                                                                                                                                                                                                                                                                                                                                                                                                                                                                                                                                                                                                                                                                                                                        |
| 3.2 | Micro-organisms from Airway Samples | 1.3      | antibiotic_susceptibility_tested | Has any antibiotic susceptibility testing been done for this organism?                                                                                   |                        |         | boolean     |        | 1 = Yes<br>0 = No                                                                                                                                                                                                                                                                                                                                                                                                                                                                                                                                                                                                                                                                                                                                                                                                                                                                                                                                                             |
| 3.2 | Micro-organisms from Airway Samples | 1.3.1.1  | antibiotic_type_1                | Antibiotic type 1                                                                                                                                        |                        |         | option      |        | 1 = Amoxicillin<br>2 = Amoxicillin clavulanate<br>4 = Amikacin<br>5 = Amphotericin B<br>6 = Ampicillin<br>7 = Azithromycin<br>8 = Aztreonam<br>12 = Cefepime<br>13 = Ceftriaxime<br>14 = Ceftazidime<br>15 = Ceftazidime<br>59 = Ceftazidime/avibactam<br>16 = Cephalosporin<br>19 = Ciprofloxacin<br>21 = Clindamycin<br>22 = Colistin<br>23 = Cotrimoxazole (Trimethoprim and sulfamethoxazole)<br>28 = Erythromycin<br>29 = Fluoroquinolone<br>32 = Fusidic acid<br>33 = Gentamicin<br>34 = Imipenem<br>35 = Itraconazole<br>38 = Meropenem<br>58 = Methicillin<br>41 = Moxifloxacin<br>45 = Ofloxacin<br>46 = Penicillin/benzylpenicillin<br>47 = Piperacillin tazobactam (Tazocin)<br>48 = Fosfomic acid<br>49 = Rifampicin<br>52 = Ticarcillin clavulanate (Timentin)<br>53 = Tigecycline<br>54 = Tobramycin<br>56 = Vancomycin<br>57 = Voriconazole<br>999 = Other                                                                                                     |
| 3.2 | Micro-organisms from Airway Samples | 1.3.1.1a | antibiotic_type_other_1          | Antibiotic type other 1                                                                                                                                  |                        |         | string      |        |                                                                                                                                                                                                                                                                                                                                                                                                                                                                                                                                                                                                                                                                                                                                                                                                                                                                                                                                                                               |
| 3.2 | Micro-organisms from Airway Samples | 1.3.1.2  | antibiotic_susceptibility_1      | Antibiotic susceptibility 1                                                                                                                              |                        |         | option      |        | 2 = Susceptible<br>3 = Intermediate<br>4 = Resistant<br>5 = Susceptible/Intermediate<br>6 = Intermediate/Resistant                                                                                                                                                                                                                                                                                                                                                                                                                                                                                                                                                                                                                                                                                                                                                                                                                                                            |
| 3.2 | Micro-organisms from Airway Samples | 1.3.2.1  | antibiotic_type_2                | Antibiotic type 2                                                                                                                                        |                        |         | option      |        | 1 = Amoxicillin<br>2 = Amoxicillin clavulanate<br>4 = Amikacin<br>5 = Amphotericin B<br>6 = Ampicillin<br>7 = Azithromycin<br>8 = Aztreonam<br>12 = Cefepime<br>13 = Ceftriaxime<br>14 = Ceftazidime<br>15 = Ceftazidime<br>59 = Ceftazidime/avibactam<br>16 = Cephalosporin<br>19 = Ciprofloxacin<br>21 = Clindamycin<br>22 = Colistin<br>23 = Cotrimoxazole (Trimethoprim and sulfamethoxazole)<br>28 = Erythromycin<br>29 = Fluoroquinolone<br>32 = Fusidic acid<br>33 = Gentamicin<br>34 = Imipenem<br>35 = Itraconazole<br>38 = Meropenem<br>58 = Methicillin<br>41 = Moxifloxacin<br>45 = Ofloxacin<br>46 = Penicillin/benzylpenicillin<br>47 = Piperacillin tazobactam (Tazocin)<br>48 = Fosfomic acid<br>49 = Rifampicin<br>52 = Ticarcillin clavulanate (Timentin)<br>53 = Tigecycline<br>54 = Tobramycin<br>56 = Vancomycin<br>57 = Voriconazole<br>999 = Other                                                                                                     |
| 3.2 | Micro-organisms from Airway Samples | 1.3.2.1a | antibiotic_type_other_2          | Antibiotic type other 2                                                                                                                                  |                        |         | string      |        |                                                                                                                                                                                                                                                                                                                                                                                                                                                                                                                                                                                                                                                                                                                                                                                                                                                                                                                                                                               |
| 3.2 | Micro-organisms from Airway Samples | 1.3.2.2  | antibiotic_susceptibility_2      | Antibiotic susceptibility 2                                                                                                                              |                        |         | option      |        | 2 = Susceptible<br>3 = Intermediate<br>4 = Resistant<br>5 = Susceptible/Intermediate<br>6 = Intermediate/Resistant                                                                                                                                                                                                                                                                                                                                                                                                                                                                                                                                                                                                                                                                                                                                                                                                                                                            |

|     |                                     |          |                             |                             |  |        |  |                                                                                                                                                                                                                                                                                                                                                                                                                                                                                                                                                                                                                                                                                                                                                                                                                                                                                                                                                                                                                                                                                                                                               |
|-----|-------------------------------------|----------|-----------------------------|-----------------------------|--|--------|--|-----------------------------------------------------------------------------------------------------------------------------------------------------------------------------------------------------------------------------------------------------------------------------------------------------------------------------------------------------------------------------------------------------------------------------------------------------------------------------------------------------------------------------------------------------------------------------------------------------------------------------------------------------------------------------------------------------------------------------------------------------------------------------------------------------------------------------------------------------------------------------------------------------------------------------------------------------------------------------------------------------------------------------------------------------------------------------------------------------------------------------------------------|
| 3.2 | Micro-organisms from Airway Samples | 1.3.3.1  | antibiotic_type_3           | Antibiotic type 3           |  | option |  | <ul style="list-style-type: none"> <li>1 = Amoxicillin</li> <li>2 = Amoxicillin clavulanate</li> <li>4 = Amikacin</li> <li>5 = Amphotericin B</li> <li>6 = Ampicillin</li> <li>7 = Azithromycin</li> <li>8 = Aztreonam</li> <li>12 = Cefepime</li> <li>13 = Cefotaxime</li> <li>14 = Ceftriaxone</li> <li>15 = Ceftazidime</li> <li>59 = Ceftazidime/avibactam</li> <li>16 = Cephalexin</li> <li>19 = Ciprofloxacin</li> <li>21 = Clindamycin</li> <li>22 = Colistin</li> <li>23 = Cotrimoxazole (Trimethoprim and sulfamethoxazole)</li> <li>28 = Erythromycin</li> <li>29 = Flucloxacillin</li> <li>32 = Fusidic acid</li> <li>33 = Gentamicin</li> <li>34 = Imipenem</li> <li>35 = Itraconazole</li> <li>38 = Meropenem</li> <li>58 = Methicillin</li> <li>41 = Moxifloxacin</li> <li>45 = Ofloxacin</li> <li>46 = Penicillin/benzylpenicillin</li> <li>47 = Piperacillin tazobactam (Tazocin)</li> <li>48 = Posaconazole</li> <li>49 = Rifampicin</li> <li>52 = Ticarcillin clavulanate (Timentin)</li> <li>53 = Tigecycline</li> <li>54 = Tobramycin</li> <li>56 = Vancomycin</li> <li>57 = Voriconazole</li> <li>999 = Other</li> </ul> |
| 3.2 | Micro-organisms from Airway Samples | 1.3.3.1a | antibiotic_type_other_3     | Antibiotic type other 3     |  | string |  |                                                                                                                                                                                                                                                                                                                                                                                                                                                                                                                                                                                                                                                                                                                                                                                                                                                                                                                                                                                                                                                                                                                                               |
| 3.2 | Micro-organisms from Airway Samples | 1.3.3.2  | antibiotic_susceptibility_3 | Antibiotic susceptibility 3 |  | option |  | <ul style="list-style-type: none"> <li>2 = Susceptible</li> <li>3 = Intermediate</li> <li>4 = Resistant</li> <li>5 = Susceptible/Intermediate</li> <li>6 = Intermediate/Resistant</li> </ul>                                                                                                                                                                                                                                                                                                                                                                                                                                                                                                                                                                                                                                                                                                                                                                                                                                                                                                                                                  |
| 3.2 | Micro-organisms from Airway Samples | 1.3.4.1  | antibiotic_type_4           | Antibiotic type 4           |  | option |  | <ul style="list-style-type: none"> <li>1 = Amoxicillin</li> <li>2 = Amoxicillin clavulanate</li> <li>4 = Amikacin</li> <li>5 = Amphotericin B</li> <li>6 = Ampicillin</li> <li>7 = Azithromycin</li> <li>8 = Aztreonam</li> <li>12 = Cefepime</li> <li>13 = Cefotaxime</li> <li>14 = Ceftriaxone</li> <li>15 = Ceftazidime</li> <li>59 = Ceftazidime/avibactam</li> <li>16 = Cephalexin</li> <li>19 = Ciprofloxacin</li> <li>21 = Clindamycin</li> <li>22 = Colistin</li> <li>23 = Cotrimoxazole (Trimethoprim and sulfamethoxazole)</li> <li>28 = Erythromycin</li> <li>29 = Flucloxacillin</li> <li>32 = Fusidic acid</li> <li>33 = Gentamicin</li> <li>34 = Imipenem</li> <li>35 = Itraconazole</li> <li>38 = Meropenem</li> <li>58 = Methicillin</li> <li>41 = Moxifloxacin</li> <li>45 = Ofloxacin</li> <li>46 = Penicillin/benzylpenicillin</li> <li>47 = Piperacillin tazobactam (Tazocin)</li> <li>48 = Posaconazole</li> <li>49 = Rifampicin</li> <li>52 = Ticarcillin clavulanate (Timentin)</li> <li>53 = Tigecycline</li> <li>54 = Tobramycin</li> <li>56 = Vancomycin</li> <li>57 = Voriconazole</li> <li>999 = Other</li> </ul> |
| 3.2 | Micro-organisms from Airway Samples | 1.3.4.1a | antibiotic_type_other_4     | Antibiotic type other 4     |  | string |  |                                                                                                                                                                                                                                                                                                                                                                                                                                                                                                                                                                                                                                                                                                                                                                                                                                                                                                                                                                                                                                                                                                                                               |
| 3.2 | Micro-organisms from Airway Samples | 1.3.4.2  | antibiotic_susceptibility_4 | Antibiotic susceptibility 4 |  | option |  | <ul style="list-style-type: none"> <li>2 = Susceptible</li> <li>3 = Intermediate</li> <li>4 = Resistant</li> <li>5 = Susceptible/Intermediate</li> <li>6 = Intermediate/Resistant</li> </ul>                                                                                                                                                                                                                                                                                                                                                                                                                                                                                                                                                                                                                                                                                                                                                                                                                                                                                                                                                  |
| 3.2 | Micro-organisms from Airway Samples | 1.3.5.1  | antibiotic_type_5           | Antibiotic type 5           |  | option |  | <ul style="list-style-type: none"> <li>1 = Amoxicillin</li> <li>2 = Amoxicillin clavulanate</li> <li>4 = Amikacin</li> <li>5 = Amphotericin B</li> <li>6 = Ampicillin</li> <li>7 = Azithromycin</li> <li>8 = Aztreonam</li> <li>12 = Cefepime</li> <li>13 = Cefotaxime</li> <li>14 = Ceftriaxone</li> <li>15 = Ceftazidime</li> <li>59 = Ceftazidime/avibactam</li> <li>16 = Cephalexin</li> <li>19 = Ciprofloxacin</li> <li>21 = Clindamycin</li> <li>22 = Colistin</li> <li>23 = Cotrimoxazole (Trimethoprim and sulfamethoxazole)</li> <li>28 = Erythromycin</li> <li>29 = Flucloxacillin</li> <li>32 = Fusidic acid</li> <li>33 = Gentamicin</li> <li>34 = Imipenem</li> <li>35 = Itraconazole</li> <li>38 = Meropenem</li> <li>58 = Methicillin</li> <li>41 = Moxifloxacin</li> <li>45 = Ofloxacin</li> <li>46 = Penicillin/benzylpenicillin</li> <li>47 = Piperacillin tazobactam (Tazocin)</li> <li>48 = Posaconazole</li> <li>49 = Rifampicin</li> <li>52 = Ticarcillin clavulanate (Timentin)</li> <li>53 = Tigecycline</li> <li>54 = Tobramycin</li> <li>56 = Vancomycin</li> <li>57 = Voriconazole</li> <li>999 = Other</li> </ul> |
| 3.2 | Micro-organisms from Airway Samples | 1.3.5.1a | antibiotic_type_other_5     | Antibiotic type other 5     |  | string |  |                                                                                                                                                                                                                                                                                                                                                                                                                                                                                                                                                                                                                                                                                                                                                                                                                                                                                                                                                                                                                                                                                                                                               |
| 3.2 | Micro-organisms from Airway Samples | 1.3.5.2  | antibiotic_susceptibility_5 | Antibiotic susceptibility 5 |  | option |  | <ul style="list-style-type: none"> <li>2 = Susceptible</li> <li>3 = Intermediate</li> <li>4 = Resistant</li> <li>5 = Susceptible/Intermediate</li> <li>6 = Intermediate/Resistant</li> </ul>                                                                                                                                                                                                                                                                                                                                                                                                                                                                                                                                                                                                                                                                                                                                                                                                                                                                                                                                                  |
| 3.2 | Micro-organisms from Airway Samples | 1.3.6.1  | antibiotic_type_6           | Antibiotic type 6           |  | option |  | <ul style="list-style-type: none"> <li>1 = Amoxicillin</li> <li>2 = Amoxicillin clavulanate</li> <li>4 = Amikacin</li> <li>5 = Amphotericin B</li> <li>6 = Ampicillin</li> <li>7 = Azithromycin</li> <li>8 = Aztreonam</li> <li>12 = Cefepime</li> <li>13 = Cefotaxime</li> <li>14 = Ceftriaxone</li> <li>15 = Ceftazidime</li> <li>59 = Ceftazidime/avibactam</li> <li>16 = Cephalexin</li> <li>19 = Ciprofloxacin</li> <li>21 = Clindamycin</li> <li>22 = Colistin</li> <li>23 = Cotrimoxazole (Trimethoprim and sulfamethoxazole)</li> <li>28 = Erythromycin</li> <li>29 = Flucloxacillin</li> <li>32 = Fusidic acid</li> <li>33 = Gentamicin</li> <li>34 = Imipenem</li> <li>35 = Itraconazole</li> <li>38 = Meropenem</li> <li>58 = Methicillin</li> <li>41 = Moxifloxacin</li> <li>45 = Ofloxacin</li> <li>46 = Penicillin/benzylpenicillin</li> <li>47 = Piperacillin tazobactam (Tazocin)</li> <li>48 = Posaconazole</li> <li>49 = Rifampicin</li> <li>52 = Ticarcillin clavulanate (Timentin)</li> <li>53 = Tigecycline</li> <li>54 = Tobramycin</li> <li>56 = Vancomycin</li> <li>57 = Voriconazole</li> <li>999 = Other</li> </ul> |
| 3.2 | Micro-organisms from Airway Samples | 1.3.6.1a | antibiotic_type_other_6     | Antibiotic type other 6     |  | string |  |                                                                                                                                                                                                                                                                                                                                                                                                                                                                                                                                                                                                                                                                                                                                                                                                                                                                                                                                                                                                                                                                                                                                               |
| 3.2 | Micro-organisms from Airway Samples | 1.3.6.2  | antibiotic_susceptibility_6 | Antibiotic susceptibility 6 |  | option |  | <ul style="list-style-type: none"> <li>2 = Susceptible</li> <li>3 = Intermediate</li> <li>4 = Resistant</li> <li>5 = Susceptible/Intermediate</li> <li>6 = Intermediate/Resistant</li> </ul>                                                                                                                                                                                                                                                                                                                                                                                                                                                                                                                                                                                                                                                                                                                                                                                                                                                                                                                                                  |
| 3.2 | Micro-organisms from Airway Samples | 1.3.7.1  | antibiotic_type_7           | Antibiotic type 7           |  | option |  | <ul style="list-style-type: none"> <li>1 = Amoxicillin</li> <li>2 = Amoxicillin clavulanate</li> <li>4 = Amikacin</li> <li>5 = Amphotericin B</li> <li>6 = Ampicillin</li> <li>7 = Azithromycin</li> <li>8 = Aztreonam</li> <li>12 = Cefepime</li> <li>13 = Cefotaxime</li> <li>14 = Ceftriaxone</li> <li>15 = Ceftazidime</li> <li>59 = Ceftazidime/avibactam</li> <li>16 = Cephalexin</li> <li>19 = Ciprofloxacin</li> <li>21 = Clindamycin</li> <li>22 = Colistin</li> <li>23 = Cotrimoxazole (Trimethoprim and sulfamethoxazole)</li> <li>28 = Erythromycin</li> <li>29 = Flucloxacillin</li> <li>32 = Fusidic acid</li> <li>33 = Gentamicin</li> <li>34 = Imipenem</li> <li>35 = Itraconazole</li> <li>38 = Meropenem</li> <li>58 = Methicillin</li> <li>41 = Moxifloxacin</li> <li>45 = Ofloxacin</li> <li>46 = Penicillin/benzylpenicillin</li> <li>47 = Piperacillin tazobactam (Tazocin)</li> <li>48 = Posaconazole</li> <li>49 = Rifampicin</li> <li>52 = Ticarcillin clavulanate (Timentin)</li> <li>53 = Tigecycline</li> <li>54 = Tobramycin</li> <li>56 = Vancomycin</li> <li>57 = Voriconazole</li> <li>999 = Other</li> </ul> |
| 3.2 | Micro-organisms from Airway Samples | 1.3.7.1a | antibiotic_type_other_7     | Antibiotic type other 7     |  | string |  |                                                                                                                                                                                                                                                                                                                                                                                                                                                                                                                                                                                                                                                                                                                                                                                                                                                                                                                                                                                                                                                                                                                                               |
| 3.2 | Micro-organisms from Airway Samples | 1.3.7.2  | antibiotic_susceptibility_7 | Antibiotic susceptibility 7 |  | option |  | <ul style="list-style-type: none"> <li>2 = Susceptible</li> <li>3 = Intermediate</li> <li>4 = Resistant</li> <li>5 = Susceptible/Intermediate</li> <li>6 = Intermediate/Resistant</li> </ul>                                                                                                                                                                                                                                                                                                                                                                                                                                                                                                                                                                                                                                                                                                                                                                                                                                                                                                                                                  |

|     |                                     |           |                              |                              |  |        |  |                                                                                                                                                                                                                                                                                                                                                                                                                                                                                                                                                                                                                                                                                                                                                                                                                                                                     |
|-----|-------------------------------------|-----------|------------------------------|------------------------------|--|--------|--|---------------------------------------------------------------------------------------------------------------------------------------------------------------------------------------------------------------------------------------------------------------------------------------------------------------------------------------------------------------------------------------------------------------------------------------------------------------------------------------------------------------------------------------------------------------------------------------------------------------------------------------------------------------------------------------------------------------------------------------------------------------------------------------------------------------------------------------------------------------------|
| 3.2 | Micro-organisms from Airway Samples | 1.3.8.1   | antibiotic_type_8            | Antibiotic type 8            |  | option |  | 1 = Amoxicillin<br>2 = Amoxicillin clavulanate<br>4 = Amikacin<br>5 = Amphotericin B<br>6 = Ampicillin<br>7 = Azithromycin<br>8 = Aztreonam<br>12 = Cefepime<br>13 = Cefotaxime<br>14 = Ceftriaxone<br>15 = Ceftazidime<br>59 = Ceftazidime/avibactam<br>16 = Cephalexin<br>19 = Ciprofloxacin<br>21 = Clindamycin<br>22 = Colistin<br>23 = Cotrimoxazole (Trimethoprim and sulfamethoxazole)<br>28 = Erythromycin<br>29 = Flucloxacillin<br>32 = Fusidic acid<br>33 = Gentamicin<br>34 = Imipenem<br>35 = Itraconazole<br>38 = Meropenem<br>58 = Methicillin<br>41 = Moxifloxacin<br>45 = Ofloxacin<br>46 = Penicillin/benzylpenicillin<br>47 = Piperacillin tazobactam (Tazocin)<br>48 = Posaconazole<br>49 = Rifampicin<br>52 = Ticarcillin clavulanate (Timentin)<br>53 = Tigecycline<br>54 = Tobramycin<br>56 = Vancomycin<br>57 = Voriconazole<br>999 = Other |
| 3.2 | Micro-organisms from Airway Samples | 1.3.8.1a  | antibiotic_type_other_8      | Antibiotic type other 8      |  | string |  |                                                                                                                                                                                                                                                                                                                                                                                                                                                                                                                                                                                                                                                                                                                                                                                                                                                                     |
| 3.2 | Micro-organisms from Airway Samples | 1.3.8.2   | antibiotic_susceptibility_8  | Antibiotic susceptibility 8  |  | option |  | 2 = Susceptible<br>3 = Intermediate<br>4 = Resistant<br>5 = Susceptible/Intermediate<br>6 = Intermediate/Resistant                                                                                                                                                                                                                                                                                                                                                                                                                                                                                                                                                                                                                                                                                                                                                  |
| 3.2 | Micro-organisms from Airway Samples | 1.3.9.1   | antibiotic_type_9            | Antibiotic type 9            |  | option |  | 1 = Amoxicillin<br>2 = Amoxicillin clavulanate<br>4 = Amikacin<br>5 = Amphotericin B<br>6 = Ampicillin<br>7 = Azithromycin<br>8 = Aztreonam<br>12 = Cefepime<br>13 = Cefotaxime<br>14 = Ceftriaxone<br>15 = Ceftazidime<br>59 = Ceftazidime/avibactam<br>16 = Cephalexin<br>19 = Ciprofloxacin<br>21 = Clindamycin<br>22 = Colistin<br>23 = Cotrimoxazole (Trimethoprim and sulfamethoxazole)<br>28 = Erythromycin<br>29 = Flucloxacillin<br>32 = Fusidic acid<br>33 = Gentamicin<br>34 = Imipenem<br>35 = Itraconazole<br>38 = Meropenem<br>58 = Methicillin<br>41 = Moxifloxacin<br>45 = Ofloxacin<br>46 = Penicillin/benzylpenicillin<br>47 = Piperacillin tazobactam (Tazocin)<br>48 = Posaconazole<br>49 = Rifampicin<br>52 = Ticarcillin clavulanate (Timentin)<br>53 = Tigecycline<br>54 = Tobramycin<br>56 = Vancomycin<br>57 = Voriconazole<br>999 = Other |
| 3.2 | Micro-organisms from Airway Samples | 1.3.9.1a  | antibiotic_type_other_9      | Antibiotic type other 9      |  | string |  |                                                                                                                                                                                                                                                                                                                                                                                                                                                                                                                                                                                                                                                                                                                                                                                                                                                                     |
| 3.2 | Micro-organisms from Airway Samples | 1.3.9.2   | antibiotic_susceptibility_9  | Antibiotic susceptibility 9  |  | option |  | 2 = Susceptible<br>3 = Intermediate<br>4 = Resistant<br>5 = Susceptible/Intermediate<br>6 = Intermediate/Resistant                                                                                                                                                                                                                                                                                                                                                                                                                                                                                                                                                                                                                                                                                                                                                  |
| 3.2 | Micro-organisms from Airway Samples | 1.3.10.1  | antibiotic_type_10           | Antibiotic type 10           |  | option |  | 1 = Amoxicillin<br>2 = Amoxicillin clavulanate<br>4 = Amikacin<br>5 = Amphotericin B<br>6 = Ampicillin<br>7 = Azithromycin<br>8 = Aztreonam<br>12 = Cefepime<br>13 = Cefotaxime<br>14 = Ceftriaxone<br>15 = Ceftazidime<br>59 = Ceftazidime/avibactam<br>16 = Cephalexin<br>19 = Ciprofloxacin<br>21 = Clindamycin<br>22 = Colistin<br>23 = Cotrimoxazole (Trimethoprim and sulfamethoxazole)<br>28 = Erythromycin<br>29 = Flucloxacillin<br>32 = Fusidic acid<br>33 = Gentamicin<br>34 = Imipenem<br>35 = Itraconazole<br>38 = Meropenem<br>58 = Methicillin<br>41 = Moxifloxacin<br>45 = Ofloxacin<br>46 = Penicillin/benzylpenicillin<br>47 = Piperacillin tazobactam (Tazocin)<br>48 = Posaconazole<br>49 = Rifampicin<br>52 = Ticarcillin clavulanate (Timentin)<br>53 = Tigecycline<br>54 = Tobramycin<br>56 = Vancomycin<br>57 = Voriconazole<br>999 = Other |
| 3.2 | Micro-organisms from Airway Samples | 1.3.10.1a | antibiotic_type_other_10     | Antibiotic type other 10     |  | string |  |                                                                                                                                                                                                                                                                                                                                                                                                                                                                                                                                                                                                                                                                                                                                                                                                                                                                     |
| 3.2 | Micro-organisms from Airway Samples | 1.3.10.2  | antibiotic_susceptibility_10 | Antibiotic susceptibility 10 |  | option |  | 2 = Susceptible<br>3 = Intermediate<br>4 = Resistant<br>5 = Susceptible/Intermediate<br>6 = Intermediate/Resistant                                                                                                                                                                                                                                                                                                                                                                                                                                                                                                                                                                                                                                                                                                                                                  |
| 3.2 | Micro-organisms from Airway Samples | 1.3.11.1  | antibiotic_type_11           | Antibiotic type 11           |  | option |  | 1 = Amoxicillin<br>2 = Amoxicillin clavulanate<br>4 = Amikacin<br>5 = Amphotericin B<br>6 = Ampicillin<br>7 = Azithromycin<br>8 = Aztreonam<br>12 = Cefepime<br>13 = Cefotaxime<br>14 = Ceftriaxone<br>15 = Ceftazidime<br>59 = Ceftazidime/avibactam<br>16 = Cephalexin<br>19 = Ciprofloxacin<br>21 = Clindamycin<br>22 = Colistin<br>23 = Cotrimoxazole (Trimethoprim and sulfamethoxazole)<br>28 = Erythromycin<br>29 = Flucloxacillin<br>32 = Fusidic acid<br>33 = Gentamicin<br>34 = Imipenem<br>35 = Itraconazole<br>38 = Meropenem<br>58 = Methicillin<br>41 = Moxifloxacin<br>45 = Ofloxacin<br>46 = Penicillin/benzylpenicillin<br>47 = Piperacillin tazobactam (Tazocin)<br>48 = Posaconazole<br>49 = Rifampicin<br>52 = Ticarcillin clavulanate (Timentin)<br>53 = Tigecycline<br>54 = Tobramycin<br>56 = Vancomycin<br>57 = Voriconazole<br>999 = Other |
| 3.2 | Micro-organisms from Airway Samples | 1.3.11.1a | antibiotic_type_other_11     | Antibiotic type other 11     |  | string |  |                                                                                                                                                                                                                                                                                                                                                                                                                                                                                                                                                                                                                                                                                                                                                                                                                                                                     |
| 3.2 | Micro-organisms from Airway Samples | 1.3.11.2  | antibiotic_susceptibility_11 | Antibiotic susceptibility 11 |  | option |  | 2 = Susceptible<br>3 = Intermediate<br>4 = Resistant<br>5 = Susceptible/Intermediate<br>6 = Intermediate/Resistant                                                                                                                                                                                                                                                                                                                                                                                                                                                                                                                                                                                                                                                                                                                                                  |
| 3.2 | Micro-organisms from Airway Samples | 1.3.12.1  | antibiotic_type_12           | Antibiotic type 12           |  | option |  | 1 = Amoxicillin<br>2 = Amoxicillin clavulanate<br>4 = Amikacin<br>5 = Amphotericin B<br>6 = Ampicillin<br>7 = Azithromycin<br>8 = Aztreonam<br>12 = Cefepime<br>13 = Cefotaxime<br>14 = Ceftriaxone<br>15 = Ceftazidime<br>59 = Ceftazidime/avibactam<br>16 = Cephalexin<br>19 = Ciprofloxacin<br>21 = Clindamycin<br>22 = Colistin<br>23 = Cotrimoxazole (Trimethoprim and sulfamethoxazole)<br>28 = Erythromycin<br>29 = Flucloxacillin<br>32 = Fusidic acid<br>33 = Gentamicin<br>34 = Imipenem<br>35 = Itraconazole<br>38 = Meropenem<br>58 = Methicillin<br>41 = Moxifloxacin<br>45 = Ofloxacin<br>46 = Penicillin/benzylpenicillin<br>47 = Piperacillin tazobactam (Tazocin)<br>48 = Posaconazole<br>49 = Rifampicin<br>52 = Ticarcillin clavulanate (Timentin)<br>53 = Tigecycline<br>54 = Tobramycin<br>56 = Vancomycin<br>57 = Voriconazole<br>999 = Other |
| 3.2 | Micro-organisms from Airway Samples | 1.3.12.1a | antibiotic_type_other_12     | Antibiotic type other 12     |  | string |  |                                                                                                                                                                                                                                                                                                                                                                                                                                                                                                                                                                                                                                                                                                                                                                                                                                                                     |
| 3.2 | Micro-organisms from Airway Samples | 1.3.12.2  | antibiotic_susceptibility_12 | Antibiotic susceptibility 12 |  | option |  | 2 = Susceptible<br>3 = Intermediate<br>4 = Resistant<br>5 = Susceptible/Intermediate<br>6 = Intermediate/Resistant                                                                                                                                                                                                                                                                                                                                                                                                                                                                                                                                                                                                                                                                                                                                                  |



|     |                                     |           |                              |                              |  |        |  |                                                                                                                                                                                                                                                                                                                                                                                                                                                                                                                                                                                                                                                                                                                                                                                                                                                                     |
|-----|-------------------------------------|-----------|------------------------------|------------------------------|--|--------|--|---------------------------------------------------------------------------------------------------------------------------------------------------------------------------------------------------------------------------------------------------------------------------------------------------------------------------------------------------------------------------------------------------------------------------------------------------------------------------------------------------------------------------------------------------------------------------------------------------------------------------------------------------------------------------------------------------------------------------------------------------------------------------------------------------------------------------------------------------------------------|
| 3.2 | Micro-organisms from Airway Samples | 1.3.13.1  | antibiotic_type_13           | Antibiotic type 13           |  | option |  | 1 = Amoxicillin<br>2 = Amoxicillin clavulanate<br>4 = Amikacin<br>5 = Amphotericin B<br>6 = Ampicillin<br>7 = Azithromycin<br>8 = Aztreonam<br>12 = Cefepime<br>13 = Cefotaxime<br>14 = Ceftriaxone<br>15 = Ceftazidime<br>59 = Ceftazidime/avibactam<br>16 = Cephalexin<br>19 = Ciprofloxacin<br>21 = Clindamycin<br>22 = Colistin<br>23 = Cotrimoxazole (Trimethoprim and sulfamethoxazole)<br>28 = Erythromycin<br>29 = Flucloxacillin<br>32 = Fusidic acid<br>33 = Gentamicin<br>34 = Imipenem<br>35 = Itraconazole<br>38 = Meropenem<br>58 = Methicillin<br>41 = Moxifloxacin<br>45 = Ofloxacin<br>46 = Penicillin/benzylpenicillin<br>47 = Piperacillin tazobactam (Tazocin)<br>48 = Posaconazole<br>49 = Rifampicin<br>52 = Ticarcillin clavulanate (Timentin)<br>53 = Tigecycline<br>54 = Tobramycin<br>56 = Vancomycin<br>57 = Voriconazole<br>999 = Other |
| 3.2 | Micro-organisms from Airway Samples | 1.3.13.1a | antibiotic_type_other_13     | Antibiotic type other 13     |  | string |  |                                                                                                                                                                                                                                                                                                                                                                                                                                                                                                                                                                                                                                                                                                                                                                                                                                                                     |
| 3.2 | Micro-organisms from Airway Samples | 1.3.13.2  | antibiotic_susceptibility_13 | Antibiotic susceptibility 13 |  | option |  | 2 = Susceptible<br>3 = Intermediate<br>4 = Resistant<br>5 = Susceptible/Intermediate<br>6 = Intermediate/Resistant                                                                                                                                                                                                                                                                                                                                                                                                                                                                                                                                                                                                                                                                                                                                                  |
| 3.2 | Micro-organisms from Airway Samples | 1.3.14.1  | antibiotic_type_14           | Antibiotic type 14           |  | option |  | 1 = Amoxicillin<br>2 = Amoxicillin clavulanate<br>4 = Amikacin<br>5 = Amphotericin B<br>6 = Ampicillin<br>7 = Azithromycin<br>8 = Aztreonam<br>12 = Cefepime<br>13 = Cefotaxime<br>14 = Ceftriaxone<br>15 = Ceftazidime<br>59 = Ceftazidime/avibactam<br>16 = Cephalexin<br>19 = Ciprofloxacin<br>21 = Clindamycin<br>22 = Colistin<br>23 = Cotrimoxazole (Trimethoprim and sulfamethoxazole)<br>28 = Erythromycin<br>29 = Flucloxacillin<br>32 = Fusidic acid<br>33 = Gentamicin<br>34 = Imipenem<br>35 = Itraconazole<br>38 = Meropenem<br>58 = Methicillin<br>41 = Moxifloxacin<br>45 = Ofloxacin<br>46 = Penicillin/benzylpenicillin<br>47 = Piperacillin tazobactam (Tazocin)<br>48 = Posaconazole<br>49 = Rifampicin<br>52 = Ticarcillin clavulanate (Timentin)<br>53 = Tigecycline<br>54 = Tobramycin<br>56 = Vancomycin<br>57 = Voriconazole<br>999 = Other |
| 3.2 | Micro-organisms from Airway Samples | 1.3.14.1a | antibiotic_type_other_14     | Antibiotic type other 14     |  | string |  |                                                                                                                                                                                                                                                                                                                                                                                                                                                                                                                                                                                                                                                                                                                                                                                                                                                                     |
| 3.2 | Micro-organisms from Airway Samples | 1.3.14.2  | antibiotic_susceptibility_14 | Antibiotic susceptibility 14 |  | option |  | 2 = Susceptible<br>3 = Intermediate<br>4 = Resistant<br>5 = Susceptible/Intermediate<br>6 = Intermediate/Resistant                                                                                                                                                                                                                                                                                                                                                                                                                                                                                                                                                                                                                                                                                                                                                  |
| 3.2 | Micro-organisms from Airway Samples | 1.3.15.1  | antibiotic_type_15           | Antibiotic type 15           |  | option |  | 1 = Amoxicillin<br>2 = Amoxicillin clavulanate<br>4 = Amikacin<br>5 = Amphotericin B<br>6 = Ampicillin<br>7 = Azithromycin<br>8 = Aztreonam<br>12 = Cefepime<br>13 = Cefotaxime<br>14 = Ceftriaxone<br>15 = Ceftazidime<br>59 = Ceftazidime/avibactam<br>16 = Cephalexin<br>19 = Ciprofloxacin<br>21 = Clindamycin<br>22 = Colistin<br>23 = Cotrimoxazole (Trimethoprim and sulfamethoxazole)<br>28 = Erythromycin<br>29 = Flucloxacillin<br>32 = Fusidic acid<br>33 = Gentamicin<br>34 = Imipenem<br>35 = Itraconazole<br>38 = Meropenem<br>58 = Methicillin<br>41 = Moxifloxacin<br>45 = Ofloxacin<br>46 = Penicillin/benzylpenicillin<br>47 = Piperacillin tazobactam (Tazocin)<br>48 = Posaconazole<br>49 = Rifampicin<br>52 = Ticarcillin clavulanate (Timentin)<br>53 = Tigecycline<br>54 = Tobramycin<br>56 = Vancomycin<br>57 = Voriconazole<br>999 = Other |
| 3.2 | Micro-organisms from Airway Samples | 1.3.15.1a | antibiotic_type_other_15     | Antibiotic type other 15     |  | string |  |                                                                                                                                                                                                                                                                                                                                                                                                                                                                                                                                                                                                                                                                                                                                                                                                                                                                     |
| 3.2 | Micro-organisms from Airway Samples | 1.3.15.2  | antibiotic_susceptibility_15 | Antibiotic susceptibility 15 |  | option |  | 2 = Susceptible<br>3 = Intermediate<br>4 = Resistant<br>5 = Susceptible/Intermediate<br>6 = Intermediate/Resistant                                                                                                                                                                                                                                                                                                                                                                                                                                                                                                                                                                                                                                                                                                                                                  |
| 3.2 | Micro-organisms from Airway Samples | 1.3.16.1  | antibiotic_type_16           | Antibiotic type 16           |  | option |  | 1 = Amoxicillin<br>2 = Amoxicillin clavulanate<br>4 = Amikacin<br>5 = Amphotericin B<br>6 = Ampicillin<br>7 = Azithromycin<br>8 = Aztreonam<br>12 = Cefepime<br>13 = Cefotaxime<br>14 = Ceftriaxone<br>15 = Ceftazidime<br>59 = Ceftazidime/avibactam<br>16 = Cephalexin<br>19 = Ciprofloxacin<br>21 = Clindamycin<br>22 = Colistin<br>23 = Cotrimoxazole (Trimethoprim and sulfamethoxazole)<br>28 = Erythromycin<br>29 = Flucloxacillin<br>32 = Fusidic acid<br>33 = Gentamicin<br>34 = Imipenem<br>35 = Itraconazole<br>38 = Meropenem<br>58 = Methicillin<br>41 = Moxifloxacin<br>45 = Ofloxacin<br>46 = Penicillin/benzylpenicillin<br>47 = Piperacillin tazobactam (Tazocin)<br>48 = Posaconazole<br>49 = Rifampicin<br>52 = Ticarcillin clavulanate (Timentin)<br>53 = Tigecycline<br>54 = Tobramycin<br>56 = Vancomycin<br>57 = Voriconazole<br>999 = Other |
| 3.2 | Micro-organisms from Airway Samples | 1.3.16.1a | antibiotic_type_other_16     | Antibiotic type other 16     |  | string |  |                                                                                                                                                                                                                                                                                                                                                                                                                                                                                                                                                                                                                                                                                                                                                                                                                                                                     |
| 3.2 | Micro-organisms from Airway Samples | 1.3.16.2  | antibiotic_susceptibility_16 | Antibiotic susceptibility 16 |  | option |  | 2 = Susceptible<br>3 = Intermediate<br>4 = Resistant<br>5 = Susceptible/Intermediate<br>6 = Intermediate/Resistant                                                                                                                                                                                                                                                                                                                                                                                                                                                                                                                                                                                                                                                                                                                                                  |
| 3.2 | Micro-organisms from Airway Samples | 1.3.17.1  | antibiotic_type_17           | Antibiotic type 17           |  | option |  | 1 = Amoxicillin<br>2 = Amoxicillin clavulanate<br>4 = Amikacin<br>5 = Amphotericin B<br>6 = Ampicillin<br>7 = Azithromycin<br>8 = Aztreonam<br>12 = Cefepime<br>13 = Cefotaxime<br>14 = Ceftriaxone<br>15 = Ceftazidime<br>59 = Ceftazidime/avibactam<br>16 = Cephalexin<br>19 = Ciprofloxacin<br>21 = Clindamycin<br>22 = Colistin<br>23 = Cotrimoxazole (Trimethoprim and sulfamethoxazole)<br>28 = Erythromycin<br>29 = Flucloxacillin<br>32 = Fusidic acid<br>33 = Gentamicin<br>34 = Imipenem<br>35 = Itraconazole<br>38 = Meropenem<br>58 = Methicillin<br>41 = Moxifloxacin<br>45 = Ofloxacin<br>46 = Penicillin/benzylpenicillin<br>47 = Piperacillin tazobactam (Tazocin)<br>48 = Posaconazole<br>49 = Rifampicin<br>52 = Ticarcillin clavulanate (Timentin)<br>53 = Tigecycline<br>54 = Tobramycin<br>56 = Vancomycin<br>57 = Voriconazole<br>999 = Other |
| 3.2 | Micro-organisms from Airway Samples | 1.3.17.1a | antibiotic_type_other_17     | Antibiotic type other 17     |  | string |  |                                                                                                                                                                                                                                                                                                                                                                                                                                                                                                                                                                                                                                                                                                                                                                                                                                                                     |
| 3.2 | Micro-organisms from Airway Samples | 1.3.17.2  | antibiotic_susceptibility_17 | Antibiotic susceptibility 17 |  | option |  | 2 = Susceptible<br>3 = Intermediate<br>4 = Resistant<br>5 = Susceptible/Intermediate<br>6 = Intermediate/Resistant                                                                                                                                                                                                                                                                                                                                                                                                                                                                                                                                                                                                                                                                                                                                                  |

|     |                                        |           |                              |                                                                                     |  |          |                                                                                                                                                                                                                                                                                                                                                                                                                                                                                                                                                                                                                                                                                                                                                                                                                                                                                                                                                                                                                                                                                                                                                                                                                                                          |
|-----|----------------------------------------|-----------|------------------------------|-------------------------------------------------------------------------------------|--|----------|----------------------------------------------------------------------------------------------------------------------------------------------------------------------------------------------------------------------------------------------------------------------------------------------------------------------------------------------------------------------------------------------------------------------------------------------------------------------------------------------------------------------------------------------------------------------------------------------------------------------------------------------------------------------------------------------------------------------------------------------------------------------------------------------------------------------------------------------------------------------------------------------------------------------------------------------------------------------------------------------------------------------------------------------------------------------------------------------------------------------------------------------------------------------------------------------------------------------------------------------------------|
| 3.2 | Micro-organisms from Airway Samples    | 1.3.18.1  | antibiotic_type_18           | Antibiotic type 18                                                                  |  | option   | 1 = Amoxicillin<br>2 = Amoxicillin clavulanate<br>4 = Amikacin<br>5 = Amphotericin B<br>6 = Ampicillin<br>7 = Azithromycin<br>8 = Aztreonam<br>12 = Cefepime<br>13 = Cefotaxime<br>14 = Ceftriaxone<br>15 = Ceftazidime<br>59 = Ceftazidime/avibactam<br>16 = Cephalexin<br>19 = Ciprofloxacin<br>21 = Clindamycin<br>22 = Colistin<br>23 = Cotrimoxazole (Trimethoprim and sulfamethoxazole)<br>28 = Erythromycin<br>29 = Flucloxacillin<br>32 = Fusidic acid<br>33 = Gentamicin<br>34 = Imipenem<br>35 = Itraconazole<br>38 = Meropenem<br>58 = Methicillin<br>41 = Moxifloxacin<br>45 = Ofloxacin<br>46 = Penicillin/benzylpenicillin<br>47 = Piperacillin tazobactam (Tazocin)<br>48 = Posaconazole<br>49 = Rifampicin<br>52 = Ticarcillin clavulanate (Timentin)<br>53 = Tigecycline<br>54 = Tobramycin<br>56 = Vancomycin<br>57 = Voriconazole<br>999 = Other                                                                                                                                                                                                                                                                                                                                                                                      |
| 3.2 | Micro-organisms from Airway Samples    | 1.3.18.1a | antibiotic_type_other_18     | Antibiotic type other 18                                                            |  | string   |                                                                                                                                                                                                                                                                                                                                                                                                                                                                                                                                                                                                                                                                                                                                                                                                                                                                                                                                                                                                                                                                                                                                                                                                                                                          |
| 3.2 | Micro-organisms from Airway Samples    | 1.3.18.2  | antibiotic_susceptibility_18 | Antibiotic susceptibility 18                                                        |  | option   | 2 = Susceptible<br>3 = Intermediate<br>4 = Resistant<br>5 = Susceptible/Intermediate<br>6 = Intermediate/Resistant                                                                                                                                                                                                                                                                                                                                                                                                                                                                                                                                                                                                                                                                                                                                                                                                                                                                                                                                                                                                                                                                                                                                       |
| 3.2 | Micro-organisms from Airway Samples    | 1.3.19.1  | antibiotic_type_19           | Antibiotic type 19                                                                  |  | option   | 1 = Amoxicillin<br>2 = Amoxicillin clavulanate<br>4 = Amikacin<br>5 = Amphotericin B<br>6 = Ampicillin<br>7 = Azithromycin<br>8 = Aztreonam<br>12 = Cefepime<br>13 = Cefotaxime<br>14 = Ceftriaxone<br>15 = Ceftazidime<br>59 = Ceftazidime/avibactam<br>16 = Cephalexin<br>19 = Ciprofloxacin<br>21 = Clindamycin<br>22 = Colistin<br>23 = Cotrimoxazole (Trimethoprim and sulfamethoxazole)<br>28 = Erythromycin<br>29 = Flucloxacillin<br>32 = Fusidic acid<br>33 = Gentamicin<br>34 = Imipenem<br>35 = Itraconazole<br>38 = Meropenem<br>58 = Methicillin<br>41 = Moxifloxacin<br>45 = Ofloxacin<br>46 = Penicillin/benzylpenicillin<br>47 = Piperacillin tazobactam (Tazocin)<br>48 = Posaconazole<br>49 = Rifampicin<br>52 = Ticarcillin clavulanate (Timentin)<br>53 = Tigecycline<br>54 = Tobramycin<br>56 = Vancomycin<br>57 = Voriconazole<br>999 = Other                                                                                                                                                                                                                                                                                                                                                                                      |
| 3.2 | Micro-organisms from Airway Samples    | 1.3.19.1a | antibiotic_type_other_19     | Antibiotic type other 19                                                            |  | string   |                                                                                                                                                                                                                                                                                                                                                                                                                                                                                                                                                                                                                                                                                                                                                                                                                                                                                                                                                                                                                                                                                                                                                                                                                                                          |
| 3.2 | Micro-organisms from Airway Samples    | 1.3.19.2  | antibiotic_susceptibility_19 | Antibiotic susceptibility 19                                                        |  | option   | 2 = Susceptible<br>3 = Intermediate<br>4 = Resistant<br>5 = Susceptible/Intermediate<br>6 = Intermediate/Resistant                                                                                                                                                                                                                                                                                                                                                                                                                                                                                                                                                                                                                                                                                                                                                                                                                                                                                                                                                                                                                                                                                                                                       |
| 3.2 | Micro-organisms from Airway Samples    | 1.3.20.1  | antibiotic_type_20           | Antibiotic type 20                                                                  |  | option   | 1 = Amoxicillin<br>2 = Amoxicillin clavulanate<br>4 = Amikacin<br>5 = Amphotericin B<br>6 = Ampicillin<br>7 = Azithromycin<br>8 = Aztreonam<br>12 = Cefepime<br>13 = Cefotaxime<br>14 = Ceftriaxone<br>15 = Ceftazidime<br>59 = Ceftazidime/avibactam<br>16 = Cephalexin<br>19 = Ciprofloxacin<br>21 = Clindamycin<br>22 = Colistin<br>23 = Cotrimoxazole (Trimethoprim and sulfamethoxazole)<br>28 = Erythromycin<br>29 = Flucloxacillin<br>32 = Fusidic acid<br>33 = Gentamicin<br>34 = Imipenem<br>35 = Itraconazole<br>38 = Meropenem<br>58 = Methicillin<br>41 = Moxifloxacin<br>45 = Ofloxacin<br>46 = Penicillin/benzylpenicillin<br>47 = Piperacillin tazobactam (Tazocin)<br>48 = Posaconazole<br>49 = Rifampicin<br>52 = Ticarcillin clavulanate (Timentin)<br>53 = Tigecycline<br>54 = Tobramycin<br>56 = Vancomycin<br>57 = Voriconazole<br>999 = Other                                                                                                                                                                                                                                                                                                                                                                                      |
| 3.2 | Micro-organisms from Airway Samples    | 1.3.20.1a | antibiotic_type_other_20     | Antibiotic type other 20                                                            |  | string   |                                                                                                                                                                                                                                                                                                                                                                                                                                                                                                                                                                                                                                                                                                                                                                                                                                                                                                                                                                                                                                                                                                                                                                                                                                                          |
| 3.2 | Micro-organisms from Airway Samples    | 1.3.20.2  | antibiotic_susceptibility_20 | Antibiotic susceptibility 20                                                        |  | option   | 2 = Susceptible<br>3 = Intermediate<br>4 = Resistant<br>5 = Susceptible/Intermediate<br>6 = Intermediate/Resistant                                                                                                                                                                                                                                                                                                                                                                                                                                                                                                                                                                                                                                                                                                                                                                                                                                                                                                                                                                                                                                                                                                                                       |
| 4   | Contraindications to Study Antibiotics | 1.1       | contraabx                    | Name of potentially contraindicated study antibiotic                                |  | option   | 2 = Amoxicillin clavulanate<br>4 = Amikacin<br>5 = Amphotericin B<br>6 = Ampicillin<br>7 = Azithromycin<br>8 = Aztreonam<br>9 = Caspofungin<br>10 = Caspofungin<br>11 = Cefazolin<br>12 = Cefepime<br>13 = Cefotaxime<br>14 = Ceftriaxone<br>15 = Ceftazidime<br>59 = Ceftazidime/avibactam<br>16 = Cephalexin<br>17 = Cephalosporin<br>18 = Chloramphenicol<br>19 = Ciprofloxacin<br>20 = Clarithromycin<br>21 = Clindamycin<br>22 = Colistin<br>23 = Cotrimoxazole (Trimethoprim and sulfamethoxazole)<br>24 = Daptomycin<br>25 = Dicoxacillin<br>26 = Doxycycline<br>27 = Ertapenem<br>28 = Erythromycin<br>29 = Flucloxacillin<br>30 = Fluconazole<br>31 = Fosfomycin<br>32 = Fusidic acid<br>33 = Gentamicin<br>34 = Imipenem<br>35 = Itraconazole<br>36 = Ketoconazole<br>37 = Linezolid<br>38 = Meropenem<br>39 = Metronidazole<br>41 = Moxifloxacin<br>42 = Mupirocin<br>43 = Nitrofurantoin<br>44 = Norfloxacin<br>45 = Ofloxacin<br>46 = Penicillin/benzylpenicillin<br>47 = Piperacillin tazobactam (Tazocin)<br>48 = Posaconazole<br>49 = Rifampicin<br>50 = Teicoplanin<br>51 = Tetracycline<br>52 = Ticarcillin clavulanate (Timentin)<br>53 = Tigecycline<br>54 = Tobramycin<br>55 = Trimethoprim<br>56 = Vancomycin<br>57 = Voriconazole |
| 4   | Contraindications to Study Antibiotics | 1.1.1a    | contrarouteiv                | Intravenous                                                                         |  | checkbox | 0 = Yes<br>1 = No                                                                                                                                                                                                                                                                                                                                                                                                                                                                                                                                                                                                                                                                                                                                                                                                                                                                                                                                                                                                                                                                                                                                                                                                                                        |
| 4   | Contraindications to Study Antibiotics | 1.1.1b    | contrarouteinh               | Inhaled                                                                             |  | checkbox | 0 = Yes<br>1 = No                                                                                                                                                                                                                                                                                                                                                                                                                                                                                                                                                                                                                                                                                                                                                                                                                                                                                                                                                                                                                                                                                                                                                                                                                                        |
| 4   | Contraindications to Study Antibiotics | 1.2       | contrarsn                    | What is the reason for the contraindication to the antibiotic named in 1.1?         |  | option   | 1 = Previous immune-mediated reaction<br>2 = Susceptibility to toxicity                                                                                                                                                                                                                                                                                                                                                                                                                                                                                                                                                                                                                                                                                                                                                                                                                                                                                                                                                                                                                                                                                                                                                                                  |
| 4   | Contraindications to Study Antibiotics | 1.2.1     | contracause                  | Is the antibiotic named in 1.1 the specific antibiotic that the patient reacted to? |  | boolean  | 1 = Yes<br>0 = No                                                                                                                                                                                                                                                                                                                                                                                                                                                                                                                                                                                                                                                                                                                                                                                                                                                                                                                                                                                                                                                                                                                                                                                                                                        |

|     |                                        |          |                      |                                                                                                                               |  |             |                                                                                                                                                                                                                                                                                                                                                                                                                                                                                                                                                                                                                                                                                                                                                                                                                                                                                                                                                                                                                                                                                                                                                                                                                                                |                                                                                                                                                                                                                                                                                                                                                                                                                                                                                                                                                                                                                                                                                                                                                                                                                                                                                                                                                                                                                                                                                                                                                                                                                                                                                                             |
|-----|----------------------------------------|----------|----------------------|-------------------------------------------------------------------------------------------------------------------------------|--|-------------|------------------------------------------------------------------------------------------------------------------------------------------------------------------------------------------------------------------------------------------------------------------------------------------------------------------------------------------------------------------------------------------------------------------------------------------------------------------------------------------------------------------------------------------------------------------------------------------------------------------------------------------------------------------------------------------------------------------------------------------------------------------------------------------------------------------------------------------------------------------------------------------------------------------------------------------------------------------------------------------------------------------------------------------------------------------------------------------------------------------------------------------------------------------------------------------------------------------------------------------------|-------------------------------------------------------------------------------------------------------------------------------------------------------------------------------------------------------------------------------------------------------------------------------------------------------------------------------------------------------------------------------------------------------------------------------------------------------------------------------------------------------------------------------------------------------------------------------------------------------------------------------------------------------------------------------------------------------------------------------------------------------------------------------------------------------------------------------------------------------------------------------------------------------------------------------------------------------------------------------------------------------------------------------------------------------------------------------------------------------------------------------------------------------------------------------------------------------------------------------------------------------------------------------------------------------------|
| 4   | Contraindications to Study Antibiotics | 1.2.1.1  | contraparent         | Which antibiotic did the patient react to that resulted in this contraindication?                                             |  | option      |                                                                                                                                                                                                                                                                                                                                                                                                                                                                                                                                                                                                                                                                                                                                                                                                                                                                                                                                                                                                                                                                                                                                                                                                                                                | 1 = Amoxicillin<br>2 = Amoxicillin clavulanate<br>4 = Amikacin<br>5 = Amphotericin B<br>6 = Ampicillin<br>7 = Azithromycin<br>8 = Aztreonam<br>9 = Caspofungin<br>10 = Cefaclor<br>11 = Cefazolin<br>12 = Cefepime<br>13 = Ceftriaxone<br>14 = Ceftazidime<br>15 = Ceftazidime<br>59 = Ceftazidime/avibactam<br>16 = Cephalexin<br>17 = Cephalothin<br>18 = Chloramphenicol<br>19 = Ciprofloxacin<br>20 = Clarithromycin<br>21 = Clindamycin<br>22 = Colistin<br>23 = Cotrimoxazole (Trimethoprim and sulfamethoxazole)<br>24 = Daptomycin<br>25 = Diclouacillin<br>26 = Doxycycline<br>27 = Ertapenem<br>28 = Erythromycin<br>29 = Fluocloxacillin<br>30 = Fluconazole<br>31 = Fosfomycin<br>32 = Fusidic acid<br>33 = Gentamicin<br>34 = Impenem<br>35 = Itraconazole<br>36 = Ketoconazole<br>37 = Linezolid<br>38 = Meropenem<br>39 = Metronidazole<br>40 = Mirocycine<br>41 = Moxifloxacin<br>42 = Mupirocin<br>43 = Nitrofurantoin<br>44 = Norfloxacin<br>45 = Ofloxacin<br>46 = Penicillin/benzylpenicillin<br>47 = Piperacillin tazobactam (Tazocin)<br>48 = Posaconazole<br>49 = Ritampirin<br>50 = Telicoplanin<br>51 = Tetracycline<br>52 = Ticarcillin clavulanate (Timentin)<br>53 = Tigecycline<br>54 = Tobramycin<br>55 = Trimethoprim<br>56 = Vancomycin<br>57 = Voriconazole<br>999 = Other |
| 4   | Contraindications to Study Antibiotics | 1.2.1.1a | contraparentoth      | Specify                                                                                                                       |  | string      |                                                                                                                                                                                                                                                                                                                                                                                                                                                                                                                                                                                                                                                                                                                                                                                                                                                                                                                                                                                                                                                                                                                                                                                                                                                |                                                                                                                                                                                                                                                                                                                                                                                                                                                                                                                                                                                                                                                                                                                                                                                                                                                                                                                                                                                                                                                                                                                                                                                                                                                                                                             |
| 4   | Contraindications to Study Antibiotics | 1.3a     | contrasrcpat         | Patient/parent                                                                                                                |  | checkbox    | 0 = No<br>1 = Yes                                                                                                                                                                                                                                                                                                                                                                                                                                                                                                                                                                                                                                                                                                                                                                                                                                                                                                                                                                                                                                                                                                                                                                                                                              |                                                                                                                                                                                                                                                                                                                                                                                                                                                                                                                                                                                                                                                                                                                                                                                                                                                                                                                                                                                                                                                                                                                                                                                                                                                                                                             |
| 4   | Contraindications to Study Antibiotics | 1.3b     | contrasrcalt         | Hospital alert                                                                                                                |  | checkbox    | 0 = No<br>1 = Yes                                                                                                                                                                                                                                                                                                                                                                                                                                                                                                                                                                                                                                                                                                                                                                                                                                                                                                                                                                                                                                                                                                                                                                                                                              |                                                                                                                                                                                                                                                                                                                                                                                                                                                                                                                                                                                                                                                                                                                                                                                                                                                                                                                                                                                                                                                                                                                                                                                                                                                                                                             |
| 4   | Contraindications to Study Antibiotics | 1.3c     | contrasrcclin        | Clinician                                                                                                                     |  | checkbox    | 0 = No<br>1 = Yes                                                                                                                                                                                                                                                                                                                                                                                                                                                                                                                                                                                                                                                                                                                                                                                                                                                                                                                                                                                                                                                                                                                                                                                                                              |                                                                                                                                                                                                                                                                                                                                                                                                                                                                                                                                                                                                                                                                                                                                                                                                                                                                                                                                                                                                                                                                                                                                                                                                                                                                                                             |
| 4   | Contraindications to Study Antibiotics | 1.3d     | contrasrcbrc         | Medical alert bracelet                                                                                                        |  | checkbox    | 0 = No<br>1 = Yes                                                                                                                                                                                                                                                                                                                                                                                                                                                                                                                                                                                                                                                                                                                                                                                                                                                                                                                                                                                                                                                                                                                                                                                                                              |                                                                                                                                                                                                                                                                                                                                                                                                                                                                                                                                                                                                                                                                                                                                                                                                                                                                                                                                                                                                                                                                                                                                                                                                                                                                                                             |
| 4   | Contraindications to Study Antibiotics | 1.3e     | contrasrcrev         | Medical record review                                                                                                         |  | checkbox    | 0 = No<br>1 = Yes                                                                                                                                                                                                                                                                                                                                                                                                                                                                                                                                                                                                                                                                                                                                                                                                                                                                                                                                                                                                                                                                                                                                                                                                                              |                                                                                                                                                                                                                                                                                                                                                                                                                                                                                                                                                                                                                                                                                                                                                                                                                                                                                                                                                                                                                                                                                                                                                                                                                                                                                                             |
| 4   | Contraindications to Study Antibiotics | 1.3f     | contrasrcsth         | Other                                                                                                                         |  | checkbox    | 0 = No<br>1 = Yes                                                                                                                                                                                                                                                                                                                                                                                                                                                                                                                                                                                                                                                                                                                                                                                                                                                                                                                                                                                                                                                                                                                                                                                                                              |                                                                                                                                                                                                                                                                                                                                                                                                                                                                                                                                                                                                                                                                                                                                                                                                                                                                                                                                                                                                                                                                                                                                                                                                                                                                                                             |
| 4   | Contraindications to Study Antibiotics | 1.3.1    | contrasrcsthdesc     | Other source                                                                                                                  |  | string      |                                                                                                                                                                                                                                                                                                                                                                                                                                                                                                                                                                                                                                                                                                                                                                                                                                                                                                                                                                                                                                                                                                                                                                                                                                                |                                                                                                                                                                                                                                                                                                                                                                                                                                                                                                                                                                                                                                                                                                                                                                                                                                                                                                                                                                                                                                                                                                                                                                                                                                                                                                             |
| 4   | Contraindications to Study Antibiotics | 2.1      | reactknown           | Are details of this reaction known?                                                                                           |  | boolean     | 0 = No<br>1 = Yes                                                                                                                                                                                                                                                                                                                                                                                                                                                                                                                                                                                                                                                                                                                                                                                                                                                                                                                                                                                                                                                                                                                                                                                                                              |                                                                                                                                                                                                                                                                                                                                                                                                                                                                                                                                                                                                                                                                                                                                                                                                                                                                                                                                                                                                                                                                                                                                                                                                                                                                                                             |
| 4   | Contraindications to Study Antibiotics | 2.1.1    | reactype             | Type of reaction                                                                                                              |  | option      | 1 = Anaphylaxis<br>2 = Hepatitis<br>3 = Acute interstitial nephritis<br>4 = Serum sickness<br>5 = Drug Reaction with Eosinophilia and Systemic S<br>6 = Stevens-Johnson-Syndrome<br>7 = Toxic Epidermal Necrolysis<br>8 = Acute Generalised Exanthematous Pustulosis<br>9 = Other serious reaction<br>10 = Less serious reaction                                                                                                                                                                                                                                                                                                                                                                                                                                                                                                                                                                                                                                                                                                                                                                                                                                                                                                               |                                                                                                                                                                                                                                                                                                                                                                                                                                                                                                                                                                                                                                                                                                                                                                                                                                                                                                                                                                                                                                                                                                                                                                                                                                                                                                             |
| 4   | Contraindications to Study Antibiotics | 2.1.1a   | reactypeoth          | Specify                                                                                                                       |  | string      |                                                                                                                                                                                                                                                                                                                                                                                                                                                                                                                                                                                                                                                                                                                                                                                                                                                                                                                                                                                                                                                                                                                                                                                                                                                |                                                                                                                                                                                                                                                                                                                                                                                                                                                                                                                                                                                                                                                                                                                                                                                                                                                                                                                                                                                                                                                                                                                                                                                                                                                                                                             |
| 4   | Contraindications to Study Antibiotics | 2.1.1.1  | reactsimm            | Immediacy of reaction                                                                                                         |  | option      | 1 = Immediate (< 6hr after dose)<br>2 = Non-immediate<br>3 = Unknown                                                                                                                                                                                                                                                                                                                                                                                                                                                                                                                                                                                                                                                                                                                                                                                                                                                                                                                                                                                                                                                                                                                                                                           |                                                                                                                                                                                                                                                                                                                                                                                                                                                                                                                                                                                                                                                                                                                                                                                                                                                                                                                                                                                                                                                                                                                                                                                                                                                                                                             |
| 4   | Contraindications to Study Antibiotics | 2.1.1.2  | reactallergic        | Reaction considered to be                                                                                                     |  | option      | 1 = Likely allergic<br>2 = Unlikely allergic and not a contraindication for fut                                                                                                                                                                                                                                                                                                                                                                                                                                                                                                                                                                                                                                                                                                                                                                                                                                                                                                                                                                                                                                                                                                                                                                |                                                                                                                                                                                                                                                                                                                                                                                                                                                                                                                                                                                                                                                                                                                                                                                                                                                                                                                                                                                                                                                                                                                                                                                                                                                                                                             |
| 4   | Contraindications to Study Antibiotics | 2.1.2    | reactdate            | Reaction start date                                                                                                           |  | date        |                                                                                                                                                                                                                                                                                                                                                                                                                                                                                                                                                                                                                                                                                                                                                                                                                                                                                                                                                                                                                                                                                                                                                                                                                                                |                                                                                                                                                                                                                                                                                                                                                                                                                                                                                                                                                                                                                                                                                                                                                                                                                                                                                                                                                                                                                                                                                                                                                                                                                                                                                                             |
| 4   | Contraindications to Study Antibiotics | 2.1.3    | reactassess          | Has the reaction assessed by an immunologist?                                                                                 |  | boolean     | 0 = No<br>1 = Yes                                                                                                                                                                                                                                                                                                                                                                                                                                                                                                                                                                                                                                                                                                                                                                                                                                                                                                                                                                                                                                                                                                                                                                                                                              |                                                                                                                                                                                                                                                                                                                                                                                                                                                                                                                                                                                                                                                                                                                                                                                                                                                                                                                                                                                                                                                                                                                                                                                                                                                                                                             |
| 4   | Contraindications to Study Antibiotics | 2.1.3.1  | reactassessdat       | Date of assessment                                                                                                            |  | date        |                                                                                                                                                                                                                                                                                                                                                                                                                                                                                                                                                                                                                                                                                                                                                                                                                                                                                                                                                                                                                                                                                                                                                                                                                                                |                                                                                                                                                                                                                                                                                                                                                                                                                                                                                                                                                                                                                                                                                                                                                                                                                                                                                                                                                                                                                                                                                                                                                                                                                                                                                                             |
| 4   | Contraindications to Study Antibiotics | 2.1.3.2  | contrasafe           | With regards to safety of % [contraabx], what did the immunologist determine?                                                 |  | option      | 0 = Not contraindicated<br>1 = Contraindicated<br>-1 = Not determined                                                                                                                                                                                                                                                                                                                                                                                                                                                                                                                                                                                                                                                                                                                                                                                                                                                                                                                                                                                                                                                                                                                                                                          |                                                                                                                                                                                                                                                                                                                                                                                                                                                                                                                                                                                                                                                                                                                                                                                                                                                                                                                                                                                                                                                                                                                                                                                                                                                                                                             |
| 4   | Contraindications to Study Antibiotics | 3.1      | contraactive         | Does the responsible clinician consider this antibiotic to be currently contraindicated for this participant?                 |  | option      | -1 = To be confirmed<br>0 = Not contraindicated<br>1 = Contraindicated                                                                                                                                                                                                                                                                                                                                                                                                                                                                                                                                                                                                                                                                                                                                                                                                                                                                                                                                                                                                                                                                                                                                                                         |                                                                                                                                                                                                                                                                                                                                                                                                                                                                                                                                                                                                                                                                                                                                                                                                                                                                                                                                                                                                                                                                                                                                                                                                                                                                                                             |
| 5   | Concomitant Medications                | 1.1      | cmtrt                | Name of medicine                                                                                                              |  | option      | 2 = Amoxicillin clavulanate<br>7 = Azithromycin<br>16 = Cephalexin<br>19 = Ciprofloxacin<br>21 = Clindamycin<br>23 = Cotrimoxazole (Trimethoprim and sulfamethoxazole)<br>29 = Fluocloxacillin<br>35 = Itraconazole<br>40 = Mirocycine<br>54 = Tobramycin<br>57 = Voriconazole<br>1001 = Amphotericin B<br>1002 = Colecalciferol (Vitamin D)<br>1003 = Creon<br>1004 = Dornase Alfa (Pulmozyme®)<br>1005 = Esomeprazole<br>1006 = Mannitol (Bronchitol®)<br>1007 = Mometasone (Nasonex®)<br>1008 = Omega-3<br>1009 = Salbutamol (Ventolin®)<br>1010 = Sodium chloride (salt)<br>1012 = Vitamin ASDICK capsules<br>1013 = Tezacaftor/ivacaftor and ivacaftor (symdeko®)<br>1014 = Ivacaftor (Kalydeco®)<br>1015 = Lumacaftor/ivacaftor (Orkambi®)<br>1016 = Hypertonic saline (RETIRE®)<br>1017 = Fluticasone propionate and salmeterol xinafo<br>1018 = Fluticasone propionate (Flixotide)<br>1019 = Ciclesonide (Avesco)<br>1020 = Beclomethasone dipropionate (QVAR)<br>1021 = Symbicort (Budesonide/Formoterol)<br>1022 = BREO (Fluticasone/Vilanterol)<br>1023 = Hypertonic saline 6%<br>1024 = Hypertonic saline 3%<br>1025 = Sodium chloride 0.9%<br>1026 = Elexacaftor/tezacaftor/ivacaftor (Trikafta)<br>9999 = Other study medication |                                                                                                                                                                                                                                                                                                                                                                                                                                                                                                                                                                                                                                                                                                                                                                                                                                                                                                                                                                                                                                                                                                                                                                                                                                                                                                             |
| 5   | Concomitant Medications                | 1.1a     | cmtrtoth             | Name of other medicine                                                                                                        |  | string      |                                                                                                                                                                                                                                                                                                                                                                                                                                                                                                                                                                                                                                                                                                                                                                                                                                                                                                                                                                                                                                                                                                                                                                                                                                                |                                                                                                                                                                                                                                                                                                                                                                                                                                                                                                                                                                                                                                                                                                                                                                                                                                                                                                                                                                                                                                                                                                                                                                                                                                                                                                             |
| 5   | Concomitant Medications                | 1.1.0    | cmtrfname            | Medication generic name as text                                                                                               |  | computed    |                                                                                                                                                                                                                                                                                                                                                                                                                                                                                                                                                                                                                                                                                                                                                                                                                                                                                                                                                                                                                                                                                                                                                                                                                                                |                                                                                                                                                                                                                                                                                                                                                                                                                                                                                                                                                                                                                                                                                                                                                                                                                                                                                                                                                                                                                                                                                                                                                                                                                                                                                                             |
| 5   | Concomitant Medications                | 1.2      | cmtrsdtd             | Start date                                                                                                                    |  | date        |                                                                                                                                                                                                                                                                                                                                                                                                                                                                                                                                                                                                                                                                                                                                                                                                                                                                                                                                                                                                                                                                                                                                                                                                                                                |                                                                                                                                                                                                                                                                                                                                                                                                                                                                                                                                                                                                                                                                                                                                                                                                                                                                                                                                                                                                                                                                                                                                                                                                                                                                                                             |
| 5   | Concomitant Medications                | 1.3      | cmongo               | Ongoing                                                                                                                       |  | boolean     | 0 = No<br>1 = Yes                                                                                                                                                                                                                                                                                                                                                                                                                                                                                                                                                                                                                                                                                                                                                                                                                                                                                                                                                                                                                                                                                                                                                                                                                              |                                                                                                                                                                                                                                                                                                                                                                                                                                                                                                                                                                                                                                                                                                                                                                                                                                                                                                                                                                                                                                                                                                                                                                                                                                                                                                             |
| 5   | Concomitant Medications                | 1.4      | cmendat              | Stop date                                                                                                                     |  | date        |                                                                                                                                                                                                                                                                                                                                                                                                                                                                                                                                                                                                                                                                                                                                                                                                                                                                                                                                                                                                                                                                                                                                                                                                                                                |                                                                                                                                                                                                                                                                                                                                                                                                                                                                                                                                                                                                                                                                                                                                                                                                                                                                                                                                                                                                                                                                                                                                                                                                                                                                                                             |
| 5   | Concomitant Medications                | 1.5      | cmdosefq             | Frequency                                                                                                                     |  | option      | 1 = Daily<br>2 = Twice a day<br>3 = Three times a day<br>4 = Four times a day<br>5 = Every second day<br>6 = Three times per week<br>7 = Weekly<br>8 = Every 2 weeks<br>9 = Monthly<br>10 = Alternate months<br>11 = As needed<br>12 = Continuous infusion<br>13 = Unknown<br>14 = Other                                                                                                                                                                                                                                                                                                                                                                                                                                                                                                                                                                                                                                                                                                                                                                                                                                                                                                                                                       |                                                                                                                                                                                                                                                                                                                                                                                                                                                                                                                                                                                                                                                                                                                                                                                                                                                                                                                                                                                                                                                                                                                                                                                                                                                                                                             |
| 5   | Concomitant Medications                | 1.2      | cmroute              | Route                                                                                                                         |  | option      | 1 = Inhalation<br>2 = Intramuscular<br>3 = Intravenous<br>4 = Oral (or gastrostomy)<br>5 = Subcutaneous<br>6 = Topical<br>7 = Other<br>99 = Not known                                                                                                                                                                                                                                                                                                                                                                                                                                                                                                                                                                                                                                                                                                                                                                                                                                                                                                                                                                                                                                                                                          |                                                                                                                                                                                                                                                                                                                                                                                                                                                                                                                                                                                                                                                                                                                                                                                                                                                                                                                                                                                                                                                                                                                                                                                                                                                                                                             |
| 6   | Intensive Therapy Commencement - Da    | 1.1      | itersdtd             | Admission date for intensive therapy                                                                                          |  | date        |                                                                                                                                                                                                                                                                                                                                                                                                                                                                                                                                                                                                                                                                                                                                                                                                                                                                                                                                                                                                                                                                                                                                                                                                                                                |                                                                                                                                                                                                                                                                                                                                                                                                                                                                                                                                                                                                                                                                                                                                                                                                                                                                                                                                                                                                                                                                                                                                                                                                                                                                                                             |
| 6   | Intensive Therapy Commencement - Day 0 | 1.1      | itersendtd           | Intensive therapy end date                                                                                                    |  | computed    |                                                                                                                                                                                                                                                                                                                                                                                                                                                                                                                                                                                                                                                                                                                                                                                                                                                                                                                                                                                                                                                                                                                                                                                                                                                |                                                                                                                                                                                                                                                                                                                                                                                                                                                                                                                                                                                                                                                                                                                                                                                                                                                                                                                                                                                                                                                                                                                                                                                                                                                                                                             |
| 6   | Intensive Therapy Commencement - Da    | 1.2      | itersloc             | Admission location (where intensive therapy will begin)                                                                       |  | option      | 1 = Hospital<br>2 = HITH                                                                                                                                                                                                                                                                                                                                                                                                                                                                                                                                                                                                                                                                                                                                                                                                                                                                                                                                                                                                                                                                                                                                                                                                                       |                                                                                                                                                                                                                                                                                                                                                                                                                                                                                                                                                                                                                                                                                                                                                                                                                                                                                                                                                                                                                                                                                                                                                                                                                                                                                                             |
| 6   | Intensive Therapy Commencement - Da    | 1.2.1    | itershosp            | Hospital                                                                                                                      |  | option      | 1 = Current hospital<br>2 = Regional hospital                                                                                                                                                                                                                                                                                                                                                                                                                                                                                                                                                                                                                                                                                                                                                                                                                                                                                                                                                                                                                                                                                                                                                                                                  |                                                                                                                                                                                                                                                                                                                                                                                                                                                                                                                                                                                                                                                                                                                                                                                                                                                                                                                                                                                                                                                                                                                                                                                                                                                                                                             |
| 6   | Intensive Therapy Commencement - Da    | 1.2.2    | admitweight          | Weight                                                                                                                        |  | decimal     | kg                                                                                                                                                                                                                                                                                                                                                                                                                                                                                                                                                                                                                                                                                                                                                                                                                                                                                                                                                                                                                                                                                                                                                                                                                                             |                                                                                                                                                                                                                                                                                                                                                                                                                                                                                                                                                                                                                                                                                                                                                                                                                                                                                                                                                                                                                                                                                                                                                                                                                                                                                                             |
| 6   | Intensive Therapy Commencement - Da    | 1.3      | itrand               | Will the participant be randomised for this intensive therapy?                                                                |  | boolean     | 0 = No<br>1 = Yes                                                                                                                                                                                                                                                                                                                                                                                                                                                                                                                                                                                                                                                                                                                                                                                                                                                                                                                                                                                                                                                                                                                                                                                                                              |                                                                                                                                                                                                                                                                                                                                                                                                                                                                                                                                                                                                                                                                                                                                                                                                                                                                                                                                                                                                                                                                                                                                                                                                                                                                                                             |
| 6   | Intensive Therapy Commencement - Da    | 1.3.1    | itrandreas           | Reason for the exacerbation not being randomised                                                                              |  | option      | 1 = Patient choice<br>2 = Clinician choice<br>3 = Logistics<br>9 = Other                                                                                                                                                                                                                                                                                                                                                                                                                                                                                                                                                                                                                                                                                                                                                                                                                                                                                                                                                                                                                                                                                                                                                                       |                                                                                                                                                                                                                                                                                                                                                                                                                                                                                                                                                                                                                                                                                                                                                                                                                                                                                                                                                                                                                                                                                                                                                                                                                                                                                                             |
| 6   | Intensive Therapy Commencement - Da    | 1.3.2    | itrandexp            | Briefly explain the reason (this will help interpretation of the generalisability of any results from BEAT CF randomisations) |  | text        |                                                                                                                                                                                                                                                                                                                                                                                                                                                                                                                                                                                                                                                                                                                                                                                                                                                                                                                                                                                                                                                                                                                                                                                                                                                |                                                                                                                                                                                                                                                                                                                                                                                                                                                                                                                                                                                                                                                                                                                                                                                                                                                                                                                                                                                                                                                                                                                                                                                                                                                                                                             |
| 6   | Intensive Therapy Commencement - Da    | 2.1      | admitcoughtp         | Cough type                                                                                                                    |  | option      | 1 = Wet<br>2 = Dry                                                                                                                                                                                                                                                                                                                                                                                                                                                                                                                                                                                                                                                                                                                                                                                                                                                                                                                                                                                                                                                                                                                                                                                                                             |                                                                                                                                                                                                                                                                                                                                                                                                                                                                                                                                                                                                                                                                                                                                                                                                                                                                                                                                                                                                                                                                                                                                                                                                                                                                                                             |
| 6   | Intensive Therapy Commencement - Da    | 2.1a     | admitcoughtpna       | Not done                                                                                                                      |  | checkbox    | 0 = No<br>1 = Yes                                                                                                                                                                                                                                                                                                                                                                                                                                                                                                                                                                                                                                                                                                                                                                                                                                                                                                                                                                                                                                                                                                                                                                                                                              |                                                                                                                                                                                                                                                                                                                                                                                                                                                                                                                                                                                                                                                                                                                                                                                                                                                                                                                                                                                                                                                                                                                                                                                                                                                                                                             |
| 6   | Intensive Therapy Commencement - Da    | 2.2      | admitcrepit          | Crepitations                                                                                                                  |  | boolean     | 0 = No<br>1 = Yes                                                                                                                                                                                                                                                                                                                                                                                                                                                                                                                                                                                                                                                                                                                                                                                                                                                                                                                                                                                                                                                                                                                                                                                                                              |                                                                                                                                                                                                                                                                                                                                                                                                                                                                                                                                                                                                                                                                                                                                                                                                                                                                                                                                                                                                                                                                                                                                                                                                                                                                                                             |
| 6   | Intensive Therapy Commencement - Da    | 2.2a     | admitcrepitna        | Not done                                                                                                                      |  | checkbox    | 0 = No<br>1 = Yes                                                                                                                                                                                                                                                                                                                                                                                                                                                                                                                                                                                                                                                                                                                                                                                                                                                                                                                                                                                                                                                                                                                                                                                                                              |                                                                                                                                                                                                                                                                                                                                                                                                                                                                                                                                                                                                                                                                                                                                                                                                                                                                                                                                                                                                                                                                                                                                                                                                                                                                                                             |
| 6   | Intensive Therapy Commencement - Da    | 3.1      | itplanabx            | Antibiotics?                                                                                                                  |  | boolean     | 0 = No<br>1 = Yes                                                                                                                                                                                                                                                                                                                                                                                                                                                                                                                                                                                                                                                                                                                                                                                                                                                                                                                                                                                                                                                                                                                                                                                                                              |                                                                                                                                                                                                                                                                                                                                                                                                                                                                                                                                                                                                                                                                                                                                                                                                                                                                                                                                                                                                                                                                                                                                                                                                                                                                                                             |
| 6   | Intensive Therapy Commencement - Da    | 3.2      | itplanit             | Inhaled therapies?                                                                                                            |  | boolean     | 0 = No<br>1 = Yes                                                                                                                                                                                                                                                                                                                                                                                                                                                                                                                                                                                                                                                                                                                                                                                                                                                                                                                                                                                                                                                                                                                                                                                                                              |                                                                                                                                                                                                                                                                                                                                                                                                                                                                                                                                                                                                                                                                                                                                                                                                                                                                                                                                                                                                                                                                                                                                                                                                                                                                                                             |
| 6   | Intensive Therapy Commencement - Da    | 3.3      | itplanai             | Anti-inflammatory treatments?                                                                                                 |  | boolean     | 0 = No<br>1 = Yes                                                                                                                                                                                                                                                                                                                                                                                                                                                                                                                                                                                                                                                                                                                                                                                                                                                                                                                                                                                                                                                                                                                                                                                                                              |                                                                                                                                                                                                                                                                                                                                                                                                                                                                                                                                                                                                                                                                                                                                                                                                                                                                                                                                                                                                                                                                                                                                                                                                                                                                                                             |
| 6   | Intensive Therapy Commencement - Da    | 3.4      | itplanph             | Physiotherapy?                                                                                                                |  | boolean     | 0 = No<br>1 = Yes                                                                                                                                                                                                                                                                                                                                                                                                                                                                                                                                                                                                                                                                                                                                                                                                                                                                                                                                                                                                                                                                                                                                                                                                                              |                                                                                                                                                                                                                                                                                                                                                                                                                                                                                                                                                                                                                                                                                                                                                                                                                                                                                                                                                                                                                                                                                                                                                                                                                                                                                                             |
| 7.1 | Antibiotic Treatment                   |          | intensive_therapy_id | Intensive therapy ID                                                                                                          |  | linked_form |                                                                                                                                                                                                                                                                                                                                                                                                                                                                                                                                                                                                                                                                                                                                                                                                                                                                                                                                                                                                                                                                                                                                                                                                                                                |                                                                                                                                                                                                                                                                                                                                                                                                                                                                                                                                                                                                                                                                                                                                                                                                                                                                                                                                                                                                                                                                                                                                                                                                                                                                                                             |

|     |                             |         |                      |                                                          |  |             |         |                                                                                                                                                                                                                                                                                                                                                                                                                                                                                                                                                                                                                                                                                                                                                                                                                                                                                                                                                                                                                                                                                                                                                                                                                                                       |
|-----|-----------------------------|---------|----------------------|----------------------------------------------------------|--|-------------|---------|-------------------------------------------------------------------------------------------------------------------------------------------------------------------------------------------------------------------------------------------------------------------------------------------------------------------------------------------------------------------------------------------------------------------------------------------------------------------------------------------------------------------------------------------------------------------------------------------------------------------------------------------------------------------------------------------------------------------------------------------------------------------------------------------------------------------------------------------------------------------------------------------------------------------------------------------------------------------------------------------------------------------------------------------------------------------------------------------------------------------------------------------------------------------------------------------------------------------------------------------------------|
| 7.1 | Antibiotic Treatment        | 1.1     | abxname              | Generic name                                             |  | option      |         | 2 = Amoxicillin clavulanate<br>4 = Amikacin<br>5 = Amphotericin B<br>6 = Ampicillin<br>7 = Azithromycin<br>8 = Aztreonam<br>9 = Caspofungin<br>10 = Cefaclor<br>11 = Cefazolin<br>12 = Cefepime<br>13 = Cefotaxime<br>14 = Ceftriaxone<br>15 = Ceftazidime<br>59 = Ceftazidime/avibactam<br>16 = Cephalosin<br>17 = Cephalothin<br>18 = Chloramphenicol<br>19 = Ciprofloxacin<br>20 = Clarithromycin<br>21 = Clindamycin<br>22 = Colistin<br>23 = Cotrimoxazole (Trimethoprim and sulfamethoxazole)<br>24 = Daptomycin<br>25 = Dicloxacillin<br>26 = Doxycycline<br>27 = Ertapenem<br>28 = Erythromycin<br>29 = Flucloxacillin<br>30 = Fluconazole<br>31 = Fosfomycin<br>32 = Fusidic acid<br>33 = Gentamicin<br>34 = Imipenem<br>35 = Itraconazole<br>36 = Ketoconazole<br>37 = Linezolid<br>38 = Meropenem<br>39 = Metronidazole<br>41 = Moxifloxacin<br>42 = Mupirocin<br>43 = Nitrofurantoin<br>44 = Norfloxacin<br>45 = Ofloxacin<br>46 = Penicillin/benzylpenicillin<br>47 = Piperacillin tazobactam (Tazocin)<br>48 = Posaconazole<br>49 = Rifampicin<br>50 = Telicoplanin<br>51 = Tetracycline<br>52 = Ticarcillin clavulanate (Timentin)<br>53 = Tigecycline<br>54 = Tobramycin<br>55 = Trimethoprim<br>56 = Vancomycin<br>57 = Voriconazole |
| 7.1 | Antibiotic Treatment        | 1.2     | abxtype              | Type                                                     |  | option      |         | 1 = Backbone<br>2 = Adjunct                                                                                                                                                                                                                                                                                                                                                                                                                                                                                                                                                                                                                                                                                                                                                                                                                                                                                                                                                                                                                                                                                                                                                                                                                           |
| 7.1 | Antibiotic Treatment        | 1.3     | abxstartdatm         | Start date/time                                          |  | datetime    |         |                                                                                                                                                                                                                                                                                                                                                                                                                                                                                                                                                                                                                                                                                                                                                                                                                                                                                                                                                                                                                                                                                                                                                                                                                                                       |
| 7.1 | Antibiotic Treatment        | 1.4     | abxdose              | Dose                                                     |  | decimal     |         |                                                                                                                                                                                                                                                                                                                                                                                                                                                                                                                                                                                                                                                                                                                                                                                                                                                                                                                                                                                                                                                                                                                                                                                                                                                       |
| 7.1 | Antibiotic Treatment        | 1.4a    | abxunit              | Unit                                                     |  | option      |         | 1 = milligrams (mg)<br>2 = millilitres (mL)<br>3 = micrograms (mcg)<br>4 = (international) units                                                                                                                                                                                                                                                                                                                                                                                                                                                                                                                                                                                                                                                                                                                                                                                                                                                                                                                                                                                                                                                                                                                                                      |
| 7.1 | Antibiotic Treatment        | 1.5     | abxroute             | Route                                                    |  | option      |         | 1 = Inhalation<br>2 = Intramuscular<br>3 = Intravenous<br>4 = Oral (or gastrostomy)<br>5 = Subcutaneous<br>6 = Topical                                                                                                                                                                                                                                                                                                                                                                                                                                                                                                                                                                                                                                                                                                                                                                                                                                                                                                                                                                                                                                                                                                                                |
| 7.1 | Antibiotic Treatment        | 1.6     | abxfreq              | Frequency                                                |  | option      |         | 1 = Daily<br>2 = Twice a day<br>3 = Three times a day<br>4 = Four times a day<br>5 = Every second day<br>6 = Monthly<br>7 = As needed<br>8 = Continuous infusion<br>9 = Unknown<br>10 = Other                                                                                                                                                                                                                                                                                                                                                                                                                                                                                                                                                                                                                                                                                                                                                                                                                                                                                                                                                                                                                                                         |
| 7.1 | Antibiotic Treatment        | 1.6.1   | abxdur               | Duration                                                 |  | option      |         | 1 = Less than 1 hour<br>2 = 1 or more but less than 6 hours<br>3 = 6 or more hours                                                                                                                                                                                                                                                                                                                                                                                                                                                                                                                                                                                                                                                                                                                                                                                                                                                                                                                                                                                                                                                                                                                                                                    |
| 7.1 | Antibiotic Treatment        | 1.7     | abxstopdatm          | Stop date/time                                           |  | datetime    |         |                                                                                                                                                                                                                                                                                                                                                                                                                                                                                                                                                                                                                                                                                                                                                                                                                                                                                                                                                                                                                                                                                                                                                                                                                                                       |
| 7.1 | Antibiotic Treatment        | 1.7.1   | abxstoprsn           | Reason antibiotic stopped                                |  | option      |         | 1 = Completed<br>2 = Unsatisfactory response<br>3 = Adverse reaction<br>4 = New micro results<br>5 = Not available<br>7 = Dose adjustment<br>6 = Other                                                                                                                                                                                                                                                                                                                                                                                                                                                                                                                                                                                                                                                                                                                                                                                                                                                                                                                                                                                                                                                                                                |
| 7.1 | Antibiotic Treatment        | 1.7.1a  | abxstoprsnoth        | Specify                                                  |  | string      |         |                                                                                                                                                                                                                                                                                                                                                                                                                                                                                                                                                                                                                                                                                                                                                                                                                                                                                                                                                                                                                                                                                                                                                                                                                                                       |
| 7.1 | Antibiotic Treatment        | 1.7.2   | abxmissdoses         | Number of missed doses during this course of antibiotics |  | integer     |         |                                                                                                                                                                                                                                                                                                                                                                                                                                                                                                                                                                                                                                                                                                                                                                                                                                                                                                                                                                                                                                                                                                                                                                                                                                                       |
| 7.1 | Antibiotic Treatment        | 1.7.2.1 | abxmissdatm1         | Date and time                                            |  | datetime    |         |                                                                                                                                                                                                                                                                                                                                                                                                                                                                                                                                                                                                                                                                                                                                                                                                                                                                                                                                                                                                                                                                                                                                                                                                                                                       |
| 7.1 | Antibiotic Treatment        | 1.7.2.2 | abxmissdatm2         | Date and time                                            |  | datetime    |         |                                                                                                                                                                                                                                                                                                                                                                                                                                                                                                                                                                                                                                                                                                                                                                                                                                                                                                                                                                                                                                                                                                                                                                                                                                                       |
| 7.1 | Antibiotic Treatment        | 1.7.2.3 | abxmissdatm3         | Date and time                                            |  | datetime    |         |                                                                                                                                                                                                                                                                                                                                                                                                                                                                                                                                                                                                                                                                                                                                                                                                                                                                                                                                                                                                                                                                                                                                                                                                                                                       |
| 7.1 | Antibiotic Treatment        | 1.7.2.4 | abxmissdatm4         | Date and time                                            |  | datetime    |         |                                                                                                                                                                                                                                                                                                                                                                                                                                                                                                                                                                                                                                                                                                                                                                                                                                                                                                                                                                                                                                                                                                                                                                                                                                                       |
| 7.1 | Antibiotic Treatment        | 1.7.2.5 | abxmissdatm5         | Date and time                                            |  | datetime    |         |                                                                                                                                                                                                                                                                                                                                                                                                                                                                                                                                                                                                                                                                                                                                                                                                                                                                                                                                                                                                                                                                                                                                                                                                                                                       |
| 7.1 | Antibiotic Treatment        | 1.7.2.6 | abxmissdatm6         | Date and time                                            |  | datetime    |         |                                                                                                                                                                                                                                                                                                                                                                                                                                                                                                                                                                                                                                                                                                                                                                                                                                                                                                                                                                                                                                                                                                                                                                                                                                                       |
| 7.2 | Inhaled Therapy Treatment   |         | intensive_therapy_id | Intensive therapy ID                                     |  | linked_form |         |                                                                                                                                                                                                                                                                                                                                                                                                                                                                                                                                                                                                                                                                                                                                                                                                                                                                                                                                                                                                                                                                                                                                                                                                                                                       |
| 7.2 | Inhaled Therapy Treatment   | 1.1     | ittrt                | Generic name                                             |  | option      |         | 1 = Dornase alpha (Pulmozyme)<br>2 = Mannitol (bronchitol)<br>3 = Hypertonic saline<br>4 = Salbutamol<br>5 = Fluticasone propionate and salmeterol xinafoate<br>6 = Fluticasone propionate (Flixotide)<br>7 = Ciclesonide (Alvesco)<br>8 = Beclomethasone dipropionate (QVAR)<br>9 = Symbicort (Budesonide/Formoterol)<br>10 = BREO (Fluticasone/Vilanterol)<br>99 = Other                                                                                                                                                                                                                                                                                                                                                                                                                                                                                                                                                                                                                                                                                                                                                                                                                                                                            |
| 7.2 | Inhaled Therapy Treatment   | 1.1a    | ittrtoth             | Specify                                                  |  | string      |         |                                                                                                                                                                                                                                                                                                                                                                                                                                                                                                                                                                                                                                                                                                                                                                                                                                                                                                                                                                                                                                                                                                                                                                                                                                                       |
| 7.2 | Inhaled Therapy Treatment   | 1.2     | itstartdat           | Start date                                               |  | date        |         |                                                                                                                                                                                                                                                                                                                                                                                                                                                                                                                                                                                                                                                                                                                                                                                                                                                                                                                                                                                                                                                                                                                                                                                                                                                       |
| 7.2 | Inhaled Therapy Treatment   | 1.3     | itdose               | Dose                                                     |  | decimal     |         |                                                                                                                                                                                                                                                                                                                                                                                                                                                                                                                                                                                                                                                                                                                                                                                                                                                                                                                                                                                                                                                                                                                                                                                                                                                       |
| 7.2 | Inhaled Therapy Treatment   | 1.4     | itdosu               | Units                                                    |  | option      |         | 1 = milligrams (mg)<br>2 = millilitres (mL)<br>3 = micrograms (mcg)<br>4 = (international) units                                                                                                                                                                                                                                                                                                                                                                                                                                                                                                                                                                                                                                                                                                                                                                                                                                                                                                                                                                                                                                                                                                                                                      |
| 7.2 | Inhaled Therapy Treatment   | 1.5     | itfreq               | Frequency                                                |  | option      |         | 1 = Daily<br>2 = Twice a day<br>3 = Three times a day<br>4 = Four times a day<br>5 = Every second day<br>6 = Three times per week<br>7 = Weekly<br>8 = Every 2 weeks<br>9 = Monthly<br>10 = Alternate months<br>11 = As needed<br>12 = Continuous infusion<br>13 = Unknown<br>14 = Other                                                                                                                                                                                                                                                                                                                                                                                                                                                                                                                                                                                                                                                                                                                                                                                                                                                                                                                                                              |
| 7.2 | Inhaled Therapy Treatment   | 1.6     | itstopdat            | Stop date                                                |  | date        |         |                                                                                                                                                                                                                                                                                                                                                                                                                                                                                                                                                                                                                                                                                                                                                                                                                                                                                                                                                                                                                                                                                                                                                                                                                                                       |
| 7.3 | Anti-inflammatory Treatment |         | intensive_therapy_id | Intensive therapy ID                                     |  | linked_form |         |                                                                                                                                                                                                                                                                                                                                                                                                                                                                                                                                                                                                                                                                                                                                                                                                                                                                                                                                                                                                                                                                                                                                                                                                                                                       |
| 7.3 | Anti-inflammatory Treatment | 1.1     | aitrt                | Generic name                                             |  | option      |         | 1 = Azithromycin<br>2 = Prednisolone<br>3 = NSAID                                                                                                                                                                                                                                                                                                                                                                                                                                                                                                                                                                                                                                                                                                                                                                                                                                                                                                                                                                                                                                                                                                                                                                                                     |
| 7.3 | Anti-inflammatory Treatment | 1.1a    | aitrtsaid            | Generic name                                             |  | string      |         |                                                                                                                                                                                                                                                                                                                                                                                                                                                                                                                                                                                                                                                                                                                                                                                                                                                                                                                                                                                                                                                                                                                                                                                                                                                       |
| 7.3 | Anti-inflammatory Treatment | 1.2     | aitstartdat          | Start date                                               |  | date        |         |                                                                                                                                                                                                                                                                                                                                                                                                                                                                                                                                                                                                                                                                                                                                                                                                                                                                                                                                                                                                                                                                                                                                                                                                                                                       |
| 7.3 | Anti-inflammatory Treatment | 1.3     | aitdose              | Dose                                                     |  | decimal     |         |                                                                                                                                                                                                                                                                                                                                                                                                                                                                                                                                                                                                                                                                                                                                                                                                                                                                                                                                                                                                                                                                                                                                                                                                                                                       |
| 7.3 | Anti-inflammatory Treatment | 1.4     | aitdosu              | Dose Units                                               |  | option      |         | 1 = milligrams (mg)<br>2 = millilitres (mL)<br>3 = micrograms (mcg)<br>4 = (international) units                                                                                                                                                                                                                                                                                                                                                                                                                                                                                                                                                                                                                                                                                                                                                                                                                                                                                                                                                                                                                                                                                                                                                      |
| 7.3 | Anti-inflammatory Treatment | 1.5     | aitfreq              | Frequency                                                |  | option      |         | 1 = Daily<br>2 = Twice a day<br>3 = Three times a day<br>4 = Four times a day<br>5 = Every second day<br>6 = Three times per week<br>7 = Weekly<br>8 = Every 2 weeks<br>9 = Monthly<br>10 = Alternate months<br>11 = As needed<br>12 = Continuous infusion<br>13 = Unknown<br>14 = Other                                                                                                                                                                                                                                                                                                                                                                                                                                                                                                                                                                                                                                                                                                                                                                                                                                                                                                                                                              |
| 7.3 | Anti-inflammatory Treatment | 1.6     | aitstopdat           | Stop date                                                |  | date        |         |                                                                                                                                                                                                                                                                                                                                                                                                                                                                                                                                                                                                                                                                                                                                                                                                                                                                                                                                                                                                                                                                                                                                                                                                                                                       |
| 7.4 | Physiotherapy Treatment     |         | intensive_therapy_id | Intensive therapy ID                                     |  | linked_form |         |                                                                                                                                                                                                                                                                                                                                                                                                                                                                                                                                                                                                                                                                                                                                                                                                                                                                                                                                                                                                                                                                                                                                                                                                                                                       |
| 7.4 | Physiotherapy Treatment     | 1.1     | phassdat             | Date Assessed                                            |  | date        |         |                                                                                                                                                                                                                                                                                                                                                                                                                                                                                                                                                                                                                                                                                                                                                                                                                                                                                                                                                                                                                                                                                                                                                                                                                                                       |
| 7.4 | Physiotherapy Treatment     | 1.2     | phasswk              | Week of treatment                                        |  | integer     |         |                                                                                                                                                                                                                                                                                                                                                                                                                                                                                                                                                                                                                                                                                                                                                                                                                                                                                                                                                                                                                                                                                                                                                                                                                                                       |
| 7.4 | Physiotherapy Treatment     | 2.1     | phactact             | ACBT (Active Cycle of breathing technique)               |  | boolean     |         | 1 = Yes<br>0 = No                                                                                                                                                                                                                                                                                                                                                                                                                                                                                                                                                                                                                                                                                                                                                                                                                                                                                                                                                                                                                                                                                                                                                                                                                                     |
| 7.4 | Physiotherapy Treatment     | 2.1.1   | phactactbss          | Total number of physio sessions in past 7 days           |  | integer     |         |                                                                                                                                                                                                                                                                                                                                                                                                                                                                                                                                                                                                                                                                                                                                                                                                                                                                                                                                                                                                                                                                                                                                                                                                                                                       |
| 7.4 | Physiotherapy Treatment     | 2.1.2   | phactactbdur         | Average duration of treatment per session                |  | option      | minutes | 1 = 1-10<br>2 = 11-20<br>3 = 21-30<br>4 = 31-40<br>5 = > 40                                                                                                                                                                                                                                                                                                                                                                                                                                                                                                                                                                                                                                                                                                                                                                                                                                                                                                                                                                                                                                                                                                                                                                                           |
| 7.4 | Physiotherapy Treatment     | 2.1.3   | phactactbsup         | Number of physio sessions supervised in the past 7 days  |  | integer     |         |                                                                                                                                                                                                                                                                                                                                                                                                                                                                                                                                                                                                                                                                                                                                                                                                                                                                                                                                                                                                                                                                                                                                                                                                                                                       |
| 7.4 | Physiotherapy Treatment     | 2.1.4   | phactactbinh         | Was inhalation combined with this ACT (not before)?      |  | boolean     |         | 1 = Yes<br>0 = No                                                                                                                                                                                                                                                                                                                                                                                                                                                                                                                                                                                                                                                                                                                                                                                                                                                                                                                                                                                                                                                                                                                                                                                                                                     |
| 7.4 | Physiotherapy Treatment     | 2.2     | phactaad             | AD/AAD (Autogenic Drainage/Assisted)                     |  | boolean     |         | 1 = Yes<br>0 = No                                                                                                                                                                                                                                                                                                                                                                                                                                                                                                                                                                                                                                                                                                                                                                                                                                                                                                                                                                                                                                                                                                                                                                                                                                     |
| 7.4 | Physiotherapy Treatment     | 2.2.1   | phactaadss           | Total number of physio sessions in the past 7 days       |  | integer     |         |                                                                                                                                                                                                                                                                                                                                                                                                                                                                                                                                                                                                                                                                                                                                                                                                                                                                                                                                                                                                                                                                                                                                                                                                                                                       |
| 7.4 | Physiotherapy Treatment     | 2.2.2   | phactaadur           | Average duration of treatment per session                |  | option      | minutes | 1 = 1-10<br>2 = 11-20<br>3 = 21-30<br>4 = 31-40<br>5 = > 40                                                                                                                                                                                                                                                                                                                                                                                                                                                                                                                                                                                                                                                                                                                                                                                                                                                                                                                                                                                                                                                                                                                                                                                           |

|     |                                            |         |                      |                                                                                                     |             |         |                                                             |
|-----|--------------------------------------------|---------|----------------------|-----------------------------------------------------------------------------------------------------|-------------|---------|-------------------------------------------------------------|
| 7.4 | Physiotherapy Treatment                    | 2.2.3   | phactaadsup          | Number of physio sessions supervised in the past 7 days                                             | integer     |         |                                                             |
| 7.4 | Physiotherapy Treatment                    | 2.2.4   | phactaadinh          | Was inhalation combined with this ACT (not before)?                                                 | boolean     |         | 1 = Yes<br>0 = No                                           |
| 7.4 | Physiotherapy Treatment                    | 2.3     | phactpep             | PEP (Positive Expiratory Pressure)                                                                  | boolean     |         | 1 = Yes<br>0 = No                                           |
| 7.4 | Physiotherapy Treatment                    | 2.3.1   | phactpepsess         | Total number of physio sessions in the past 7 days                                                  | integer     |         |                                                             |
| 7.4 | Physiotherapy Treatment                    | 2.3.2   | phactpepdur          | Average duration of treatment per session                                                           | option      | minutes | 1 = 1-10<br>2 = 11-20<br>3 = 21-30<br>4 = 31-40<br>5 = > 40 |
| 7.4 | Physiotherapy Treatment                    | 2.3.3   | phactpepsup          | Number of physio sessions supervised in the past 7 days                                             | integer     |         |                                                             |
| 7.4 | Physiotherapy Treatment                    | 2.3.4   | phactpepinh          | Was inhalation combined with this ACT (not before)?                                                 | boolean     |         | 1 = Yes<br>0 = No                                           |
| 7.4 | Physiotherapy Treatment                    | 2.4     | phactopep            | Osc-PEP (Oscillating Positive Expiratory Pressure)                                                  | boolean     |         | 1 = Yes<br>0 = No                                           |
| 7.4 | Physiotherapy Treatment                    | 2.4.1   | phactopepsess        | Total number of physio sessions in the past 7 days                                                  | integer     |         |                                                             |
| 7.4 | Physiotherapy Treatment                    | 2.4.2   | phactopepdur         | Average duration of treatment per session                                                           | option      | minutes | 1 = 1-10<br>2 = 11-20<br>3 = 21-30<br>4 = 31-40<br>5 = > 40 |
| 7.4 | Physiotherapy Treatment                    | 2.4.3   | phactopepsup         | Number of physio sessions supervised in the past 7 days                                             | integer     |         |                                                             |
| 7.4 | Physiotherapy Treatment                    | 2.4.4   | phactopepinh         | Was inhalation combined with this ACT (not before)?                                                 | boolean     |         | 1 = Yes<br>0 = No                                           |
| 7.4 | Physiotherapy Treatment                    | 2.5     | phactbpep            | Bubble/bottle PEP                                                                                   | boolean     |         | 1 = Yes<br>0 = No                                           |
| 7.4 | Physiotherapy Treatment                    | 2.5.1   | phactbpepsess        | Total number of physio sessions in the past 7 days                                                  | integer     |         |                                                             |
| 7.4 | Physiotherapy Treatment                    | 2.5.2   | phactbpepdur         | Average duration of treatment per session                                                           | option      | minutes | 1 = 1-10<br>2 = 11-20<br>3 = 21-30<br>4 = 31-40<br>5 = > 40 |
| 7.4 | Physiotherapy Treatment                    | 2.5.3   | phactbpepsup         | Number of physio sessions supervised in the past 7 days                                             | integer     |         |                                                             |
| 7.4 | Physiotherapy Treatment                    | 2.5.4   | phactbpepinh         | Was inhalation combined with this ACT (not before)?                                                 | boolean     |         | 1 = Yes<br>0 = No                                           |
| 7.4 | Physiotherapy Treatment                    | 2.6     | phactnrv             | Non-invasive ventilation                                                                            | boolean     |         | 1 = Yes<br>0 = No                                           |
| 7.4 | Physiotherapy Treatment                    | 2.6.1   | phactnrvsess         | Total number of physio sessions in the past 7 days                                                  | integer     |         |                                                             |
| 7.4 | Physiotherapy Treatment                    | 2.6.2   | phactnrvdur          | Average duration of treatment per session                                                           | option      | minutes | 1 = 1-10<br>2 = 11-20<br>3 = 21-30<br>4 = 31-40<br>5 = > 40 |
| 7.4 | Physiotherapy Treatment                    | 2.6.3   | phactnrvsup          | Number of physio sessions supervised in the past 7 days                                             | integer     |         |                                                             |
| 7.4 | Physiotherapy Treatment                    | 2.6.4   | phactnrvinh          | Was inhalation combined with this ACT (not before)?                                                 | boolean     |         | 1 = Yes<br>0 = No                                           |
| 7.4 | Physiotherapy Treatment                    | 2.7     | phactman             | Manual techniques                                                                                   | boolean     |         | 1 = Yes<br>0 = No                                           |
| 7.4 | Physiotherapy Treatment                    | 2.7.1   | phactmansess         | Total number of physio sessions in the past 7 days                                                  | integer     |         |                                                             |
| 7.4 | Physiotherapy Treatment                    | 2.7.2   | phactmandur          | Average duration of treatment per session                                                           | option      | minutes | 1 = 1-10<br>2 = 11-20<br>3 = 21-30<br>4 = 31-40<br>5 = > 40 |
| 7.4 | Physiotherapy Treatment                    | 2.7.3   | phactmansup          | Number of physio sessions supervised in the past 7 days                                             | integer     |         |                                                             |
| 7.4 | Physiotherapy Treatment                    | 2.7.4   | phactmaninh          | Was inhalation combined with this ACT (not before)?                                                 | boolean     |         | 1 = Yes<br>0 = No                                           |
| 7.4 | Physiotherapy Treatment                    | 2.8     | phactvest            | Vest (High frequency chest wall oscillation)                                                        | boolean     |         | 1 = Yes<br>0 = No                                           |
| 7.4 | Physiotherapy Treatment                    | 2.8.1   | phactvestsess        | Total number of physio sessions in the past 7 days                                                  | integer     |         |                                                             |
| 7.4 | Physiotherapy Treatment                    | 2.8.2   | phactvestdur         | Average duration of treatment per session                                                           | option      | minutes | 1 = 1-10<br>2 = 11-20<br>3 = 21-30<br>4 = 31-40<br>5 = > 40 |
| 7.4 | Physiotherapy Treatment                    | 2.8.3   | phactvestsup         | Number of physio sessions supervised in the past 7 days                                             | integer     |         |                                                             |
| 7.4 | Physiotherapy Treatment                    | 2.8.4   | phactvestinh         | Was inhalation combined with this ACT (not before)?                                                 | boolean     |         | 1 = Yes<br>0 = No                                           |
| 7.4 | Physiotherapy Treatment                    | 2.9     | phactexec            | Exercise                                                                                            | boolean     |         | 1 = Yes<br>0 = No                                           |
| 7.4 | Physiotherapy Treatment                    | 2.9.1   | phactexecsess        | Total number of physio sessions in the past 7 days                                                  | integer     |         |                                                             |
| 7.4 | Physiotherapy Treatment                    | 2.9.2   | phactexecdur         | Average duration of treatment per session                                                           | option      | minutes | 1 = 1-10<br>2 = 11-20<br>3 = 21-30<br>4 = 31-40<br>5 = > 40 |
| 7.4 | Physiotherapy Treatment                    | 2.9.3   | phactexecsup         | Number of physio sessions supervised in the past 7 days                                             | integer     |         |                                                             |
| 7.4 | Physiotherapy Treatment                    | 2.9.4   | phactexecinh         | Was inhalation combined with this ACT (not before)?                                                 | boolean     |         | 1 = Yes<br>0 = No                                           |
| 7.4 | Physiotherapy Treatment                    | 2.10    | phactmetaneb         | Metaneb                                                                                             | boolean     |         | 1 = Yes<br>0 = No                                           |
| 7.4 | Physiotherapy Treatment                    | 2.10.1  | phactmetanebsess     | Total number of physio sessions in the past 7 days                                                  | integer     |         |                                                             |
| 7.4 | Physiotherapy Treatment                    | 2.10.2  | phactmetanebdur      | Average duration of treatment per session                                                           | option      | minutes | 1 = 1-10<br>2 = 11-20<br>3 = 21-30<br>4 = 31-40<br>5 = > 40 |
| 7.4 | Physiotherapy Treatment                    | 2.10.3  | phactmetanebsup      | Number of physio sessions supervised in the past 7 days                                             | integer     |         |                                                             |
| 7.4 | Physiotherapy Treatment                    | 2.10.4  | phactmetanebinh      | Was inhalation combined with this ACT (not before)?                                                 | boolean     |         | 1 = Yes<br>0 = No                                           |
| 7.4 | Physiotherapy Treatment                    | 2.11    | phactoth             | Other                                                                                               | boolean     |         | 1 = Yes<br>0 = No                                           |
| 7.4 | Physiotherapy Treatment                    | 2.11.1  | phactothspec         | Specify                                                                                             | string      |         |                                                             |
| 7.4 | Physiotherapy Treatment                    | 2.11.2  | phactothsess         | Total number of physio sessions in the past 7 days                                                  | integer     |         |                                                             |
| 7.4 | Physiotherapy Treatment                    | 2.11.3  | phactothdur          | Average duration of treatment per session                                                           | option      | minutes | 1 = 1-10<br>2 = 11-20<br>3 = 21-30<br>4 = 31-40<br>5 = > 40 |
| 7.4 | Physiotherapy Treatment                    | 2.11.4  | phactothsup          | Number of physio sessions supervised in the past 7 days                                             | integer     |         |                                                             |
| 7.4 | Physiotherapy Treatment                    | 2.11.5  | phactothinh          | Was inhalation combined with this ACT (not before)?                                                 | boolean     |         | 1 = Yes<br>0 = No                                           |
| 7.4 | Physiotherapy Treatment                    | 3.1     | phexeaero            | Aerobic                                                                                             | boolean     |         | 1 = Yes<br>0 = No                                           |
| 7.4 | Physiotherapy Treatment                    | 3.1.1   | phexeaerosess        | Total number of physio sessions in the past 7 days                                                  | integer     |         |                                                             |
| 7.4 | Physiotherapy Treatment                    | 3.1.2   | phexeaerodur         | Average duration of exercise per session                                                            | option      | minutes | 1 = 1-10<br>2 = 11-20<br>3 = 21-30<br>4 = 31-40<br>5 = > 40 |
| 7.4 | Physiotherapy Treatment                    | 3.2     | phexeresist          | Resistance                                                                                          | boolean     |         | 1 = Yes<br>0 = No                                           |
| 7.4 | Physiotherapy Treatment                    | 3.2.1   | phexeresistsess      | Total number of physio sessions in the past 7 days                                                  | integer     |         |                                                             |
| 7.4 | Physiotherapy Treatment                    | 3.2.2   | phexeresistdur       | Average duration of exercise per session                                                            | option      | minutes | 1 = 1-10<br>2 = 11-20<br>3 = 21-30<br>4 = 31-40<br>5 = > 40 |
| 7.4 | Physiotherapy Treatment                    | 3.3     | phexehit             | High intensity interval training                                                                    | boolean     |         | 1 = Yes<br>0 = No                                           |
| 7.4 | Physiotherapy Treatment                    | 3.3.1   | phexehitsess         | Total number of physio sessions in the past 7 days                                                  | integer     |         |                                                             |
| 7.4 | Physiotherapy Treatment                    | 3.3.2   | phexehitdur          | Average duration of exercise per session                                                            | option      | minutes | 1 = 1-10<br>2 = 11-20<br>3 = 21-30<br>4 = 31-40<br>5 = > 40 |
| 7.4 | Physiotherapy Treatment                    | 3.4     | phexeplay            | Facilitated activity/play                                                                           | boolean     |         | 1 = Yes<br>0 = No                                           |
| 7.4 | Physiotherapy Treatment                    | 3.4.1   | phexeplaysess        | Total number of physio sessions in the past 7 days                                                  | integer     |         |                                                             |
| 7.4 | Physiotherapy Treatment                    | 3.4.2   | phexeplaydur         | Average duration of exercise per session                                                            | option      | minutes | 1 = 1-10<br>2 = 11-20<br>3 = 21-30<br>4 = 31-40<br>5 = > 40 |
| 7.4 | Physiotherapy Treatment                    | 3.5     | phexeoht             | Other                                                                                               | boolean     |         | 1 = Yes<br>0 = No                                           |
| 7.4 | Physiotherapy Treatment                    | 3.5.1   | phexeohtspec         | Specify                                                                                             | string      |         |                                                             |
| 7.4 | Physiotherapy Treatment                    | 3.5.2   | phexeohtsess         | Total number of physio sessions in the past 7 days                                                  | integer     |         |                                                             |
| 7.4 | Physiotherapy Treatment                    | 3.5.3   | phexeohtdur          | Average duration of exercise per session                                                            | option      | minutes | 1 = 1-10<br>2 = 11-20<br>3 = 21-30<br>4 = 31-40<br>5 = > 40 |
| 8   | Daily Treatment and Airways Review - Day 1 | Onw     | intensive_therapy_id | Intensive therapy ID                                                                                | linked_form |         |                                                             |
| 8   | Daily Treatment and Airways Review - D     | 1.1     | naxdate              | Assessment Date                                                                                     | date        |         |                                                             |
| 8   | Daily Treatment and Airways Review - D     | 1.2     | naxintrn             | Was the participant still receiving intensive therapy (IV antibiotics) today (between 00:00-23:59)? | boolean     |         | 1 = Yes<br>0 = No                                           |
| 8   | Daily Treatment and Airways Review - D     | 1.2.1   | naxlasdosdat         | Date of last dose of IV antibiotic treatment                                                        | date        |         |                                                             |
| 8   | Daily Treatment and Airways Review - D     | 1.3     | naxdischyn           | Was the participant discharged today (between 00:00-23:59)?                                         | boolean     |         | 1 = Yes<br>0 = No                                           |
| 8   | Daily Treatment and Airways Review - D     | 1.3.1   | naxloc               | Location of admission on this day                                                                   | option      |         | 1 = Hospital<br>2 = HTH                                     |
| 8   | Daily Treatment and Airways Review - D     | 1.3.1.1 | naxhosp              | Hospital                                                                                            | option      |         | 1 = Current hospital<br>2 = Regional hospital               |
| 8   | Daily Treatment and Airways Review - D     | 1.3.2   | naxdischdat          | Date of discharge                                                                                   | date        |         |                                                             |
| 8   | Daily Treatment and Airways Review - D     | 2.1     | caxcoughtp           | Describe the type of cough on request                                                               | option      |         | 1 = Wet<br>2 = Dry                                          |
| 8   | Daily Treatment and Airways Review - D     | 2.1a    | caxcoughtpna         | Not done                                                                                            | checkbox    |         | 0 = Yes<br>1 = No                                           |
| 8   | Daily Treatment and Airways Review - D     | 2.1.1   | caxcoughbest         | Is the cough back to how dry it usually is when this patient is well?                               | option      |         | 1 = Yes<br>0 = No<br>-1 = Unknown                           |
| 8   | Daily Treatment and Airways Review - D     | 2.2     | caxcrepit            | Creptitations                                                                                       | boolean     |         | 1 = Yes<br>0 = No                                           |
| 8   | Daily Treatment and Airways Review - D     | 2.2a    | caxcrepitna          | Not done                                                                                            | checkbox    |         | 0 = Yes<br>1 = No                                           |
| 8   | Daily Treatment and Airways Review - D     | 3.1     | naxabckchg           | Backbone antibiotic changed?                                                                        | boolean     |         | 1 = Yes<br>0 = No                                           |
| 8   | Daily Treatment and Airways Review - D     | 3.2     | naxabadjchg          | Adjunct antibiotic changed?                                                                         | boolean     |         | 1 = Yes<br>0 = No                                           |
| 8   | Daily Treatment and Airways Review - D     | 3.3     | naxabaddchg          | Any changes to additional antibiotics?                                                              | boolean     |         | 1 = Yes<br>0 = No                                           |

|    |                                                 |         |                      |                                                                                           |             |                      |                                                                                                                                                                                                                                                                                                                                                                                                                                                                                                                                                                                                                                                                                                                                                                                                                                                                                                                                                                                                                                                                                                                                                                                                                                                                  |
|----|-------------------------------------------------|---------|----------------------|-------------------------------------------------------------------------------------------|-------------|----------------------|------------------------------------------------------------------------------------------------------------------------------------------------------------------------------------------------------------------------------------------------------------------------------------------------------------------------------------------------------------------------------------------------------------------------------------------------------------------------------------------------------------------------------------------------------------------------------------------------------------------------------------------------------------------------------------------------------------------------------------------------------------------------------------------------------------------------------------------------------------------------------------------------------------------------------------------------------------------------------------------------------------------------------------------------------------------------------------------------------------------------------------------------------------------------------------------------------------------------------------------------------------------|
| 8  | Daily Treatment and Airways Review - D          | 3.3.1   | naxabaddchgrn        | Reason for change to additional antibiotic                                                | option      |                      | 1 = Completed<br>2 = Unsatisfactory response<br>3 = Adverse reaction<br>4 = New micro results<br>5 = Not available<br>7 = Dose adjustment<br>6 = Other                                                                                                                                                                                                                                                                                                                                                                                                                                                                                                                                                                                                                                                                                                                                                                                                                                                                                                                                                                                                                                                                                                           |
| 8  | Daily Treatment and Airways Review - D          | 4.1     | naxithchg            | Any changes to inhaled therapy treatment?                                                 | boolean     |                      | 1 = Yes<br>0 = No                                                                                                                                                                                                                                                                                                                                                                                                                                                                                                                                                                                                                                                                                                                                                                                                                                                                                                                                                                                                                                                                                                                                                                                                                                                |
| 8  | Daily Treatment and Airways Review - D          | 4.2     | naxainchg            | Any changes to anti-inflammatory treatment?                                               | boolean     |                      | 1 = Yes<br>0 = No                                                                                                                                                                                                                                                                                                                                                                                                                                                                                                                                                                                                                                                                                                                                                                                                                                                                                                                                                                                                                                                                                                                                                                                                                                                |
| 8  | Daily Treatment and Airways Review - D          | 5.1     | naxconchg            | Any new or changes to any current concomitant medications?                                | boolean     |                      | 1 = Yes<br>0 = No                                                                                                                                                                                                                                                                                                                                                                                                                                                                                                                                                                                                                                                                                                                                                                                                                                                                                                                                                                                                                                                                                                                                                                                                                                                |
| 8  | Daily Treatment and Airways Review - D          | 6.1     | naxmicro             | Were any new airway samples for microbiology taken?                                       | boolean     |                      | 1 = Yes<br>0 = No                                                                                                                                                                                                                                                                                                                                                                                                                                                                                                                                                                                                                                                                                                                                                                                                                                                                                                                                                                                                                                                                                                                                                                                                                                                |
| 9  | Physiotherapy Outcomes - Completed at end of Ir |         | intensive_therapy_id | Intensive therapy ID                                                                      | linked_form |                      |                                                                                                                                                                                                                                                                                                                                                                                                                                                                                                                                                                                                                                                                                                                                                                                                                                                                                                                                                                                                                                                                                                                                                                                                                                                                  |
| 9  | Physiotherapy Outcomes - Completed at           | 1.1     | phoutdat             | Date of completion of this form                                                           | date        |                      |                                                                                                                                                                                                                                                                                                                                                                                                                                                                                                                                                                                                                                                                                                                                                                                                                                                                                                                                                                                                                                                                                                                                                                                                                                                                  |
| 9  | Physiotherapy Outcomes - Completed at           | 1.2     | phout6min            | Was 6 Minute Walk Test Performed?                                                         | boolean     |                      | 1 = Yes<br>0 = No                                                                                                                                                                                                                                                                                                                                                                                                                                                                                                                                                                                                                                                                                                                                                                                                                                                                                                                                                                                                                                                                                                                                                                                                                                                |
| 9  | Physiotherapy Outcomes - Completed at           | 1.2.1   | phout6minres         | Result                                                                                    | integer     | m                    |                                                                                                                                                                                                                                                                                                                                                                                                                                                                                                                                                                                                                                                                                                                                                                                                                                                                                                                                                                                                                                                                                                                                                                                                                                                                  |
| 9  | Physiotherapy Outcomes - Completed at           | 1.2.2   | phout6mindat         | Date                                                                                      | date        |                      |                                                                                                                                                                                                                                                                                                                                                                                                                                                                                                                                                                                                                                                                                                                                                                                                                                                                                                                                                                                                                                                                                                                                                                                                                                                                  |
| 9  | Physiotherapy Outcomes - Completed at           | 1.3     | phoutmodsh           | Was Modified Shuttle Test Performed?                                                      | boolean     |                      | 1 = Yes<br>0 = No                                                                                                                                                                                                                                                                                                                                                                                                                                                                                                                                                                                                                                                                                                                                                                                                                                                                                                                                                                                                                                                                                                                                                                                                                                                |
| 9  | Physiotherapy Outcomes - Completed at           | 1.3.1   | phoutmodshres        | Result                                                                                    | decimal     | level                |                                                                                                                                                                                                                                                                                                                                                                                                                                                                                                                                                                                                                                                                                                                                                                                                                                                                                                                                                                                                                                                                                                                                                                                                                                                                  |
| 9  | Physiotherapy Outcomes - Completed at           | 1.3.2   | phoutmodshdat        | Date                                                                                      | date        |                      |                                                                                                                                                                                                                                                                                                                                                                                                                                                                                                                                                                                                                                                                                                                                                                                                                                                                                                                                                                                                                                                                                                                                                                                                                                                                  |
| 9  | Physiotherapy Outcomes - Completed at           | 1.3.3   | phoutmodshyp         | Type                                                                                      | option      |                      | 1 = 10 metres<br>2 = 20 metres                                                                                                                                                                                                                                                                                                                                                                                                                                                                                                                                                                                                                                                                                                                                                                                                                                                                                                                                                                                                                                                                                                                                                                                                                                   |
| 9  | Physiotherapy Outcomes - Completed at           | 1.4     | phoutstep            | Was Step Test Performed?                                                                  | boolean     |                      | 1 = Yes<br>0 = No                                                                                                                                                                                                                                                                                                                                                                                                                                                                                                                                                                                                                                                                                                                                                                                                                                                                                                                                                                                                                                                                                                                                                                                                                                                |
| 9  | Physiotherapy Outcomes - Completed at           | 1.4.1   | phoutstepres         | Result                                                                                    | integer     | min                  |                                                                                                                                                                                                                                                                                                                                                                                                                                                                                                                                                                                                                                                                                                                                                                                                                                                                                                                                                                                                                                                                                                                                                                                                                                                                  |
| 9  | Physiotherapy Outcomes - Completed at           | 1.4.2   | phoutstepdat         | Date                                                                                      | date        |                      |                                                                                                                                                                                                                                                                                                                                                                                                                                                                                                                                                                                                                                                                                                                                                                                                                                                                                                                                                                                                                                                                                                                                                                                                                                                                  |
| 9  | Physiotherapy Outcomes - Completed at           | 1.5     | phoutcpet            | Was CPET Test Performed?                                                                  | boolean     |                      | 1 = Yes<br>0 = No                                                                                                                                                                                                                                                                                                                                                                                                                                                                                                                                                                                                                                                                                                                                                                                                                                                                                                                                                                                                                                                                                                                                                                                                                                                |
| 9  | Physiotherapy Outcomes - Completed at           | 1.5.1   | phoutcpetres         | Result                                                                                    | integer     | VO2 peak % predicted |                                                                                                                                                                                                                                                                                                                                                                                                                                                                                                                                                                                                                                                                                                                                                                                                                                                                                                                                                                                                                                                                                                                                                                                                                                                                  |
| 9  | Physiotherapy Outcomes - Completed at           | 1.5.2   | phoutcpetdat         | Date                                                                                      | date        |                      |                                                                                                                                                                                                                                                                                                                                                                                                                                                                                                                                                                                                                                                                                                                                                                                                                                                                                                                                                                                                                                                                                                                                                                                                                                                                  |
| 9  | Physiotherapy Outcomes - Completed at           | 1.6     | phoutoth             | Any other tests performed?                                                                | boolean     |                      | 1 = Yes<br>0 = No                                                                                                                                                                                                                                                                                                                                                                                                                                                                                                                                                                                                                                                                                                                                                                                                                                                                                                                                                                                                                                                                                                                                                                                                                                                |
| 9  | Physiotherapy Outcomes - Completed at           | 1.6.1.1 | phoutoth1spec        | Specify                                                                                   | string      |                      |                                                                                                                                                                                                                                                                                                                                                                                                                                                                                                                                                                                                                                                                                                                                                                                                                                                                                                                                                                                                                                                                                                                                                                                                                                                                  |
| 9  | Physiotherapy Outcomes - Completed at           | 1.6.1.2 | phoutoth1res         | Result                                                                                    | decimal     |                      |                                                                                                                                                                                                                                                                                                                                                                                                                                                                                                                                                                                                                                                                                                                                                                                                                                                                                                                                                                                                                                                                                                                                                                                                                                                                  |
| 9  | Physiotherapy Outcomes - Completed at           | 1.6.1.3 | phoutoth1dat         | Date                                                                                      | date        |                      |                                                                                                                                                                                                                                                                                                                                                                                                                                                                                                                                                                                                                                                                                                                                                                                                                                                                                                                                                                                                                                                                                                                                                                                                                                                                  |
| 10 | Spirometry Log                                  | 1.1     | fev1datetime         | Date/time of measure                                                                      | datetime    |                      |                                                                                                                                                                                                                                                                                                                                                                                                                                                                                                                                                                                                                                                                                                                                                                                                                                                                                                                                                                                                                                                                                                                                                                                                                                                                  |
| 10 | Spirometry Log                                  | 1.2     | fev1result           | FEV1 result                                                                               | decimal     | litres               |                                                                                                                                                                                                                                                                                                                                                                                                                                                                                                                                                                                                                                                                                                                                                                                                                                                                                                                                                                                                                                                                                                                                                                                                                                                                  |
| 10 | Spirometry Log                                  | 1.3     | fev1height           | Height                                                                                    | decimal     | cm                   |                                                                                                                                                                                                                                                                                                                                                                                                                                                                                                                                                                                                                                                                                                                                                                                                                                                                                                                                                                                                                                                                                                                                                                                                                                                                  |
| 10 | Spirometry Log                                  | 1.4     | fev1location         | Location                                                                                  | option      |                      | 1 = Patient's home<br>2 = Clinichospital<br>9 = Unknown                                                                                                                                                                                                                                                                                                                                                                                                                                                                                                                                                                                                                                                                                                                                                                                                                                                                                                                                                                                                                                                                                                                                                                                                          |
| 10 | Spirometry Log                                  | 1.5     | fev1operator         | Performed by                                                                              | option      |                      | 1 = Patient with their own equipment<br>2 = Clinician/technician with their own equipment<br>9 = Unknown                                                                                                                                                                                                                                                                                                                                                                                                                                                                                                                                                                                                                                                                                                                                                                                                                                                                                                                                                                                                                                                                                                                                                         |
| 10 | Spirometry Log                                  | 1.6     | fev1concerns         | Technical concerns                                                                        | checkbox    |                      | 0 = Yes<br>1 = No                                                                                                                                                                                                                                                                                                                                                                                                                                                                                                                                                                                                                                                                                                                                                                                                                                                                                                                                                                                                                                                                                                                                                                                                                                                |
| 11 | Faecal Clostridium Difficile Testing            | 1.1     | cdadat               | Faecal Sample Date                                                                        | date        |                      |                                                                                                                                                                                                                                                                                                                                                                                                                                                                                                                                                                                                                                                                                                                                                                                                                                                                                                                                                                                                                                                                                                                                                                                                                                                                  |
| 11 | Faecal Clostridium Difficile Testing            | 1.2     | cdres                | Clostridium Difficile (toxin) result                                                      | option      |                      | 1 = Positive<br>2 = Negative<br>3 = Equivocal                                                                                                                                                                                                                                                                                                                                                                                                                                                                                                                                                                                                                                                                                                                                                                                                                                                                                                                                                                                                                                                                                                                                                                                                                    |
| 11 | Faecal Clostridium Difficile Testing            | 1.2.1   | cdsymp               | Is the participant symptomatic (i.e. looser than normal stools)?                          | boolean     |                      | 1 = Yes<br>0 = No                                                                                                                                                                                                                                                                                                                                                                                                                                                                                                                                                                                                                                                                                                                                                                                                                                                                                                                                                                                                                                                                                                                                                                                                                                                |
| 11 | Faecal Clostridium Difficile Testing            | 1.2.2   | cdprevpos            | Has there been a previous POSITIVE Clostridium difficile result in the preceding 2 years? | boolean     |                      | 1 = Yes<br>0 = No                                                                                                                                                                                                                                                                                                                                                                                                                                                                                                                                                                                                                                                                                                                                                                                                                                                                                                                                                                                                                                                                                                                                                                                                                                                |
| 11 | Faecal Clostridium Difficile Testing            | 1.2.2.1 | cdprevposdat         | Sample date for the previous POSITIVE faecal sample                                       | date        |                      |                                                                                                                                                                                                                                                                                                                                                                                                                                                                                                                                                                                                                                                                                                                                                                                                                                                                                                                                                                                                                                                                                                                                                                                                                                                                  |
| 12 | Antibiotic Reaction Events                      | 1.1     | abrax                | Name of Antibiotic                                                                        | option      |                      | 1 = Amoxicillin<br>2 = Amoxicillin clavulanate<br>4 = Amikacin<br>5 = Amphotericin B<br>6 = Ampicillin<br>7 = Azithromycin<br>8 = Aztreonam<br>9 = Caspofungin<br>10 = Cefaclor<br>11 = Cefazolin<br>12 = Cefepime<br>13 = Cefotaxime<br>14 = Ceftriaxone<br>15 = Ceftriaxime<br>16 = Cefazolin<br>17 = Cefepime<br>18 = Chloramphenicol<br>19 = Ciprofloxacin<br>20 = Clarithromycin<br>21 = Clindamycin<br>22 = Colistin<br>23 = Cotrimoxazole (Trimethoprim and sulfamethoxazole)<br>24 = Daptomycin<br>25 = Diclexacin<br>26 = Doxycycline<br>27 = Ertapenem<br>28 = Erythromycin<br>29 = Fluoxacin<br>30 = Fluconazole<br>31 = Fosfomicin<br>32 = Fusidic acid<br>33 = Gentamicin<br>34 = Impenem<br>35 = Itraconazole<br>36 = Ketoconazole<br>37 = Linezolid<br>38 = Meropenem<br>39 = Metronidazole<br>40 = Minocycline<br>41 = Moxifloxacin<br>42 = Mupirocin<br>43 = Nitrofurantoin<br>44 = Norfloxacin<br>45 = Ofloxacin<br>46 = Penicillin-benzylpenicillin<br>47 = Piperacillin tazobactam (Tazocin)<br>48 = Posaconazole<br>49 = Ritampicin<br>50 = Telicoplanin<br>51 = Tetracycline<br>52 = Ticarcillin clavulanate (Timentin)<br>53 = Tigecycline<br>54 = Tobramycin<br>55 = Trimethoprim<br>56 = Vancomycin<br>57 = Voriconazole<br>999 = Other |
| 12 | Antibiotic Reaction Events                      | 1.1a    | abraxoth             | Other, Please specify                                                                     | string      |                      |                                                                                                                                                                                                                                                                                                                                                                                                                                                                                                                                                                                                                                                                                                                                                                                                                                                                                                                                                                                                                                                                                                                                                                                                                                                                  |
| 12 | Antibiotic Reaction Events                      | 1.2     | abrecall             | Patient recall of potential reaction                                                      | option      |                      | 1 = Patient can describe reaction<br>2 = Patient cannot describe reaction                                                                                                                                                                                                                                                                                                                                                                                                                                                                                                                                                                                                                                                                                                                                                                                                                                                                                                                                                                                                                                                                                                                                                                                        |
| 12 | Antibiotic Reaction Events                      | 1.3     | abrsdat              | Start date of antibiotic                                                                  | date        |                      |                                                                                                                                                                                                                                                                                                                                                                                                                                                                                                                                                                                                                                                                                                                                                                                                                                                                                                                                                                                                                                                                                                                                                                                                                                                                  |
| 12 | Antibiotic Reaction Events                      | 1.3.a   | abrsdatunk           | Unknown                                                                                   | checkbox    |                      | 0 = Yes<br>1 = No                                                                                                                                                                                                                                                                                                                                                                                                                                                                                                                                                                                                                                                                                                                                                                                                                                                                                                                                                                                                                                                                                                                                                                                                                                                |
| 12 | Antibiotic Reaction Events                      | 1.5     | abrroute             | Route of administration                                                                   | option      |                      | 1 = Inhalation<br>2 = Intramuscular<br>3 = Intravenous<br>4 = Oral (or gastrostomy)<br>5 = Subcutaneous<br>6 = Topical<br>7 = Other<br>99 = Not known                                                                                                                                                                                                                                                                                                                                                                                                                                                                                                                                                                                                                                                                                                                                                                                                                                                                                                                                                                                                                                                                                                            |
| 12 | Antibiotic Reaction Events                      | 2.1a    | abrprssick           | felt sick                                                                                 | checkbox    |                      | 0 = Yes<br>1 = No                                                                                                                                                                                                                                                                                                                                                                                                                                                                                                                                                                                                                                                                                                                                                                                                                                                                                                                                                                                                                                                                                                                                                                                                                                                |
| 12 | Antibiotic Reaction Events                      | 2.1b    | abrprstchtong        | itchy tongue                                                                              | checkbox    |                      | 0 = Yes<br>1 = No                                                                                                                                                                                                                                                                                                                                                                                                                                                                                                                                                                                                                                                                                                                                                                                                                                                                                                                                                                                                                                                                                                                                                                                                                                                |
| 12 | Antibiotic Reaction Events                      | 2.1c    | abrprstcheyes        | itchy eyes                                                                                | checkbox    |                      | 0 = Yes<br>1 = No                                                                                                                                                                                                                                                                                                                                                                                                                                                                                                                                                                                                                                                                                                                                                                                                                                                                                                                                                                                                                                                                                                                                                                                                                                                |
| 12 | Antibiotic Reaction Events                      | 2.1d    | abrprstchtthroat     | itchy throat                                                                              | checkbox    |                      | 0 = Yes<br>1 = No                                                                                                                                                                                                                                                                                                                                                                                                                                                                                                                                                                                                                                                                                                                                                                                                                                                                                                                                                                                                                                                                                                                                                                                                                                                |
| 12 | Antibiotic Reaction Events                      | 2.1e    | abrprstchall         | itching all over                                                                          | checkbox    |                      | 0 = Yes<br>1 = No                                                                                                                                                                                                                                                                                                                                                                                                                                                                                                                                                                                                                                                                                                                                                                                                                                                                                                                                                                                                                                                                                                                                                                                                                                                |
| 12 | Antibiotic Reaction Events                      | 2.1f    | abrprsthrsores       | sores in throat                                                                           | checkbox    |                      | 0 = Yes<br>1 = No                                                                                                                                                                                                                                                                                                                                                                                                                                                                                                                                                                                                                                                                                                                                                                                                                                                                                                                                                                                                                                                                                                                                                                                                                                                |
| 12 | Antibiotic Reaction Events                      | 2.1g    | abrprssnz            | sneezing                                                                                  | checkbox    |                      | 0 = Yes<br>1 = No                                                                                                                                                                                                                                                                                                                                                                                                                                                                                                                                                                                                                                                                                                                                                                                                                                                                                                                                                                                                                                                                                                                                                                                                                                                |
| 12 | Antibiotic Reaction Events                      | 2.1h    | abrprscough          | cough                                                                                     | checkbox    |                      | 0 = Yes<br>1 = No                                                                                                                                                                                                                                                                                                                                                                                                                                                                                                                                                                                                                                                                                                                                                                                                                                                                                                                                                                                                                                                                                                                                                                                                                                                |
| 12 | Antibiotic Reaction Events                      | 2.1i    | abrprsbreath         | short of breath                                                                           | checkbox    |                      | 0 = Yes<br>1 = No                                                                                                                                                                                                                                                                                                                                                                                                                                                                                                                                                                                                                                                                                                                                                                                                                                                                                                                                                                                                                                                                                                                                                                                                                                                |
| 12 | Antibiotic Reaction Events                      | 2.1j    | abrprseyesw          | swelling around eyes                                                                      | checkbox    |                      | 0 = Yes<br>1 = No                                                                                                                                                                                                                                                                                                                                                                                                                                                                                                                                                                                                                                                                                                                                                                                                                                                                                                                                                                                                                                                                                                                                                                                                                                                |
| 12 | Antibiotic Reaction Events                      | 2.1k    | abrprscnf            | confused                                                                                  | checkbox    |                      | 0 = Yes<br>1 = No                                                                                                                                                                                                                                                                                                                                                                                                                                                                                                                                                                                                                                                                                                                                                                                                                                                                                                                                                                                                                                                                                                                                                                                                                                                |
| 12 | Antibiotic Reaction Events                      | 2.1m    | abrprshead           | headache                                                                                  | checkbox    |                      | 0 = Yes<br>1 = No                                                                                                                                                                                                                                                                                                                                                                                                                                                                                                                                                                                                                                                                                                                                                                                                                                                                                                                                                                                                                                                                                                                                                                                                                                                |
| 12 | Antibiotic Reaction Events                      | 2.1n    | abrprsdizz           | dizziness                                                                                 | checkbox    |                      | 0 = Yes<br>1 = No                                                                                                                                                                                                                                                                                                                                                                                                                                                                                                                                                                                                                                                                                                                                                                                                                                                                                                                                                                                                                                                                                                                                                                                                                                                |
| 12 | Antibiotic Reaction Events                      | 2.1p    | abrprsmcldpn         | muscle pain                                                                               | checkbox    |                      | 0 = Yes<br>1 = No                                                                                                                                                                                                                                                                                                                                                                                                                                                                                                                                                                                                                                                                                                                                                                                                                                                                                                                                                                                                                                                                                                                                                                                                                                                |
| 12 | Antibiotic Reaction Events                      | 2.1q    | abrprsfld            | afraid                                                                                    | checkbox    |                      | 0 = Yes<br>1 = No                                                                                                                                                                                                                                                                                                                                                                                                                                                                                                                                                                                                                                                                                                                                                                                                                                                                                                                                                                                                                                                                                                                                                                                                                                                |
| 12 | Antibiotic Reaction Events                      | 2.1r    | abrprssweat          | sweating                                                                                  | checkbox    |                      | 0 = Yes<br>1 = No                                                                                                                                                                                                                                                                                                                                                                                                                                                                                                                                                                                                                                                                                                                                                                                                                                                                                                                                                                                                                                                                                                                                                                                                                                                |
| 12 | Antibiotic Reaction Events                      | 2.1t    | abrprsfaint          | faint                                                                                     | checkbox    |                      | 0 = Yes<br>1 = No                                                                                                                                                                                                                                                                                                                                                                                                                                                                                                                                                                                                                                                                                                                                                                                                                                                                                                                                                                                                                                                                                                                                                                                                                                                |
| 12 | Antibiotic Reaction Events                      | 2.1u    | abrprsoth            | other                                                                                     | checkbox    |                      | 0 = Yes<br>1 = No                                                                                                                                                                                                                                                                                                                                                                                                                                                                                                                                                                                                                                                                                                                                                                                                                                                                                                                                                                                                                                                                                                                                                                                                                                                |
| 12 | Antibiotic Reaction Events                      | 2.2     | abrprsothspec        | Other symptoms described by the patient                                                   | text        |                      |                                                                                                                                                                                                                                                                                                                                                                                                                                                                                                                                                                                                                                                                                                                                                                                                                                                                                                                                                                                                                                                                                                                                                                                                                                                                  |
| 12 | Antibiotic Reaction Events                      | 3.1a    | abrashnon            | Non-specific (eg macular/maculopapular)                                                   | checkbox    |                      | 0 = Yes<br>1 = No                                                                                                                                                                                                                                                                                                                                                                                                                                                                                                                                                                                                                                                                                                                                                                                                                                                                                                                                                                                                                                                                                                                                                                                                                                                |
| 12 | Antibiotic Reaction Events                      | 3.1b    | abrashurti           | Urticaria                                                                                 | checkbox    |                      | 0 = Yes<br>1 = No                                                                                                                                                                                                                                                                                                                                                                                                                                                                                                                                                                                                                                                                                                                                                                                                                                                                                                                                                                                                                                                                                                                                                                                                                                                |
| 12 | Antibiotic Reaction Events                      | 3.1c    | abrashblst           | Skin blistering                                                                           | checkbox    |                      | 0 = Yes<br>1 = No                                                                                                                                                                                                                                                                                                                                                                                                                                                                                                                                                                                                                                                                                                                                                                                                                                                                                                                                                                                                                                                                                                                                                                                                                                                |
| 12 | Antibiotic Reaction Events                      | 3.1d    | abrashmucos          | Mucosal involvement                                                                       | checkbox    |                      | 0 = Yes<br>1 = No                                                                                                                                                                                                                                                                                                                                                                                                                                                                                                                                                                                                                                                                                                                                                                                                                                                                                                                                                                                                                                                                                                                                                                                                                                                |

|    |                            |          |                  |                                                                                                      |         |                     |  |                                                                                                                |
|----|----------------------------|----------|------------------|------------------------------------------------------------------------------------------------------|---------|---------------------|--|----------------------------------------------------------------------------------------------------------------|
| 12 | Antibiotic Reaction Events | 3.1e     | abrasheryth      | Erythema                                                                                             |         | checkbox            |  | 0 = Yes<br>0 = No                                                                                              |
| 12 | Antibiotic Reaction Events | 3.1f     | abrashitch       | Itch (without rash)                                                                                  |         | checkbox            |  | 0 = Yes<br>0 = No                                                                                              |
| 12 | Antibiotic Reaction Events | 3.1g     | abrashnone       | None                                                                                                 |         | checkbox            |  | 0 = Yes<br>0 = No                                                                                              |
| 12 | Antibiotic Reaction Events | 3.2a     | abredemaperiorb  | Peri-orbital                                                                                         |         | checkbox            |  | 0 = Yes<br>0 = No                                                                                              |
| 12 | Antibiotic Reaction Events | 3.2b     | abredemafacial   | Facial                                                                                               |         | checkbox            |  | 0 = Yes<br>0 = No                                                                                              |
| 12 | Antibiotic Reaction Events | 3.2c     | abredemalip      | Lip                                                                                                  |         | checkbox            |  | 0 = Yes<br>0 = No                                                                                              |
| 12 | Antibiotic Reaction Events | 3.2d     | abredemaperi     | Peripheral                                                                                           |         | checkbox            |  | 0 = Yes<br>0 = No                                                                                              |
| 12 | Antibiotic Reaction Events | 3.2e     | abredemanosp     | Site not specified                                                                                   |         | checkbox            |  | 0 = Yes<br>0 = No                                                                                              |
| 12 | Antibiotic Reaction Events | 3.2f     | abredemanone     | None                                                                                                 |         | checkbox            |  | 0 = Yes<br>0 = No                                                                                              |
| 12 | Antibiotic Reaction Events | 3.3a     | abrespupstri     | Stridor, hoarse/loss of voice                                                                        |         | checkbox            |  | 0 = Yes<br>0 = No                                                                                              |
| 12 | Antibiotic Reaction Events | 3.3b     | abrespupthrt     | Tight throat                                                                                         |         | checkbox            |  | 0 = Yes<br>0 = No                                                                                              |
| 12 | Antibiotic Reaction Events | 3.3c     | abrespuptong     | Tongue swelling                                                                                      |         | checkbox            |  | 0 = Yes<br>0 = No                                                                                              |
| 12 | Antibiotic Reaction Events | 3.3d     | abrespupdrool    | Drooling                                                                                             |         | checkbox            |  | 0 = Yes<br>0 = No                                                                                              |
| 12 | Antibiotic Reaction Events | 3.3e     | abrespupnone     | None                                                                                                 |         | checkbox            |  | 0 = Yes<br>0 = No                                                                                              |
| 12 | Antibiotic Reaction Events | 3.4a     | abrespupwheeze   | Wheeze                                                                                               |         | checkbox            |  | 0 = Yes<br>0 = No                                                                                              |
| 12 | Antibiotic Reaction Events | 3.4b     | abrespupcough    | Persistent cough                                                                                     |         | checkbox            |  | 0 = Yes<br>0 = No                                                                                              |
| 12 | Antibiotic Reaction Events | 3.4c     | abrespuphyp      | Hypoxia                                                                                              |         | checkbox            |  | 0 = Yes<br>0 = No                                                                                              |
| 12 | Antibiotic Reaction Events | 3.4d     | abrespupnone     | None                                                                                                 |         | checkbox            |  | 0 = Yes<br>0 = No                                                                                              |
| 12 | Antibiotic Reaction Events | 3.5a     | abrcardi tach    | Tachycardia                                                                                          |         | checkbox            |  | 0 = Yes<br>0 = No                                                                                              |
| 12 | Antibiotic Reaction Events | 3.5b     | abrcardi hypot   | Hypotension                                                                                          |         | checkbox            |  | 0 = Yes<br>0 = No                                                                                              |
| 12 | Antibiotic Reaction Events | 3.5c     | abrcardi pale    | Pale/floppy                                                                                          |         | checkbox            |  | 0 = Yes<br>0 = No                                                                                              |
| 12 | Antibiotic Reaction Events | 3.5d     | abrcardi consc   | Loss of consciousness                                                                                |         | checkbox            |  | 0 = Yes<br>0 = No                                                                                              |
| 12 | Antibiotic Reaction Events | 3.5e     | abrcardi none    | None                                                                                                 |         | checkbox            |  | 0 = Yes<br>0 = No                                                                                              |
| 12 | Antibiotic Reaction Events | 3.6a     | abrgastro dia    | Diarrhoea                                                                                            |         | checkbox            |  | 0 = Yes<br>0 = No                                                                                              |
| 12 | Antibiotic Reaction Events | 3.6b     | abrgastro vom    | Vomiting                                                                                             |         | checkbox            |  | 0 = Yes<br>0 = No                                                                                              |
| 12 | Antibiotic Reaction Events | 3.6c     | abrgastro abdo   | Abdominal pain                                                                                       |         | checkbox            |  | 0 = Yes<br>0 = No                                                                                              |
| 12 | Antibiotic Reaction Events | 3.6d     | abrgastro none   | None                                                                                                 |         | checkbox            |  | 0 = Yes<br>0 = No                                                                                              |
| 12 | Antibiotic Reaction Events | 3.7a     | abrsys fever     | Fever                                                                                                |         | checkbox            |  | 0 = Yes<br>0 = No                                                                                              |
| 12 | Antibiotic Reaction Events | 3.7b     | abrsys none      | None                                                                                                 |         | checkbox            |  | 0 = Yes<br>0 = No                                                                                              |
| 12 | Antibiotic Reaction Events | 3.8      | abrsymoth        | Any additional information regarding reaction                                                        |         | text                |  |                                                                                                                |
| 12 | Antibiotic Reaction Events | 4.1      | abrint           | Interval between last dose and suspected reaction                                                    |         | option              |  | 1 = < 1 hour<br>2 = 1-6 hours<br>3 = 6-24 hours<br>4 = 24-48 hours<br>5 = > 48 hours<br>9 = Unknown            |
| 12 | Antibiotic Reaction Events | 4.2      | abrday           | On which day of the course did the reaction occur?                                                   |         | option              |  | 1 = Day 1<br>2 = Day 2<br>3 = Day 3-5<br>4 = Day 6-7<br>5 = Beyond Day 7<br>6 = Post completion<br>9 = Unknown |
| 12 | Antibiotic Reaction Events | 4.3      | abrdose          | After which number dose since the commencement of this course of antibiotics did the reaction occur? |         | integer             |  |                                                                                                                |
| 12 | Antibiotic Reaction Events | 4.3a     | abrdoseunk       | Unknown                                                                                              |         | checkbox            |  | 0 = Yes<br>0 = No                                                                                              |
| 12 | Antibiotic Reaction Events | 4.4      | abrpvex          | Any previous exposure to this antibiotic?                                                            |         | option              |  | 1 = Yes<br>0 = No<br>-1 = Unknown                                                                              |
| 12 | Antibiotic Reaction Events | 4.5      | abrpvclas        | Any previous exposure to the same class of antibiotic?                                               |         | option              |  | 1 = Yes<br>0 = No<br>-1 = Unknown                                                                              |
| 12 | Antibiotic Reaction Events | 4.5.1    | abrpvclaspec     | Specify antibiotic                                                                                   |         | string              |  |                                                                                                                |
| 12 | Antibiotic Reaction Events | 4.6      | abrcas           | Was the antibiotic ceased as a result of this reaction?                                              |         | option              |  | 1 = Yes<br>0 = No<br>-1 = Unknown                                                                              |
| 12 | Antibiotic Reaction Events | 4.7      | abrsympers       | For how long were the symptoms persisting?                                                           |         | option              |  | 1 = Hours<br>2 = Days<br>3 = Unknown                                                                           |
| 12 | Antibiotic Reaction Events | 4.7.1    | abrpershrs spec  | Specify the number of hours                                                                          | decimal | hours               |  |                                                                                                                |
| 12 | Antibiotic Reaction Events | 4.7.2    | abrpersdys spec  | Specify the number of days                                                                           | integer | days                |  |                                                                                                                |
| 12 | Antibiotic Reaction Events | 4.8      | abrtt            | Was any treatment given for the symptoms?                                                            |         | option              |  | 1 = Yes<br>0 = No<br>-1 = Unknown                                                                              |
| 12 | Antibiotic Reaction Events | 4.8.1a   | abrtt ahiv       | Antihistamines IV                                                                                    |         | checkbox            |  | 0 = Yes<br>0 = No                                                                                              |
| 12 | Antibiotic Reaction Events | 4.8.1b   | abrtt ahpo       | Antihistamines PO                                                                                    |         | checkbox            |  | 0 = Yes<br>0 = No                                                                                              |
| 12 | Antibiotic Reaction Events | 4.8.1c   | abrtt csiv       | Corticosteroids IV                                                                                   |         | checkbox            |  | 0 = Yes<br>0 = No                                                                                              |
| 12 | Antibiotic Reaction Events | 4.8.1d   | abrtt cs po      | Corticosteroids PO                                                                                   |         | checkbox            |  | 0 = Yes<br>0 = No                                                                                              |
| 12 | Antibiotic Reaction Events | 4.8.1e   | abrtt csto       | Corticosteroids topically                                                                            |         | checkbox            |  | 0 = Yes<br>0 = No                                                                                              |
| 12 | Antibiotic Reaction Events | 4.8.1f   | abrtt adiv       | Adrenaline IV                                                                                        |         | checkbox            |  | 0 = Yes<br>0 = No                                                                                              |
| 12 | Antibiotic Reaction Events | 4.8.1g   | abrtt adim       | Adrenaline IM (e.g. EpiPen)                                                                          |         | checkbox            |  | 0 = Yes<br>0 = No                                                                                              |
| 12 | Antibiotic Reaction Events | 4.8.1h   | abrtt isi        | Salbutamol inhalation (e.g. ventolin)                                                                |         | checkbox            |  | 0 = Yes<br>0 = No                                                                                              |
| 12 | Antibiotic Reaction Events | 4.8.1i   | abrtt oth        | Other treatment                                                                                      |         | checkbox            |  | 0 = Yes<br>0 = No                                                                                              |
| 12 | Antibiotic Reaction Events | 4.8.1i.1 | abrtt oth spec   | Specify                                                                                              | string  |                     |  |                                                                                                                |
| 12 | Antibiotic Reaction Events | 4.9      | abrmcd           | Was medical attention sought for the reaction?                                                       |         | boolean             |  | 1 = Yes<br>0 = No                                                                                              |
| 12 | Antibiotic Reaction Events | 4.9.1a   | abrmcdgp         | GP                                                                                                   |         | checkbox            |  | 0 = Yes<br>0 = No                                                                                              |
| 12 | Antibiotic Reaction Events | 4.9.1b   | abrmcdhd         | Health Direct                                                                                        |         | checkbox            |  | 0 = Yes<br>0 = No                                                                                              |
| 12 | Antibiotic Reaction Events | 4.9.1c   | abrmcded         | ED                                                                                                   |         | checkbox            |  | 0 = Yes<br>0 = No                                                                                              |
| 12 | Antibiotic Reaction Events | 4.9.1d   | abrmcdinp        | Inpatient at the time                                                                                |         | checkbox            |  | 0 = Yes<br>0 = No                                                                                              |
| 12 | Antibiotic Reaction Events | 4.9.1e   | abrmcdcp         | Community pharmacy                                                                                   |         | checkbox            |  | 0 = Yes<br>0 = No                                                                                              |
| 12 | Antibiotic Reaction Events | 4.9.1f   | abrmcdoth        | Other                                                                                                |         | checkbox            |  | 0 = Yes<br>0 = No                                                                                              |
| 12 | Antibiotic Reaction Events | 4.9.1g   | abrmcdoth spec   | Specify other type of medical attention                                                              |         | string              |  |                                                                                                                |
| 12 | Antibiotic Reaction Events | 4.10     | abrsymmodrug     | Have similar symptoms been observed without intake of suspicious drug(s)?                            |         | option              |  | 1 = Yes<br>0 = No<br>-1 = Unknown                                                                              |
| 12 | Antibiotic Reaction Events | 4.10.1   | abrsymcause      | Please specify                                                                                       |         | string              |  |                                                                                                                |
| 12 | Antibiotic Reaction Events | 4.11     | abrothdrug       | Was the patient taking any other drugs at the time the reaction occurred?                            |         | option              |  | 1 = Yes<br>0 = No<br>-1 = Unknown                                                                              |
| 12 | Antibiotic Reaction Events | 4.12     | abrothab         | Does this reaction create a contraindication to any of the following antibiotics?                    |         | boolean             |  | 1 = Yes<br>0 = No                                                                                              |
| 12 | Antibiotic Reaction Events | 5.2      | abrwcc           | White cell count                                                                                     | decimal | x10 <sup>9</sup> /L |  |                                                                                                                |
| 12 | Antibiotic Reaction Events | 5.2a     | abrwccna         | N/A                                                                                                  |         | checkbox            |  | 0 = Yes<br>0 = No                                                                                              |
| 12 | Antibiotic Reaction Events | 5.3      | abreosinophils   | Eosinophils count                                                                                    | decimal | x10 <sup>9</sup> /L |  |                                                                                                                |
| 12 | Antibiotic Reaction Events | 5.3a     | abreosinophilsna | N/A                                                                                                  |         | checkbox            |  | 0 = Yes<br>0 = No                                                                                              |
| 12 | Antibiotic Reaction Events | 5.4      | abrneutrophils   | Neutrophils count                                                                                    | decimal | x10 <sup>9</sup> /L |  |                                                                                                                |
| 12 | Antibiotic Reaction Events | 5.4a     | abrneutrophilsna | N/A                                                                                                  |         | checkbox            |  | 0 = Yes<br>0 = No                                                                                              |
| 12 | Antibiotic Reaction Events | 5.5      | abrhgb           | Haemoglobin                                                                                          | decimal | g/dL                |  |                                                                                                                |
| 12 | Antibiotic Reaction Events | 5.5a     | abrhgbna         | N/A                                                                                                  |         | checkbox            |  | 0 = Yes<br>0 = No                                                                                              |
| 12 | Antibiotic Reaction Events | 5.6      | abrpit           | Platelets                                                                                            | decimal | x10 <sup>9</sup> /L |  |                                                                                                                |
| 12 | Antibiotic Reaction Events | 5.6a     | abrpitna         | N/A                                                                                                  |         | checkbox            |  | 0 = Yes<br>0 = No                                                                                              |
| 12 | Antibiotic Reaction Events | 5.7      | abrait           | ALT                                                                                                  | decimal | U/L                 |  |                                                                                                                |
| 12 | Antibiotic Reaction Events | 5.7a     | abraitna         | N/A                                                                                                  |         | checkbox            |  | 0 = Yes<br>0 = No                                                                                              |
| 12 | Antibiotic Reaction Events | 5.8      | abrast           | AST                                                                                                  | decimal | U/L                 |  |                                                                                                                |
| 12 | Antibiotic Reaction Events | 5.8a     | abrastna         | N/A                                                                                                  |         | checkbox            |  | 0 = Yes<br>0 = No                                                                                              |
| 12 | Antibiotic Reaction Events | 5.9      | abrtbr           | Total bilirubin                                                                                      | decimal | µmol/L              |  |                                                                                                                |
| 12 | Antibiotic Reaction Events | 5.9a     | abrtbrna         | N/A                                                                                                  |         | checkbox            |  | 0 = Yes<br>0 = No                                                                                              |
| 12 | Antibiotic Reaction Events | 5.10     | abrurea          | Urea                                                                                                 | decimal | mmol/L              |  |                                                                                                                |
| 12 | Antibiotic Reaction Events | 5.10a    | abrureana        | N/A                                                                                                  |         | checkbox            |  | 0 = Yes<br>0 = No                                                                                              |
| 12 | Antibiotic Reaction Events | 5.11     | abrcreat         | Creatinine                                                                                           | decimal | µmol/L              |  |                                                                                                                |
| 12 | Antibiotic Reaction Events | 5.11a    | abrcreatna       | N/A                                                                                                  |         | checkbox            |  | 0 = Yes<br>0 = No                                                                                              |
| 12 | Antibiotic Reaction Events | 5.12     | abrcrp           | CRP                                                                                                  | decimal | mg/L                |  |                                                                                                                |
| 12 | Antibiotic Reaction Events | 5.12a    | abrcrpnna        | N/A                                                                                                  |         | checkbox            |  | 0 = Yes<br>0 = No                                                                                              |
| 12 | Antibiotic Reaction Events | 5.13     | abrtyp           | Trypase                                                                                              | decimal | U/mL                |  |                                                                                                                |
| 12 | Antibiotic Reaction Events | 5.13a    | abrtypna         | N/A                                                                                                  |         | checkbox            |  | 0 = Yes<br>0 = No                                                                                              |

|      |                               |     |                            |                                                                                                                        |  |          |                                                                                                                                                                                                                              |
|------|-------------------------------|-----|----------------------------|------------------------------------------------------------------------------------------------------------------------|--|----------|------------------------------------------------------------------------------------------------------------------------------------------------------------------------------------------------------------------------------|
| 13   | Co-enrolment in Other Studies | 1.1 | coenrolment_name           | Name of other study                                                                                                    |  | string   |                                                                                                                                                                                                                              |
| 13   | Co-enrolment in Other Studies | 1.2 | coenrolment_number         | Participant number (ID)                                                                                                |  | string   |                                                                                                                                                                                                                              |
| 13   | Co-enrolment in Other Studies | 1.3 | coenrolment_drug           | Study involve taking specified medications?                                                                            |  | boolean  | 1 = Yes<br>0 = No                                                                                                                                                                                                            |
| 13   | Co-enrolment in Other Studies | 1.4 | coenrolment_start_date     | Date of enrolment                                                                                                      |  | date     |                                                                                                                                                                                                                              |
| 13   | Co-enrolment in Other Studies | 1.5 | coenrolment_end_date       | Date of completion                                                                                                     |  | date     |                                                                                                                                                                                                                              |
| 14.1 | CFQR - Parent/Caregiver       |     | cfqr_parent_carer_datetime | Completion date/time                                                                                                   |  | datetime |                                                                                                                                                                                                                              |
| 14.1 | CFQR - Parent/Caregiver       | 1   | cfqr_parent_carer_q1       | Performing vigorous activities such as running or playing sports                                                       |  | option   | 1 = A lot of difficulty<br>2 = Some difficulty<br>3 = A little difficulty<br>4 = No difficulty                                                                                                                               |
| 14.1 | CFQR - Parent/Caregiver       | 2   | cfqr_parent_carer_q2       | Walking as fast as others                                                                                              |  | option   | 1 = A lot of difficulty<br>2 = Some difficulty<br>3 = A little difficulty<br>4 = No difficulty                                                                                                                               |
| 14.1 | CFQR - Parent/Caregiver       | 3   | cfqr_parent_carer_q3       | Climbing stairs as fast as others                                                                                      |  | option   | 1 = A lot of difficulty<br>2 = Some difficulty<br>3 = A little difficulty<br>4 = No difficulty                                                                                                                               |
| 14.1 | CFQR - Parent/Caregiver       | 4   | cfqr_parent_carer_q4       | Carrying or lifting heavy objects such as books, school bag, or backpack                                               |  | option   | 1 = A lot of difficulty<br>2 = Some difficulty<br>3 = A little difficulty<br>4 = No difficulty                                                                                                                               |
| 14.1 | CFQR - Parent/Caregiver       | 5   | cfqr_parent_carer_q5       | Climbing several flights of stairs                                                                                     |  | option   | 1 = A lot of difficulty<br>2 = Some difficulty<br>3 = A little difficulty<br>4 = No difficulty                                                                                                                               |
| 14.1 | CFQR - Parent/Caregiver       | 6   | cfqr_parent_carer_q6       | Seemed happy                                                                                                           |  | option   | 4 = Always<br>3 = Often<br>2 = Sometimes<br>1 = Never                                                                                                                                                                        |
| 14.1 | CFQR - Parent/Caregiver       | 7   | cfqr_parent_carer_q7       | Seemed worried                                                                                                         |  | option   | 1 = Always<br>2 = Often<br>3 = Sometimes<br>4 = Never                                                                                                                                                                        |
| 14.1 | CFQR - Parent/Caregiver       | 8   | cfqr_parent_carer_q8       | Seemed tired                                                                                                           |  | option   | 1 = Always<br>2 = Often<br>3 = Sometimes<br>4 = Never                                                                                                                                                                        |
| 14.1 | CFQR - Parent/Caregiver       | 9   | cfqr_parent_carer_q9       | Seemed short-tempered                                                                                                  |  | option   | 1 = Always<br>2 = Often<br>3 = Sometimes<br>4 = Never                                                                                                                                                                        |
| 14.1 | CFQR - Parent/Caregiver       | 10  | cfqr_parent_carer_q10      | Seemed well                                                                                                            |  | option   | 4 = Always<br>3 = Often<br>2 = Sometimes<br>1 = Never                                                                                                                                                                        |
| 14.1 | CFQR - Parent/Caregiver       | 11  | cfqr_parent_carer_q11      | Seemed grouchy                                                                                                         |  | option   | 1 = Always<br>2 = Often<br>3 = Sometimes<br>4 = Never                                                                                                                                                                        |
| 14.1 | CFQR - Parent/Caregiver       | 12  | cfqr_parent_carer_q12      | Seemed full of energy                                                                                                  |  | option   | 4 = Always<br>3 = Often<br>2 = Sometimes<br>1 = Never                                                                                                                                                                        |
| 14.1 | CFQR - Parent/Caregiver       | 13  | cfqr_parent_carer_q13      | Was absent or late for school or other activities because of his/her illness or treatments                             |  | option   | 1 = Always<br>2 = Often<br>3 = Sometimes<br>4 = Never                                                                                                                                                                        |
| 14.1 | CFQR - Parent/Caregiver       | 14  | cfqr_parent_carer_q14      | The extent to which your child participated in sports and other physical activities, such as P.E. (physical education) |  | option   | 1 = Has not participated in physical activities<br>2 = Has participated less than usual in sports<br>3 = Has participated as much as usual but with some<br>4 = Has been able to participate in physical activities          |
| 14.1 | CFQR - Parent/Caregiver       | 15  | cfqr_parent_carer_q15      | The extent to which your child has difficulty walking                                                                  |  | option   | 4 = He or she can walk a long time without getting tired<br>3 = He or she can walk a long time but gets tired<br>2 = He or she cannot walk a long time, because he or<br>1 = He or she avoids walking whenever possible, bec |
| 14.1 | CFQR - Parent/Caregiver       | 16  | cfqr_parent_carer_q16      | My child has trouble recovering after physical effort                                                                  |  | option   | 1 = Very true<br>2 = Somewhat true<br>3 = Somewhat false<br>4 = Very false                                                                                                                                                   |
| 14.1 | CFQR - Parent/Caregiver       | 17  | cfqr_parent_carer_q17      | Mealtimes are a struggle                                                                                               |  | option   | 1 = Very true<br>2 = Somewhat true<br>3 = Somewhat false<br>4 = Very false                                                                                                                                                   |
| 14.1 | CFQR - Parent/Caregiver       | 18  | cfqr_parent_carer_q18      | My child's treatments get in the way of his/her activities                                                             |  | option   | 1 = Very true<br>2 = Somewhat true<br>3 = Somewhat false<br>4 = Very false                                                                                                                                                   |
| 14.1 | CFQR - Parent/Caregiver       | 19  | cfqr_parent_carer_q19      | My child feels small compared to other kids the same age                                                               |  | option   | 1 = Very true<br>2 = Somewhat true<br>3 = Somewhat false<br>4 = Very false                                                                                                                                                   |
| 14.1 | CFQR - Parent/Caregiver       | 20  | cfqr_parent_carer_q20      | My child feels physically different from other kids the same age                                                       |  | option   | 1 = Very true<br>2 = Somewhat true<br>3 = Somewhat false<br>4 = Very false                                                                                                                                                   |
| 14.1 | CFQR - Parent/Caregiver       | 21  | cfqr_parent_carer_q21      | My child thinks that he/she is too thin                                                                                |  | option   | 1 = Very true<br>2 = Somewhat true<br>3 = Somewhat false<br>4 = Very false                                                                                                                                                   |
| 14.1 | CFQR - Parent/Caregiver       | 22  | cfqr_parent_carer_q22      | My child feels healthy                                                                                                 |  | option   | 4 = Very true<br>3 = Somewhat true<br>2 = Somewhat false<br>1 = Very false                                                                                                                                                   |
| 14.1 | CFQR - Parent/Caregiver       | 23  | cfqr_parent_carer_q23      | My child tends to be withdrawn                                                                                         |  | option   | 1 = Very true<br>2 = Somewhat true<br>3 = Somewhat false<br>4 = Very false                                                                                                                                                   |
| 14.1 | CFQR - Parent/Caregiver       | 24  | cfqr_parent_carer_q24      | My child leads a normal life                                                                                           |  | option   | 4 = Very true<br>3 = Somewhat true<br>2 = Somewhat false<br>1 = Very false                                                                                                                                                   |
| 14.1 | CFQR - Parent/Caregiver       | 25  | cfqr_parent_carer_q25      | My child has less fun than usual                                                                                       |  | option   | 1 = Very true<br>2 = Somewhat true<br>3 = Somewhat false<br>4 = Very false                                                                                                                                                   |
| 14.1 | CFQR - Parent/Caregiver       | 26  | cfqr_parent_carer_q26      | My child has trouble getting along with others                                                                         |  | option   | 1 = Very true<br>2 = Somewhat true<br>3 = Somewhat false<br>4 = Very false                                                                                                                                                   |
| 14.1 | CFQR - Parent/Caregiver       | 27  | cfqr_parent_carer_q27      | My child has trouble concentrating                                                                                     |  | option   | 1 = Very true<br>2 = Somewhat true<br>3 = Somewhat false<br>4 = Very false                                                                                                                                                   |
| 14.1 | CFQR - Parent/Caregiver       | 28  | cfqr_parent_carer_q28      | My child is able to keep up with his/her school work or holiday activities                                             |  | option   | 4 = Very true<br>3 = Somewhat true<br>2 = Somewhat false<br>1 = Very false                                                                                                                                                   |
| 14.1 | CFQR - Parent/Caregiver       | 29  | cfqr_parent_carer_q29      | My child is not doing as well as usual in school or holiday activities                                                 |  | option   | 1 = Very true<br>2 = Somewhat true<br>3 = Somewhat false<br>4 = Very false                                                                                                                                                   |
| 14.1 | CFQR - Parent/Caregiver       | 30  | cfqr_parent_carer_q30      | My child spends a lot of time on his/her treatments everyday                                                           |  | option   | 1 = Very true<br>2 = Somewhat true<br>3 = Somewhat false<br>4 = Very false                                                                                                                                                   |
| 14.1 | CFQR - Parent/Caregiver       | 31  | cfqr_parent_carer_q31      | How difficult is it for your child to do his/her treatments (including medications) each day?                          |  | option   | 4 = Not at all<br>3 = A little<br>2 = Moderately<br>1 = Very                                                                                                                                                                 |
| 14.1 | CFQR - Parent/Caregiver       | 32  | cfqr_parent_carer_q32      | How do you think your child's health is now?                                                                           |  | option   | 4 = Excellent<br>3 = Good<br>2 = Fair<br>1 = Poor                                                                                                                                                                            |
| 14.1 | CFQR - Parent/Caregiver       | 33  | cfqr_parent_carer_q33      | My child had trouble gaining weight                                                                                    |  | option   | 1 = A great deal<br>2 = Somewhat<br>3 = A little<br>4 = Not at all                                                                                                                                                           |
| 14.1 | CFQR - Parent/Caregiver       | 34  | cfqr_parent_carer_q34      | My child was congested                                                                                                 |  | option   | 1 = A great deal<br>2 = Somewhat<br>3 = A little<br>4 = Not at all                                                                                                                                                           |
| 14.1 | CFQR - Parent/Caregiver       | 35  | cfqr_parent_carer_q35      | My child coughed during the day                                                                                        |  | option   | 1 = A great deal<br>2 = Somewhat<br>3 = A little<br>4 = Not at all                                                                                                                                                           |
| 14.1 | CFQR - Parent/Caregiver       | 36  | cfqr_parent_carer_q36      | My child had to cough up mucus                                                                                         |  | option   | 1 = A great deal<br>2 = Somewhat<br>3 = A little<br>4 = Not at all                                                                                                                                                           |
| 14.1 | CFQR - Parent/Caregiver       | 37  | cfqr_parent_carer_q37      | My child's mucus has been mostly:                                                                                      |  | option   | 1 = Clear<br>2 = Clear to yellow<br>3 = Yellowish-green<br>4 = Green with traces of blood<br>5 = Don't know                                                                                                                  |
| 14.1 | CFQR - Parent/Caregiver       | 38  | cfqr_parent_carer_q38      | My child wheezed                                                                                                       |  | option   | 1 = Always<br>2 = Often<br>3 = Sometimes<br>4 = Never                                                                                                                                                                        |
| 14.1 | CFQR - Parent/Caregiver       | 39  | cfqr_parent_carer_q39      | My child had trouble breathing                                                                                         |  | option   | 1 = Always<br>2 = Often<br>3 = Sometimes<br>4 = Never                                                                                                                                                                        |
| 14.1 | CFQR - Parent/Caregiver       | 40  | cfqr_parent_carer_q40      | My child woke up during the night because he/she was coughing                                                          |  | option   | 1 = Always<br>2 = Often<br>3 = Sometimes<br>4 = Never                                                                                                                                                                        |
| 14.1 | CFQR - Parent/Caregiver       | 41  | cfqr_parent_carer_q41      | My child had wind                                                                                                      |  | option   | 1 = Always<br>2 = Often<br>3 = Sometimes<br>4 = Never                                                                                                                                                                        |
| 14.1 | CFQR - Parent/Caregiver       | 42  | cfqr_parent_carer_q42      | My child had diarrhea                                                                                                  |  | option   | 1 = Always<br>2 = Often<br>3 = Sometimes<br>4 = Never                                                                                                                                                                        |
| 14.1 | CFQR - Parent/Caregiver       | 43  | cfqr_parent_carer_q43      | My child had abdominal pain                                                                                            |  | option   | 1 = Always<br>2 = Often<br>3 = Sometimes<br>4 = Never                                                                                                                                                                        |
| 14.1 | CFQR - Parent/Caregiver       | 44  | cfqr_parent_carer_q44      | My child has had eating problems                                                                                       |  | option   | 1 = Always<br>2 = Often<br>3 = Sometimes<br>4 = Never                                                                                                                                                                        |
| 14.2 | CFQR - Ages 12 and 13         |     | cfqr_ages_12_13_datetime   | Completion date/time                                                                                                   |  | datetime |                                                                                                                                                                                                                              |
| 14.2 | CFQR - Ages 12 and 13         | 1   | cfqr_ages_12_13_q1         | You were able to walk as fast as others                                                                                |  | option   | 4 = Very True<br>3 = Mostly True<br>2 = Somewhat True<br>1 = Not at all True                                                                                                                                                 |
| 14.2 | CFQR - Ages 12 and 13         | 2   | cfqr_ages_12_13_q2         | You were able to climb stairs as fast as others                                                                        |  | option   | 4 = Very True<br>3 = Mostly True<br>2 = Somewhat True<br>1 = Not at all True                                                                                                                                                 |



|      |                         |    |                          |                                                                                                     |  |          |  |                                                                                                                                                                                                                       |
|------|-------------------------|----|--------------------------|-----------------------------------------------------------------------------------------------------|--|----------|--|-----------------------------------------------------------------------------------------------------------------------------------------------------------------------------------------------------------------------|
| 14.2 | CFQR - Ages 12 and 13   | 3  | cfqr_ages_12_13_q3       | You were able to run, jump, and climb as you wanted                                                 |  | option   |  | 4 = Very True<br>3 = Mostly True<br>2 = Somewhat True<br>1 = Not at all True                                                                                                                                          |
| 14.2 | CFQR - Ages 12 and 13   | 4  | cfqr_ages_12_13_q4       | You were able to run as quickly and for as long as others                                           |  | option   |  | 4 = Very True<br>3 = Mostly True<br>2 = Somewhat True<br>1 = Not at all True                                                                                                                                          |
| 14.2 | CFQR - Ages 12 and 13   | 5  | cfqr_ages_12_13_q5       | You were able to participate in sports that you enjoy (e.g., swimming, football, dancing or others) |  | option   |  | 4 = Very True<br>3 = Mostly True<br>2 = Somewhat True<br>1 = Not at all True                                                                                                                                          |
| 14.2 | CFQR - Ages 12 and 13   | 6  | cfqr_ages_12_13_q6       | You had difficulty carrying or lifting heavy things such as books, your school bag, or a backpack   |  | option   |  | 1 = Very True<br>2 = Mostly True<br>3 = Somewhat True<br>4 = Not at all True                                                                                                                                          |
| 14.2 | CFQR - Ages 12 and 13   | 7  | cfqr_ages_12_13_q7       | You felt tired                                                                                      |  | option   |  | 1 = Always<br>2 = Often<br>3 = Sometimes<br>4 = Never                                                                                                                                                                 |
| 14.2 | CFQR - Ages 12 and 13   | 8  | cfqr_ages_12_13_q8       | You felt mad                                                                                        |  | option   |  | 1 = Always<br>2 = Often<br>3 = Sometimes<br>4 = Never                                                                                                                                                                 |
| 14.2 | CFQR - Ages 12 and 13   | 9  | cfqr_ages_12_13_q9       | You felt grouchy                                                                                    |  | option   |  | 1 = Always<br>2 = Often<br>3 = Sometimes<br>4 = Never                                                                                                                                                                 |
| 14.2 | CFQR - Ages 12 and 13   | 10 | cfqr_ages_12_13_q10      | You felt worried                                                                                    |  | option   |  | 1 = Always<br>2 = Often<br>3 = Sometimes<br>4 = Never                                                                                                                                                                 |
| 14.2 | CFQR - Ages 12 and 13   | 11 | cfqr_ages_12_13_q11      | You felt sad                                                                                        |  | option   |  | 1 = Always<br>2 = Often<br>3 = Sometimes<br>4 = Never                                                                                                                                                                 |
| 14.2 | CFQR - Ages 12 and 13   | 12 | cfqr_ages_12_13_q12      | You had trouble falling asleep                                                                      |  | option   |  | 1 = Always<br>2 = Often<br>3 = Sometimes<br>4 = Never                                                                                                                                                                 |
| 14.2 | CFQR - Ages 12 and 13   | 13 | cfqr_ages_12_13_q13      | You had bad dreams or nightmares                                                                    |  | option   |  | 1 = Always<br>2 = Often<br>3 = Sometimes<br>4 = Never                                                                                                                                                                 |
| 14.2 | CFQR - Ages 12 and 13   | 14 | cfqr_ages_12_13_q14      | You felt good about yourself                                                                        |  | option   |  | 4 = Always<br>3 = Often<br>2 = Sometimes<br>1 = Never                                                                                                                                                                 |
| 14.2 | CFQR - Ages 12 and 13   | 15 | cfqr_ages_12_13_q15      | You had trouble eating                                                                              |  | option   |  | 1 = Always<br>2 = Often<br>3 = Sometimes<br>4 = Never                                                                                                                                                                 |
| 14.2 | CFQR - Ages 12 and 13   | 16 | cfqr_ages_12_13_q16      | You had to stop fun activities to do your treatments                                                |  | option   |  | 1 = Always<br>2 = Often<br>3 = Sometimes<br>4 = Never                                                                                                                                                                 |
| 14.2 | CFQR - Ages 12 and 13   | 17 | cfqr_ages_12_13_q17      | You were forced to eat                                                                              |  | option   |  | 1 = Always<br>2 = Often<br>3 = Sometimes<br>4 = Never                                                                                                                                                                 |
| 14.2 | CFQR - Ages 12 and 13   | 18 | cfqr_ages_12_13_q18      | You were able to do all of your treatments                                                          |  | option   |  | 4 = Very True<br>3 = Mostly True<br>2 = Somewhat True<br>1 = Not at all True                                                                                                                                          |
| 14.2 | CFQR - Ages 12 and 13   | 19 | cfqr_ages_12_13_q19      | You enjoyed eating                                                                                  |  | option   |  | 4 = Very True<br>3 = Mostly True<br>2 = Somewhat True<br>1 = Not at all True                                                                                                                                          |
| 14.2 | CFQR - Ages 12 and 13   | 20 | cfqr_ages_12_13_q20      | You got together with friends a lot                                                                 |  | option   |  | 4 = Very True<br>3 = Mostly True<br>2 = Somewhat True<br>1 = Not at all True                                                                                                                                          |
| 14.2 | CFQR - Ages 12 and 13   | 21 | cfqr_ages_12_13_q21      | You stayed at home more often than you wanted to                                                    |  | option   |  | 1 = Very True<br>2 = Mostly True<br>3 = Somewhat True<br>4 = Not at all True                                                                                                                                          |
| 14.2 | CFQR - Ages 12 and 13   | 22 | cfqr_ages_12_13_q22      | You felt comfortable sleeping away from home (at a friend of family member's house or elsewhere)    |  | option   |  | 4 = Very True<br>3 = Mostly True<br>2 = Somewhat True<br>1 = Not at all True                                                                                                                                          |
| 14.2 | CFQR - Ages 12 and 13   | 23 | cfqr_ages_12_13_q23      | You felt left out                                                                                   |  | option   |  | 1 = Very True<br>2 = Mostly True<br>3 = Somewhat True<br>4 = Not at all True                                                                                                                                          |
| 14.2 | CFQR - Ages 12 and 13   | 24 | cfqr_ages_12_13_q24      | You often invited friends to your house                                                             |  | option   |  | 4 = Very True<br>3 = Mostly True<br>2 = Somewhat True<br>1 = Not at all True                                                                                                                                          |
| 14.2 | CFQR - Ages 12 and 13   | 25 | cfqr_ages_12_13_q25      | You were teased by other children                                                                   |  | option   |  | 1 = Very True<br>2 = Mostly True<br>3 = Somewhat True<br>4 = Not at all True                                                                                                                                          |
| 14.2 | CFQR - Ages 12 and 13   | 26 | cfqr_ages_12_13_q26      | You felt comfortable discussing your illness with others (friends, teachers)                        |  | option   |  | 4 = Very True<br>3 = Mostly True<br>2 = Somewhat True<br>1 = Not at all True                                                                                                                                          |
| 14.2 | CFQR - Ages 12 and 13   | 27 | cfqr_ages_12_13_q27      | You thought you were too short                                                                      |  | option   |  | 1 = Very True<br>2 = Mostly True<br>3 = Somewhat True<br>4 = Not at all True                                                                                                                                          |
| 14.2 | CFQR - Ages 12 and 13   | 28 | cfqr_ages_12_13_q28      | You thought you were too thin                                                                       |  | option   |  | 1 = Very True<br>2 = Mostly True<br>3 = Somewhat True<br>4 = Not at all True                                                                                                                                          |
| 14.2 | CFQR - Ages 12 and 13   | 29 | cfqr_ages_12_13_q29      | You thought you were physically different from others your age                                      |  | option   |  | 1 = Very True<br>2 = Mostly True<br>3 = Somewhat True<br>4 = Not at all True                                                                                                                                          |
| 14.2 | CFQR - Ages 12 and 13   | 30 | cfqr_ages_12_13_q30      | Doing your treatments bothered you                                                                  |  | option   |  | 1 = Very True<br>2 = Mostly True<br>3 = Somewhat True<br>4 = Not at all True                                                                                                                                          |
| 14.2 | CFQR - Ages 12 and 13   | 31 | cfqr_ages_12_13_q31      | You coughed during the day                                                                          |  | option   |  | 1 = Always<br>2 = Often<br>3 = Sometimes<br>4 = Never                                                                                                                                                                 |
| 14.2 | CFQR - Ages 12 and 13   | 32 | cfqr_ages_12_13_q32      | You woke up during the night because you were coughing                                              |  | option   |  | 1 = Always<br>2 = Often<br>3 = Sometimes<br>4 = Never                                                                                                                                                                 |
| 14.2 | CFQR - Ages 12 and 13   | 33 | cfqr_ages_12_13_q33      | You had to cough up mucus                                                                           |  | option   |  | 1 = Always<br>2 = Often<br>3 = Sometimes<br>4 = Never                                                                                                                                                                 |
| 14.2 | CFQR - Ages 12 and 13   | 34 | cfqr_ages_12_13_q34      | You had trouble breathing                                                                           |  | option   |  | 1 = Always<br>2 = Often<br>3 = Sometimes<br>4 = Never                                                                                                                                                                 |
| 14.2 | CFQR - Ages 12 and 13   | 35 | cfqr_ages_12_13_q35      | Your stomach hurt                                                                                   |  | option   |  | 1 = Always<br>2 = Often<br>3 = Sometimes<br>4 = Never                                                                                                                                                                 |
| 14.3 | CFQR - Adolescent/Adult |    | cfqr_adol_adult_datetime | CFQR completion date/time                                                                           |  | datetime |  |                                                                                                                                                                                                                       |
| 14.3 | CFQR - Adolescent/Adult | 1  | cfqr_adol_adult_q1       | Performing vigorous activities such as running or playing sports                                    |  | option   |  | 1 = A lot of difficulty<br>2 = Some difficulty<br>3 = A little difficulty<br>4 = No difficulty                                                                                                                        |
| 14.3 | CFQR - Adolescent/Adult | 2  | cfqr_adol_adult_q2       | Walking as fast as others                                                                           |  | option   |  | 1 = A lot of difficulty<br>2 = Some difficulty<br>3 = A little difficulty<br>4 = No difficulty                                                                                                                        |
| 14.3 | CFQR - Adolescent/Adult | 3  | cfqr_adol_adult_q3       | Carrying or lifting heavy things such as books, shopping, or school bags                            |  | option   |  | 1 = A lot of difficulty<br>2 = Some difficulty<br>3 = A little difficulty<br>4 = No difficulty                                                                                                                        |
| 14.3 | CFQR - Adolescent/Adult | 4  | cfqr_adol_adult_q4       | Climbing one flight of stairs                                                                       |  | option   |  | 1 = A lot of difficulty<br>2 = Some difficulty<br>3 = A little difficulty<br>4 = No difficulty                                                                                                                        |
| 14.3 | CFQR - Adolescent/Adult | 5  | cfqr_adol_adult_q5       | Climbing stairs as fast as others                                                                   |  | option   |  | 1 = A lot of difficulty<br>2 = Some difficulty<br>3 = A little difficulty<br>4 = No difficulty                                                                                                                        |
| 14.3 | CFQR - Adolescent/Adult | 6  | cfqr_adol_adult_q6       | You felt well                                                                                       |  | option   |  | 4 = Always<br>3 = Often<br>2 = Sometimes<br>1 = Never                                                                                                                                                                 |
| 14.3 | CFQR - Adolescent/Adult | 7  | cfqr_adol_adult_q7       | You felt worried                                                                                    |  | option   |  | 1 = Always<br>2 = Often<br>3 = Sometimes<br>4 = Never                                                                                                                                                                 |
| 14.3 | CFQR - Adolescent/Adult | 8  | cfqr_adol_adult_q8       | You felt useless                                                                                    |  | option   |  | 1 = Always<br>2 = Often<br>3 = Sometimes<br>4 = Never                                                                                                                                                                 |
| 14.3 | CFQR - Adolescent/Adult | 9  | cfqr_adol_adult_q9       | You felt tired                                                                                      |  | option   |  | 1 = Always<br>2 = Often<br>3 = Sometimes<br>4 = Never                                                                                                                                                                 |
| 14.3 | CFQR - Adolescent/Adult | 10 | cfqr_adol_adult_q10      | You felt full of energy                                                                             |  | option   |  | 4 = Always<br>3 = Often<br>2 = Sometimes<br>1 = Never                                                                                                                                                                 |
| 14.3 | CFQR - Adolescent/Adult | 11 | cfqr_adol_adult_q11      | You felt exhausted                                                                                  |  | option   |  | 1 = Always<br>2 = Often<br>3 = Sometimes<br>4 = Never                                                                                                                                                                 |
| 14.3 | CFQR - Adolescent/Adult | 12 | cfqr_adol_adult_q12      | You felt sad                                                                                        |  | option   |  | 1 = Always<br>2 = Often<br>3 = Sometimes<br>4 = Never                                                                                                                                                                 |
| 14.3 | CFQR - Adolescent/Adult | 13 | cfqr_adol_adult_q13      | To what extent do you have difficulty walking?                                                      |  | option   |  | 4 = You can walk a long time without getting tired<br>3 = You can walk a long time but you get tired<br>2 = You cannot walk a long time because you get tired<br>1 = You avoid walking whenever possible because it's |
| 14.3 | CFQR - Adolescent/Adult | 14 | cfqr_adol_adult_q14      | How do you feel about eating?                                                                       |  | option   |  | 1 = Just thinking about food makes you feel sick<br>2 = You never enjoy eating<br>3 = You are sometimes able to enjoy eating<br>4 = You are always able to enjoy eating                                               |
| 14.3 | CFQR - Adolescent/Adult | 15 | cfqr_adol_adult_q15      | To what extent do your treatments make your daily life more difficult?                              |  | option   |  | 4 = Not at all<br>3 = A little<br>2 = Moderately<br>1 = A lot                                                                                                                                                         |
| 14.3 | CFQR - Adolescent/Adult | 16 | cfqr_adol_adult_q16      | How much time do you currently spend each day on your treatments?                                   |  | option   |  | 1 = A lot<br>2 = Some<br>3 = A little<br>4 = Not very much                                                                                                                                                            |

|      |                           |       |                      |                                                                                                                                                      |  |             |       |                                                                                                                                                                                                                          |
|------|---------------------------|-------|----------------------|------------------------------------------------------------------------------------------------------------------------------------------------------|--|-------------|-------|--------------------------------------------------------------------------------------------------------------------------------------------------------------------------------------------------------------------------|
| 14.3 | CFQR - Adolescent/Adult   | 17    | cfqr_adol_adult_q17  | How difficult is it for you to do your treatments (including medications) each day?                                                                  |  | option      |       | 4 = Not at all<br>3 = A little<br>2 = Moderately<br>1 = Very                                                                                                                                                             |
| 14.3 | CFQR - Adolescent/Adult   | 18    | cfqr_adol_adult_q18  | How do you think your health is now?                                                                                                                 |  | option      |       | 4 = Excellent<br>3 = Good<br>2 = Fair<br>1 = Poor                                                                                                                                                                        |
| 14.3 | CFQR - Adolescent/Adult   | 19    | cfqr_adol_adult_q19  | I have trouble recovering after physical effort                                                                                                      |  | option      |       | 1 = Very true<br>2 = Somewhat true<br>3 = Somewhat false<br>4 = Very false                                                                                                                                               |
| 14.3 | CFQR - Adolescent/Adult   | 20    | cfqr_adol_adult_q20  | I have to limit vigorous activities such as running or playing sports                                                                                |  | option      |       | 1 = Very true<br>2 = Somewhat true<br>3 = Somewhat false<br>4 = Very false                                                                                                                                               |
| 14.3 | CFQR - Adolescent/Adult   | 21    | cfqr_adol_adult_q21  | I have to force myself to eat                                                                                                                        |  | option      |       | 1 = Very true<br>2 = Somewhat true<br>3 = Somewhat false<br>4 = Very false                                                                                                                                               |
| 14.3 | CFQR - Adolescent/Adult   | 22    | cfqr_adol_adult_q22  | I have to stay at home more than I want to                                                                                                           |  | option      |       | 1 = Very true<br>2 = Somewhat true<br>3 = Somewhat false<br>4 = Very false                                                                                                                                               |
| 14.3 | CFQR - Adolescent/Adult   | 23    | cfqr_adol_adult_q23  | I feel comfortable discussing my illness with others                                                                                                 |  | option      |       | 4 = Very true<br>3 = Somewhat true<br>2 = Somewhat false<br>1 = Very false                                                                                                                                               |
| 14.3 | CFQR - Adolescent/Adult   | 24    | cfqr_adol_adult_q24  | I think I am too thin                                                                                                                                |  | option      |       | 1 = Very true<br>2 = Somewhat true<br>3 = Somewhat false<br>4 = Very false                                                                                                                                               |
| 14.3 | CFQR - Adolescent/Adult   | 25    | cfqr_adol_adult_q25  | I think I look different from others my age                                                                                                          |  | option      |       | 1 = Very true<br>2 = Somewhat true<br>3 = Somewhat false<br>4 = Very false                                                                                                                                               |
| 14.3 | CFQR - Adolescent/Adult   | 26    | cfqr_adol_adult_q26  | I feel bad about my physical appearance                                                                                                              |  | option      |       | 1 = Very true<br>2 = Somewhat true<br>3 = Somewhat false<br>4 = Very false                                                                                                                                               |
| 14.3 | CFQR - Adolescent/Adult   | 27    | cfqr_adol_adult_q27  | People are afraid that I may be contagious                                                                                                           |  | option      |       | 1 = Very true<br>2 = Somewhat true<br>3 = Somewhat false<br>4 = Very false                                                                                                                                               |
| 14.3 | CFQR - Adolescent/Adult   | 28    | cfqr_adol_adult_q28  | I get together with my friends a lot                                                                                                                 |  | option      |       | 4 = Very true<br>3 = Somewhat true<br>2 = Somewhat false<br>1 = Very false                                                                                                                                               |
| 14.3 | CFQR - Adolescent/Adult   | 29    | cfqr_adol_adult_q29  | I think my coughing bothers others                                                                                                                   |  | option      |       | 1 = Very true<br>2 = Somewhat true<br>3 = Somewhat false<br>4 = Very false                                                                                                                                               |
| 14.3 | CFQR - Adolescent/Adult   | 30    | cfqr_adol_adult_q30  | I feel comfortable going out at night                                                                                                                |  | option      |       | 4 = Very true<br>3 = Somewhat true<br>2 = Somewhat false<br>1 = Very false                                                                                                                                               |
| 14.3 | CFQR - Adolescent/Adult   | 31    | cfqr_adol_adult_q31  | I often feel lonely                                                                                                                                  |  | option      |       | 1 = Very true<br>2 = Somewhat true<br>3 = Somewhat false<br>4 = Very false                                                                                                                                               |
| 14.3 | CFQR - Adolescent/Adult   | 32    | cfqr_adol_adult_q32  | I feel healthy                                                                                                                                       |  | option      |       | 4 = Very true<br>3 = Somewhat true<br>2 = Somewhat false<br>1 = Very false                                                                                                                                               |
| 14.3 | CFQR - Adolescent/Adult   | 33    | cfqr_adol_adult_q33  | It is difficult to make plans for the future (for example, going to college, getting married, getting promoted at work, etc.)                        |  | option      |       | 1 = Very true<br>2 = Somewhat true<br>3 = Somewhat false<br>4 = Very false                                                                                                                                               |
| 14.3 | CFQR - Adolescent/Adult   | 34    | cfqr_adol_adult_q34  | I lead a normal life                                                                                                                                 |  | option      |       | 4 = Very true<br>3 = Somewhat true<br>2 = Somewhat false<br>1 = Very false                                                                                                                                               |
| 14.3 | CFQR - Adolescent/Adult   | 35    | cfqr_adol_adult_q35  | To what extent did you have trouble keeping up with your schoolwork, professional work, or other daily activities during the past two weeks?         |  | option      |       | 4 = You have had no trouble keeping up<br>3 = You have managed to keep up but it's been difficult<br>2 = You have been behind<br>1 = You have not been able to do these activities at all                                |
| 14.3 | CFQR - Adolescent/Adult   | 36    | cfqr_adol_adult_q36  | How often were you absent from school, work, or unable to complete daily activities during the last two weeks because of your illness or treatments? |  | option      |       | 1 = Always<br>2 = Often<br>3 = Sometimes<br>4 = Never                                                                                                                                                                    |
| 14.3 | CFQR - Adolescent/Adult   | 37    | cfqr_adol_adult_q37  | How often does CF get in the way of meeting your school, work, or personal goals?                                                                    |  | option      |       | 1 = Always<br>2 = Often<br>3 = Sometimes<br>4 = Never                                                                                                                                                                    |
| 14.3 | CFQR - Adolescent/Adult   | 38    | cfqr_adol_adult_q38  | How often does CF interfere with getting out of the house to run errands such as shopping or going to the bank?                                      |  | option      |       | 1 = Always<br>2 = Often<br>3 = Sometimes<br>4 = Never                                                                                                                                                                    |
| 14.3 | CFQR - Adolescent/Adult   | 39    | cfqr_adol_adult_q39  | Have you had trouble gaining weight?                                                                                                                 |  | option      |       | 1 = A great deal<br>2 = Somewhat<br>3 = A little<br>4 = Not at all                                                                                                                                                       |
| 14.3 | CFQR - Adolescent/Adult   | 40    | cfqr_adol_adult_q40  | Have you been congested?                                                                                                                             |  | option      |       | 1 = A great deal<br>2 = Somewhat<br>3 = A little<br>4 = Not at all                                                                                                                                                       |
| 14.3 | CFQR - Adolescent/Adult   | 41    | cfqr_adol_adult_q41  | Have you been coughing during the day?                                                                                                               |  | option      |       | 1 = A great deal<br>2 = Somewhat<br>3 = A little<br>4 = Not at all                                                                                                                                                       |
| 14.3 | CFQR - Adolescent/Adult   | 42    | cfqr_adol_adult_q42  | Have you had to cough up mucus?                                                                                                                      |  | option      |       | 1 = A great deal<br>2 = Somewhat<br>3 = A little<br>4 = Not at all                                                                                                                                                       |
| 14.3 | CFQR - Adolescent/Adult   | 43    | cfqr_adol_adult_q43  | Has your mucus been mostly:                                                                                                                          |  | option      |       | 1 = Clear<br>2 = Clear to yellow<br>3 = Yellowish-green<br>4 = Green with traces of blood<br>5 = Don't know                                                                                                              |
| 14.3 | CFQR - Adolescent/Adult   | 44    | cfqr_adol_adult_q44  | Have you been wheezing?                                                                                                                              |  | option      |       | 1 = Always<br>2 = Often<br>3 = Sometimes<br>4 = Never                                                                                                                                                                    |
| 14.3 | CFQR - Adolescent/Adult   | 45    | cfqr_adol_adult_q45  | Have you had trouble breathing?                                                                                                                      |  | option      |       | 1 = Always<br>2 = Often<br>3 = Sometimes<br>4 = Never                                                                                                                                                                    |
| 14.3 | CFQR - Adolescent/Adult   | 46    | cfqr_adol_adult_q46  | Have you woken up during the night because you were coughing?                                                                                        |  | option      |       | 1 = Always<br>2 = Often<br>3 = Sometimes<br>4 = Never                                                                                                                                                                    |
| 14.3 | CFQR - Adolescent/Adult   | 47    | cfqr_adol_adult_q47  | Have you had problems with wind?                                                                                                                     |  | option      |       | 1 = Always<br>2 = Often<br>3 = Sometimes<br>4 = Never                                                                                                                                                                    |
| 14.3 | CFQR - Adolescent/Adult   | 48    | cfqr_adol_adult_q48  | Have you had diarrhea?                                                                                                                               |  | option      |       | 1 = Always<br>2 = Often<br>3 = Sometimes<br>4 = Never                                                                                                                                                                    |
| 14.3 | CFQR - Adolescent/Adult   | 49    | cfqr_adol_adult_q49  | Have you had abdominal pain?                                                                                                                         |  | option      |       | 1 = Always<br>2 = Often<br>3 = Sometimes<br>4 = Never                                                                                                                                                                    |
| 14.3 | CFQR - Adolescent/Adult   | 50    | cfqr_adol_adult_q50  | Have you had eating problems?                                                                                                                        |  | option      |       | 1 = Always<br>2 = Often<br>3 = Sometimes<br>4 = Never                                                                                                                                                                    |
| 14.4 | CRSS                      |       | criss_datetime       | Completion date/time                                                                                                                                 |  | datetime    |       |                                                                                                                                                                                                                          |
| 14.4 | CRSS                      | 1     | criss_q1             | How difficult was it to breathe?                                                                                                                     |  | option      |       | 0 = Not difficult<br>1 = A little difficult<br>2 = Somewhat difficult<br>3 = A good deal difficult<br>4 = A great deal difficult                                                                                         |
| 14.4 | CRSS                      | 2     | criss_q2             | How feverish did you feel (have a temperature)?                                                                                                      |  | option      |       | 0 = Not feverish<br>1 = A little feverish<br>2 = Somewhat feverish<br>3 = A good deal feverish<br>4 = A great deal feverish                                                                                              |
| 14.4 | CRSS                      | 3     | criss_q3             | How tired did you feel?                                                                                                                              |  | option      |       | 0 = Not tired<br>1 = A little tired<br>2 = Somewhat tired<br>3 = A good deal tired<br>4 = A great deal tired                                                                                                             |
| 14.4 | CRSS                      | 4     | criss_q4             | How bad were your chills or sweats                                                                                                                   |  | option      |       | 0 = No chills or sweat<br>1 = Slightly Bad<br>2 = Moderately Bad<br>3 = Very Bad<br>4 = Extremely Bad                                                                                                                    |
| 14.4 | CRSS                      | 5     | criss_q5             | How bad was your cough?                                                                                                                              |  | option      |       | 0 = No cough<br>1 = Slightly Bad<br>2 = Moderately Bad<br>3 = Very Bad<br>4 = Extremely Bad                                                                                                                              |
| 14.4 | CRSS                      | 6     | criss_q6             | How much mucus did you cough up?                                                                                                                     |  | option      |       | 0 = No mucus<br>1 = A little mucus<br>2 = Some mucus<br>3 = A good deal of mucus<br>4 = A great deal of mucus                                                                                                            |
| 14.4 | CRSS                      | 7     | criss_q7             | How much tightness in the chest did you have?                                                                                                        |  | option      |       | 0 = No tightness<br>1 = A little tightness<br>2 = Some tightness<br>3 = A good deal of tightness<br>4 = A great deal of tightness                                                                                        |
| 14.4 | CRSS                      | 8     | criss_q8             | How bad was your wheezing?                                                                                                                           |  | option      |       | 0 = No wheezing<br>1 = Slightly Bad<br>2 = Moderately Bad<br>3 = Very Bad<br>4 = Extremely Bad                                                                                                                           |
| 15   | Total IgE                 | 1.1   | total_ige_date       | Date of sample                                                                                                                                       |  | date        |       |                                                                                                                                                                                                                          |
| 15   | Total IgE                 | 1.2   | total_ige_result     | Result                                                                                                                                               |  | decimal     | IU/ml |                                                                                                                                                                                                                          |
| 16   | Aspergillus Specific RAST | 1.1   | rast_date            | Date of sample                                                                                                                                       |  | date        |       |                                                                                                                                                                                                                          |
| 16   | Aspergillus Specific RAST | 1.2   | rast_result          | Result                                                                                                                                               |  | decimal     | IU/ml |                                                                                                                                                                                                                          |
| 17   | Adverse Events            |       | intensive_therapy_id | Intensive therapy ID                                                                                                                                 |  | linked_form |       |                                                                                                                                                                                                                          |
| 17   | Adverse Events            | 1.1   | aedes_desc           | Event description (please give diagnosis if possible)                                                                                                |  | string      |       |                                                                                                                                                                                                                          |
| 17   | Adverse Events            | 1.2   | aeserious            | Serious                                                                                                                                              |  | boolean     |       | 1 = Yes<br>0 = No                                                                                                                                                                                                        |
| 17   | Adverse Events            | 1.2.1 | aeserioustrsn        | What is the reason this event is considered serious?                                                                                                 |  | option      |       | 1 = Occurred during the period of Intensive Therapy<br>2 = Occurred during the period of Intensive Therapy<br>3 = Occurred during the period of Intensive Therapy<br>4 = Related to Assigned Interventions (at any time) |
| 17   | Adverse Events            | 1.3   | aeonsetdt            | Onset date                                                                                                                                           |  | date        |       |                                                                                                                                                                                                                          |
| 17   | Adverse Events            | 1.4   | aeint                | Any treatments given for this event?                                                                                                                 |  | boolean     |       | 1 = Yes<br>0 = No                                                                                                                                                                                                        |

|    |                |         |             |                                                                                                          |  |        |  |                                                                                            |
|----|----------------|---------|-------------|----------------------------------------------------------------------------------------------------------|--|--------|--|--------------------------------------------------------------------------------------------|
| 17 | Adverse Events | 1.5     | aesev       | Severity                                                                                                 |  | option |  | 1 = Mild<br>2 = Moderate<br>3 = Severe                                                     |
| 17 | Adverse Events | 1.6.1.1 | aebkabrel   | Relationship to assigned intervention in Backbone Antibiotic                                             |  | option |  | 1 = Related<br>2 = Probably related<br>3 = Possibly related<br>4 = Not related             |
| 17 | Adverse Events | 1.6.1.2 | aebkabadj   | Were there any adjustments to the assigned intervention in Backbone Antibiotic attributed to this event? |  | option |  | 0 = No<br>1 = Dose change<br>2 = Temporarily stopped<br>3 = Discontinued completely        |
| 17 | Adverse Events | 1.6.2.1 | aeadabrel   | Relationship to assigned intervention in Adjunct Antibiotic                                              |  | option |  | 1 = Related<br>2 = Probably related<br>3 = Possibly related<br>4 = Not related             |
| 17 | Adverse Events | 1.6.2.2 | aeadabadj   | Were there any adjustments to the assigned intervention in Adjunct Antibiotic attributed to this event?  |  | option |  | 0 = No<br>1 = Dose change<br>2 = Temporarily stopped<br>3 = Discontinued completely        |
| 17 | Adverse Events | 1.7     | aeoutcome   | Outcome                                                                                                  |  | option |  | 1 = Resolved<br>2 = Resolved with sequelae<br>3 = Not resolved                             |
| 17 | Adverse Events | 1.8     | aeresdt     | Resolution date                                                                                          |  | date   |  |                                                                                            |
| 18 | End Of Study   | 1.1     | eosdat      | Date participation in study completed                                                                    |  | date   |  |                                                                                            |
| 18 | End Of Study   | 1.2     | eosreas     | Reason for end of study                                                                                  |  | option |  | 1 = Withdrawal<br>2 = Lung Transplant<br>3 = Participant deceased<br>4 = Other             |
| 18 | End Of Study   | 1.2.1   | eoswithreas | Reason for withdrawal                                                                                    |  | option |  | 1 = Participant decision<br>2 = Investigator decision<br>3 = Sponsor decision<br>4 = Other |
| 18 | End Of Study   | 1.2.2   | eostransdat | Date of Transplant                                                                                       |  | date   |  |                                                                                            |
| 18 | End Of Study   | 1.2.3.1 | eosothdat   | Date of Death                                                                                            |  | date   |  |                                                                                            |
| 18 | End Of Study   | 1.2.3.2 | eosothcaus  | Primary cause of Death                                                                                   |  | string |  |                                                                                            |
| 18 | End Of Study   | 1.2.3.3 | eosothawdat | Date of study staff awareness of death                                                                   |  | date   |  |                                                                                            |
| 18 | End Of Study   | 1.2.4   | eosspec     | Specify other reason                                                                                     |  | string |  |                                                                                            |

| required | rules |
|----------|-------|
| Yes      |       |

If [genotype] = 995

If [genotype1] is entered, Unless [genotype2] = nil

If [genotype2] = 995

If [genotype2] is entered, Unless [genotype3] = nil





|                                                                                                                   |  |
|-------------------------------------------------------------------------------------------------------------------|--|
| <p>If [antibiotic_susceptibility_tested] = Yes, Unless [antibiotic_type_3] = nil Or [antibiotic_type_2] = nil</p> |  |
| <p>If [antibiotic_type_3] = 999<br/>If [antibiotic_type_3] is entered</p>                                         |  |
| <p>If [antibiotic_susceptibility_tested] = Yes, Unless [antibiotic_type_4] = nil Or [antibiotic_type_3] = nil</p> |  |
| <p>If [antibiotic_type_4] = 999<br/>If [antibiotic_type_4] is entered</p>                                         |  |
| <p>If [antibiotic_susceptibility_tested] = Yes, Unless [antibiotic_type_5] = nil Or [antibiotic_type_4] = nil</p> |  |
| <p>If [antibiotic_type_5] = 999<br/>If [antibiotic_type_5] is entered</p>                                         |  |
| <p>If [antibiotic_susceptibility_tested] = Yes, Unless [antibiotic_type_6] = nil Or [antibiotic_type_5] = nil</p> |  |
| <p>If [antibiotic_type_6] = 999<br/>If [antibiotic_type_6] is entered</p>                                         |  |
| <p>If [antibiotic_susceptibility_tested] = Yes, Unless [antibiotic_type_7] = nil Or [antibiotic_type_6] = nil</p> |  |
| <p>If [antibiotic_type_7] = 999<br/>If [antibiotic_type_7] is entered</p>                                         |  |

|                                                                                                                     |  |
|---------------------------------------------------------------------------------------------------------------------|--|
| <p>If [antibiotic_susceptibility_tested] = Yes, Unless [antibiotic_type_8] = nil Or [antibiotic_type_7] = nil</p>   |  |
| <p>If [antibiotic_type_8] = 999<br/>If [antibiotic_type_8] is entered</p>                                           |  |
| <p>If [antibiotic_susceptibility_tested] = Yes, Unless [antibiotic_type_9] = nil Or [antibiotic_type_8] = nil</p>   |  |
| <p>If [antibiotic_type_9] = 999<br/>If [antibiotic_type_9] is entered</p>                                           |  |
| <p>If [antibiotic_susceptibility_tested] = Yes, Unless [antibiotic_type_10] = nil Or [antibiotic_type_9] = nil</p>  |  |
| <p>If [antibiotic_type_10] = 999<br/>If [antibiotic_type_10] is entered</p>                                         |  |
| <p>If [antibiotic_susceptibility_tested] = Yes, Unless [antibiotic_type_11] = nil Or [antibiotic_type_10] = nil</p> |  |
| <p>If [antibiotic_type_11] = 999<br/>If [antibiotic_type_11] is entered</p>                                         |  |
| <p>If [antibiotic_susceptibility_tested] = Yes, Unless [antibiotic_type_12] = nil Or [antibiotic_type_11] = nil</p> |  |
| <p>If [antibiotic_type_12] = 999<br/>If [antibiotic_type_12] is entered</p>                                         |  |

|                                                                                                              |  |
|--------------------------------------------------------------------------------------------------------------|--|
| If [antibiotic_susceptibility_tested] = Yes, Unless [antibiotic_type_13] = nil Or [antibiotic_type_12] = nil |  |
|                                                                                                              |  |
| If [antibiotic_type_13] = 999                                                                                |  |
| If [antibiotic_type_13] is entered                                                                           |  |
|                                                                                                              |  |
| If [antibiotic_susceptibility_tested] = Yes, Unless [antibiotic_type_14] = nil Or [antibiotic_type_13] = nil |  |
|                                                                                                              |  |
| If [antibiotic_type_14] = 999                                                                                |  |
| If [antibiotic_type_14] is entered                                                                           |  |
|                                                                                                              |  |
| If [antibiotic_susceptibility_tested] = Yes, Unless [antibiotic_type_15] = nil Or [antibiotic_type_14] = nil |  |
|                                                                                                              |  |
| If [antibiotic_type_15] = 999                                                                                |  |
| If [antibiotic_type_15] is entered                                                                           |  |
|                                                                                                              |  |
| If [antibiotic_susceptibility_tested] = Yes, Unless [antibiotic_type_16] = nil Or [antibiotic_type_15] = nil |  |
|                                                                                                              |  |
| If [antibiotic_type_16] = 999                                                                                |  |
| If [antibiotic_type_16] is entered                                                                           |  |
|                                                                                                              |  |
| If [antibiotic_susceptibility_tested] = Yes, Unless [antibiotic_type_17] = nil Or [antibiotic_type_16] = nil |  |
|                                                                                                              |  |
| If [antibiotic_type_17] = 999                                                                                |  |
| If [antibiotic_type_17] is entered                                                                           |  |
|                                                                                                              |  |

|                                                                                                              |                                     |
|--------------------------------------------------------------------------------------------------------------|-------------------------------------|
| If [antibiotic_susceptibility_tested] = Yes, Unless [antibiotic_type_18] = nil Or [antibiotic_type_17] = nil |                                     |
|                                                                                                              |                                     |
| If [antibiotic_type_18] = 999                                                                                |                                     |
| If [antibiotic_type_18] is entered                                                                           |                                     |
|                                                                                                              |                                     |
| If [antibiotic_susceptibility_tested] = Yes, Unless [antibiotic_type_19] = nil Or [antibiotic_type_18] = nil |                                     |
|                                                                                                              |                                     |
| If [antibiotic_type_19] = 999                                                                                |                                     |
| If [antibiotic_type_19] is entered                                                                           |                                     |
|                                                                                                              |                                     |
| If [antibiotic_susceptibility_tested] = Yes, Unless [antibiotic_type_20] = nil Or [antibiotic_type_19] = nil |                                     |
|                                                                                                              |                                     |
| If [antibiotic_type_20] = 999                                                                                |                                     |
| If [antibiotic_type_20] is entered                                                                           |                                     |
| Yes                                                                                                          | already exists for this participant |
|                                                                                                              |                                     |
|                                                                                                              |                                     |
|                                                                                                              |                                     |
| No                                                                                                           |                                     |
| No                                                                                                           |                                     |
| Yes                                                                                                          |                                     |
| If [contrasr] = 1                                                                                            |                                     |



|                             |                                                                                                                                                                                            |
|-----------------------------|--------------------------------------------------------------------------------------------------------------------------------------------------------------------------------------------|
| Yes                         |                                                                                                                                                                                            |
| Yes                         | already entered the same active antibiotic during this intens                                                                                                                              |
| Yes                         | on or after the start date of the intensive therapy admission<br>on or before the end date of the intensive therapy admission<br>must not be in the future                                 |
| Yes                         |                                                                                                                                                                                            |
| Yes                         |                                                                                                                                                                                            |
| Yes                         |                                                                                                                                                                                            |
| Yes                         |                                                                                                                                                                                            |
| Yes                         |                                                                                                                                                                                            |
| If [abxfreq] = 8            |                                                                                                                                                                                            |
| No                          | on or after the start date/time<br>on or before the end date of the intensive therapy admission<br>must not be in the future                                                               |
| If [abxstopdatm] is entered |                                                                                                                                                                                            |
| If [abxstopprsn] = 6        |                                                                                                                                                                                            |
| If [abxstopdatm] is entered | between 0 and 6                                                                                                                                                                            |
| If <embedded code>          | on or after the start date of the intensive therapy admission<br>on or before the end date of the intensive therapy admission                                                              |
| If <embedded code>          | on or after the start date of the intensive therapy admission<br>on or before the end date of the intensive therapy admission                                                              |
| If <embedded code>          | on or after the start date of the intensive therapy admission<br>on or before the end date of the intensive therapy admission                                                              |
| If <embedded code>          | on or after the start date of the intensive therapy admission<br>on or before the end date of the intensive therapy admission                                                              |
| If <embedded code>          | on or after the start date of the intensive therapy admission<br>on or before the end date of the intensive therapy admission                                                              |
| If <embedded code>          | on or after the start date of the intensive therapy admission<br>on or before the end date of the intensive therapy admission                                                              |
| Yes                         |                                                                                                                                                                                            |
| Yes                         |                                                                                                                                                                                            |
| If [ittr] = 99              |                                                                                                                                                                                            |
| Yes                         | on or after the start date of the intensive therapy admission<br>on or before the end date of the intensive therapy admission<br>on or before today's date                                 |
| Yes                         | between 1 and 1000                                                                                                                                                                         |
| Yes                         |                                                                                                                                                                                            |
| Yes                         |                                                                                                                                                                                            |
| No                          | on or after the prescription start date<br>on or before the end date of the intensive therapy admission<br>on or before today's date                                                       |
| Yes                         |                                                                                                                                                                                            |
| Yes                         |                                                                                                                                                                                            |
| If [altr] = 3               |                                                                                                                                                                                            |
| Yes                         | on or after the start date of the intensive therapy admission<br>on or before the end date of the intensive therapy admission<br>on or before today's date                                 |
| Yes                         | between 1 and 1000                                                                                                                                                                         |
| Yes                         |                                                                                                                                                                                            |
| Yes                         |                                                                                                                                                                                            |
| Unless [aistopdat] = nil    | on or after the prescription start date<br>on or before the end date of the intensive therapy admission<br>on or before today's date                                                       |
| Yes                         |                                                                                                                                                                                            |
| Yes                         | on or after the start date of the intensive therapy admission<br>on or before the end date of the intensive therapy admission<br>on or before today's date<br>already exists for this date |
| Yes                         | between 1 and 4                                                                                                                                                                            |
| Yes                         |                                                                                                                                                                                            |
| If [phactacbt] is Yes       | between 1 and 21                                                                                                                                                                           |
| If [phactacbt] is Yes       |                                                                                                                                                                                            |
| If [phactacbt] is Yes       |                                                                                                                                                                                            |
| If [phactacbt] is Yes       |                                                                                                                                                                                            |
| Yes                         |                                                                                                                                                                                            |
| If [phactaad] is Yes        | between 1 and 21                                                                                                                                                                           |
| If [phactaad] is Yes        |                                                                                                                                                                                            |

|                                        |                                                                                                                      |
|----------------------------------------|----------------------------------------------------------------------------------------------------------------------|
| If [phactaad] is Yes                   |                                                                                                                      |
| If [phactaad] is Yes                   |                                                                                                                      |
| Yes                                    |                                                                                                                      |
| If [phactpep] is Yes                   | between 1 and 21                                                                                                     |
| If [phactpep] is Yes                   |                                                                                                                      |
|                                        |                                                                                                                      |
| If [phactpep] is Yes                   |                                                                                                                      |
| If [phactpep] is Yes                   |                                                                                                                      |
| Yes                                    |                                                                                                                      |
| If [phactopep] is Yes                  | between 1 and 21                                                                                                     |
| If [phactopep] is Yes                  |                                                                                                                      |
|                                        |                                                                                                                      |
| If [phactopep] is Yes                  |                                                                                                                      |
| If [phactopep] is Yes                  |                                                                                                                      |
| Yes                                    |                                                                                                                      |
| If [phactbpep] is Yes                  | between 1 and 21                                                                                                     |
| If [phactbpep] is Yes                  |                                                                                                                      |
|                                        |                                                                                                                      |
| If [phactbpep] is Yes                  |                                                                                                                      |
| If [phactbpep] is Yes                  |                                                                                                                      |
| Yes                                    |                                                                                                                      |
| If [phactnrv] is Yes                   | between 1 and 21                                                                                                     |
| If [phactnrv] is Yes                   |                                                                                                                      |
|                                        |                                                                                                                      |
| If [phactnrv] is Yes                   |                                                                                                                      |
| If [phactnrv] is Yes                   |                                                                                                                      |
| Yes                                    |                                                                                                                      |
| If [phactman] is Yes                   | between 1 and 21                                                                                                     |
| If [phactman] is Yes                   |                                                                                                                      |
|                                        |                                                                                                                      |
| If [phactman] is Yes                   |                                                                                                                      |
| If [phactman] is Yes                   |                                                                                                                      |
| Yes                                    |                                                                                                                      |
| If [phactvest] is Yes                  | between 1 and 21                                                                                                     |
| If [phactvest] is Yes                  |                                                                                                                      |
|                                        |                                                                                                                      |
| If [phactvest] is Yes                  |                                                                                                                      |
| If [phactvest] is Yes                  |                                                                                                                      |
| Yes                                    |                                                                                                                      |
| If [phactexec] is Yes                  | between 1 and 21                                                                                                     |
| If [phactexec] is Yes                  |                                                                                                                      |
|                                        |                                                                                                                      |
| If [phactexec] is Yes                  |                                                                                                                      |
| If [phactexec] is Yes                  |                                                                                                                      |
| Yes                                    |                                                                                                                      |
| If [phactmetaneb] is Yes               | between 1 and 21                                                                                                     |
| If [phactmetaneb] is Yes               |                                                                                                                      |
|                                        |                                                                                                                      |
| If [phactmetaneb] is Yes               |                                                                                                                      |
| If [phactmetaneb] is Yes               |                                                                                                                      |
| Yes                                    |                                                                                                                      |
| If [phacttoth] is Yes                  |                                                                                                                      |
| If [phacttoth] is Yes                  |                                                                                                                      |
| If [phacttoth] is Yes                  |                                                                                                                      |
|                                        |                                                                                                                      |
| If [phacttoth] is Yes                  |                                                                                                                      |
| If [phacttoth] is Yes                  |                                                                                                                      |
| Yes                                    |                                                                                                                      |
| If [phexeaero] is Yes                  | between 1 and 21                                                                                                     |
| If [phexeaero] is Yes                  |                                                                                                                      |
|                                        |                                                                                                                      |
| Yes                                    |                                                                                                                      |
| If [phexeresist] is Yes                | between 1 and 21                                                                                                     |
| If [phexeresist] is Yes                |                                                                                                                      |
|                                        |                                                                                                                      |
| Yes                                    |                                                                                                                      |
| If [phexehit] is Yes                   | between 1 and 21                                                                                                     |
| If [phexehit] is Yes                   |                                                                                                                      |
|                                        |                                                                                                                      |
| Yes                                    |                                                                                                                      |
| If [phexeplay] is Yes                  | between 1 and 21                                                                                                     |
| If [phexeplay] is Yes                  |                                                                                                                      |
|                                        |                                                                                                                      |
| Yes                                    |                                                                                                                      |
| If [phexeoeth] is Yes                  |                                                                                                                      |
| If [phexeoeth] is Yes                  | between 1 and 21                                                                                                     |
| If [phexeoeth] is Yes                  |                                                                                                                      |
|                                        |                                                                                                                      |
| Yes                                    |                                                                                                                      |
| Yes                                    | after the start date of the intensive therapy admission<br>on or before today's date<br>already exists for this date |
| Unless [treatment_stopped_previously?] |                                                                                                                      |
| If [haxintrin] = No                    | the day of or day before Daily date<br>on or before Daily date                                                       |
| Yes                                    |                                                                                                                      |
| If [haxdischyn] = No                   |                                                                                                                      |
| If [haxloc] = 1                        |                                                                                                                      |
| If [haxdischyn] = Yes                  | the day of or day before Daily date<br>no more than 7 days after last dose<br>on or before Daily date                |
| Unless [caxcoughbna] is entered        |                                                                                                                      |
| No                                     |                                                                                                                      |
| If [caxcoughtp] = 1                    |                                                                                                                      |
| Unless [caxcreptina] is entered        |                                                                                                                      |
| No                                     |                                                                                                                      |
| Yes                                    |                                                                                                                      |
| Yes                                    |                                                                                                                      |
| Yes                                    |                                                                                                                      |













|                  |                                                                       |
|------------------|-----------------------------------------------------------------------|
| Yes              |                                                                       |
| Yes              |                                                                       |
| Yes              |                                                                       |
| Yes              |                                                                       |
| Yes              |                                                                       |
| Yes              |                                                                       |
| Yes              |                                                                       |
| If [resolved?]   | on or after onset date<br>cannot be in the future                     |
| Yes              | on or after date of 1st consent<br>on or before today's date          |
| Yes              |                                                                       |
| If [cosreas] = 1 |                                                                       |
| If [cosreas] = 2 | on or after date of 1st consent<br>on or before study completion date |
| If [cosreas] = 3 | on or after date of 1st consent<br>on or before study completion date |
| If [cosreas] = 3 |                                                                       |
| If [cosreas] = 3 | on or after death date<br>on or before the study completion date      |
| If [cosreas] = 4 |                                                                       |
